# Supplementary material for: Silver-mediated direct C–H amination of BODIPYs for screening endoplasmic reticulum-targeting reagents
Source: Royal Society of Chemistry journal article supplement (doi:10.1039/c8cc00238j), 2018-01-01

## *Supporting Information*

### **Silver-mediated direct C–H amination of BODIPYs for screening endoplasmic reticulum-targeting reagents**

*Huaxing Zhang, Xingyu Chen, Jingbo Lan,\* Yanhong Liu, Fulin Zhou, Di Wu,\**

*Jingsong You\**

Key Laboratory of Green Chemistry and Technology of Ministry of Education,  
College of Chemistry, Sichuan University, 29 Wangjiang Road, Chengdu 610064, PR  
China

Fax: 86-28-85412203; E-mail: *jingbolan@scu.edu.cn; wood@scu.edu.cn;*

*jsyou@scu.edu.cn.*

## Table of contents

|                                                                   |     |
|-------------------------------------------------------------------|-----|
| I. General remarks.....                                           | S1  |
| II. Synthesis and compounds characterization.....                 | S2  |
| III. Single crystal X-ray structures .....                        | S22 |
| IV. Mechanistic study.....                                        | S22 |
| V. Photophysical data of BODIPYs.....                             | S23 |
| VI. Cell imaging experiments and cytotoxicity assays.....         | S29 |
| VII. References.....                                              | S31 |
| VIII. Copies of $^1\text{H}$ and $^{13}\text{C}$ NMR spectra..... | S32 |

## I. General remarks

NMR spectra were obtained on a Bruker AV II-400 MHz or a Varian Inova 400 MHz spectrometer. The  $^1\text{H}$  NMR (400 MHz) chemical shifts were measured relative to  $\text{CDCl}_3$  or  $\text{DMSO-}d_6$  as the internal reference ( $\text{CDCl}_3$ :  $\delta = 7.26$  ppm;  $\text{DMSO-}d_6$ :  $\delta = 2.50$  ppm). The  $^{13}\text{C}$  NMR (100 MHz) chemical shifts were given using  $\text{CDCl}_3$  or  $\text{DMSO-}d_6$  as the internal standard ( $\text{CDCl}_3$ :  $\delta = 77.16$  ppm;  $\text{DMSO-}d_6$ :  $\delta = 39.52$  ppm). High resolution mass spectra (HR-MS) were obtained with a Waters-Q-TOF-Premier ( $\text{ESI}^+$ ). X-Ray single-crystal diffraction data were collected on an Agilent Technologies Gemini single crystal diffractometer. Melting points were determined with XRC-1 and are uncorrected. Absorption spectra were obtained on a HITACHI U-2910 spectrometer. Fluorescence spectra and absolute quantum yields were collected on a Horiba Jobin Yvon-Edison Fluoromax-4 fluorescence spectrometer with a calibrated integrating sphere system. To reduce the fluctuation in the excitation intensity, the lamp was kept on for 1 h prior to the experiment. The confocal living cell imaging was performed on a Leica TCS SP8 confocal fluorescent microscope.

Unless otherwise noted, all reagents were obtained from commercial suppliers and used without further purification.

8-(*p*-Tolyl)-4,4-difluoro-4-bora-3*a*,4*a*-diazas-indacene (8-(*p*-tolyl)-BODIPY)<sup>1</sup> (**1a**), 8-phenyl-4,4-difluoro-4-bora-3*a*,4*a*-diazas-indacene (8-phenyl-BODIPY)<sup>1</sup> (**1b**), 8-(*p*-cyano-phenyl)-4,4-difluoro-4-bora-3*a*,4*a*-diazas-indacene (8-(*p*-cyano-phenyl)-BODIPY)<sup>2</sup> (**1c**), 8-(3,5-*bis*(trifluoromethyl)phenyl)-4,4-difluoro-4-bora-3*a*,4*a*-diazas-indacene (8-(3,5-*bis*(trifluoromethyl)phenyl)-BODIPY)<sup>3</sup> (**1d**), 8-(thiophen-2-yl)-4,4-difluoro-4-bora-3*a*,4*a*-diazas-indacene (8-(thiophen-2-yl)-BODIPY)<sup>4</sup> (**1e**), 2-bromo-8-(*p*-Tolyl)-4,4-difluoro-4-bora-3*a*,4*a*-diazas-indacene (2-bromo-8-(*p*-tolyl)-BODIPY)<sup>1</sup> (**1g**), 4,4-difluoro-4-bora-3*a*,4*a*-diazas-indacene (BODIPY)<sup>5</sup> (**1h**) and 8-(4-nitrophenyl)-4,4-difluoro-4-bora-3*a*,4*a*-diazas-indacene (8-(4-nitrophenyl)-BODIPY)<sup>1</sup> (**1i**) were prepared according to the literatures.

## II. Synthesis and compounds characterization

### (1) Optimization of direct C–H amination

A dried Schlenk tube with a magnetic stir bar was charged with 8-(*p*-tolyl)-BODIPY (**1a**, 0.05 mmol), pyrazole (**2a**, 0.20 mmol, 4.0 equiv) and additives. The system was evacuated thrice and back filled with N<sub>2</sub>. Next, the solvent was added *via* a syringe and the rubber septum was replaced with a polytetrafluoroethylene stopper under N<sub>2</sub>. Then the reaction mixture was stirred at the indicated temperature for 2-24 h in an oil bath. After the reaction mixture was cooled to ambient temperature, the solvent was removed under reduced pressure. The residue was dissolved in 10 mL of CH<sub>2</sub>Cl<sub>2</sub>, filtered through a celite pad, and then washed with 20-30 mL of CH<sub>2</sub>Cl<sub>2</sub>. The combined filtrates were concentrated and purified *via* column chromatography on silica gel (100-200 mesh) to provide the desired products.

**Table S1. Optimization of the direct C–H amination of BODIPY with pyrazole<sup>a</sup>**

| 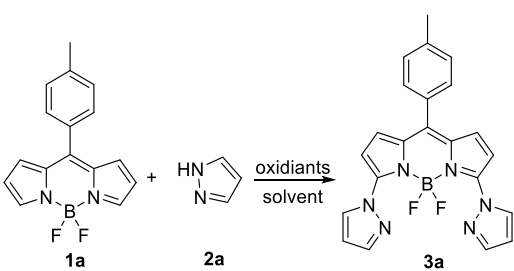 |           |           |                                              |         |                |             |                           |
|--------------------------------------------------------------------------------------|-----------|-----------|----------------------------------------------|---------|----------------|-------------|---------------------------|
| Entry                                                                                | <b>1a</b> | <b>2a</b> | oxidants                                     | Solvent | Temp.<br>( °C) | Time<br>(h) | Yield <sup>b</sup><br>(%) |
| 1                                                                                    | 0.05 mol  | 0.2 mol   | Ag <sub>2</sub> O                            | DMSO    | 120            | 12          | 67                        |
| 2                                                                                    | 0.05 mol  | 0.2 mol   | MnO <sub>2</sub>                             | DMSO    | 120            | 12          | 48                        |
| 3                                                                                    | 0.05 mol  | 0.2 mol   | BQ                                           | DMSO    | 120            | 12          | trace                     |
| 4                                                                                    | 0.05 mol  | 0.2 mol   | AgOAc                                        | DMSO    | 120            | 12          | 80                        |
| 5                                                                                    | 0.05 mol  | 0.2 mol   | Cu(OAc) <sub>2</sub>                         | DMSO    | 120            | 12          | trace                     |
| 6                                                                                    | 0.05 mol  | 0.2 mol   | K <sub>2</sub> S <sub>2</sub> O <sub>8</sub> | DMSO    | 120            | 12          | trace                     |
| 7 <sup>c</sup>                                                                       | 0.05 mol  | 0.2 mol   | O <sub>2</sub>                               | DMSO    | 120            | 12          | none                      |
| 8                                                                                    | 0.05 mol  | 0.2 mol   | PhI(OAc) <sub>2</sub>                        | DMSO    | 120            | 12          | none                      |
| 9 <sup>d</sup>                                                                       | 0.05 mol  | 0.2 mol   | AgOAc/O <sub>2</sub>                         | DMSO    | 120            | 12          | 13                        |
| 10 <sup>e</sup>                                                                      | 0.05 mol  | 0.2 mol   | AgOAc/MnO <sub>2</sub>                       | DMSO    | 120            | 12          | 48                        |

|                 |                 |                |                                                     |                        |           |           |           |
|-----------------|-----------------|----------------|-----------------------------------------------------|------------------------|-----------|-----------|-----------|
| 11 <sup>f</sup> | 0.05 mol        | 0.2 mol        | AgOAc/K <sub>2</sub> CO <sub>3</sub>                | DMSO                   | 120       | 12        | N.D.      |
| 12 <sup>f</sup> | 0.05 mol        | 0.2 mol        | AgOAc/PivOH                                         | DMSO                   | 120       | 12        | 60        |
| 13 <sup>f</sup> | 0.05 mol        | 0.2 mol        | Ag <sub>2</sub> CO <sub>3</sub> /<br>Phenanthroline | DMSO                   | 120       | 12        | 58        |
| 14 <sup>f</sup> | 0.05 mol        | 0.2 mol        | AgOAc/PPh <sub>3</sub>                              | DMSO                   | 120       | 12        | 60        |
| 15              | 0.05 mol        | 0.2 mol        | AgOAc                                               | DCE                    | 120       | 12        | N.D.      |
| 16              | 0.05 mol        | 0.2 mol        | AgOAc                                               | DMF                    | 120       | 12        | 24        |
| 17              | 0.05 mol        | 0.2 mol        | AgOAc                                               | MeCN                   | 120       | 12        | 20        |
| 18              | 0.05 mol        | 0.2 mol        | AgOAc                                               | Toluene                | 120       | 12        | N.D.      |
| 19              | 0.05 mol        | 0.2 mol        | AgOAc                                               | THF                    | 120       | 12        | N.D.      |
| 20              | 0.05 mol        | 0.2 mol        | AgOAc                                               | Dioxane                | 120       | 12        | N.D.      |
| 21              | 0.05 mol        | 0.2 mol        | AgOAc                                               | 2-Methyl-2-<br>butanol | 120       | 12        | N.D.      |
| 22              | 0.05 mol        | 0.2 mol        | AgOAc                                               | DMSO/<br>MeCN(1:1)     | 120       | 12        | 62        |
| 23              | 0.05 mol        | 0.2 mol        | AgOAc                                               | DMSO/<br>MeCN(1:10)    | 120       | 12        | 67        |
| 24              | 0.05 mol        | 0.2 mol        | AgOAc                                               | DMSO/<br>MeCN(10:1)    | 120       | 12        | 67        |
| 25              | 0.05 mol        | 0.05 mol       | AgOAc                                               | DMSO                   | 120       | 12        | 42        |
| 26              | 0.05 mol        | 0.1 mol        | AgOAc                                               | DMSO                   | 120       | 12        | 64        |
| 27              | 0.05 mol        | 0.4 mol        | AgOAc                                               | DMSO                   | 120       | 12        | 81        |
| 28              | 0.05 mol        | 0.2 mol        | AgOAc                                               | DMSO                   | 120       | 2         | 59        |
| 29              | 0.05 mol        | 0.2 mol        | AgOAc                                               | DMSO                   | 120       | 6         | 71        |
| 30              | 0.05 mol        | 0.2 mol        | AgOAc                                               | DMSO                   | 120       | 12        | 81        |
| 31              | 0.05 mol        | 0.2 mol        | AgOAc                                               | DMSO                   | 120       | 24        | 55        |
| 32 <sup>g</sup> | 0.05mol         | 0.2mol         | AgOAc                                               | DMSO                   | 120       | 12        | 75        |
| 33 <sup>h</sup> | 0.05mol         | 0.2mol         | AgOAc                                               | DMSO                   | 120       | 12        | 40        |
| 34 <sup>i</sup> | 0.05mol         | 0.2mol         | AgOAc                                               | DMSO                   | 120       | 12        | 72        |
| 35              | 0.05 mol        | 0.2 mol        | AgOAc                                               | DMSO                   | rt        | 12        | 71        |
| 36              | 0.05 mol        | 0.2 mol        | AgOAc                                               | DMSO                   | 60        | 12        | 69        |
| 37              | <b>0.05 mol</b> | <b>0.2 mol</b> | <b>AgOAc</b>                                        | <b>DMSO</b>            | <b>80</b> | <b>12</b> | <b>88</b> |
| 38              | 0.05 mol        | 0.2 mol        | AgOAc                                               | DMSO                   | 100       | 12        | 72        |
| 39              | 0.05 mol        | 0.2 mol        | AgOAc                                               | DMSO                   | 140       | 12        | 55        |

<sup>a</sup>Reaction conditions: 8-(*p*-Tolyl)-BODIPY (**1a**, 0.05 mmol), pyrazole (**2a**, 4.0 equiv), oxidant (4.0 equiv) and solvent (1.0 mL) at 120 °C for 12 h under N<sub>2</sub> atmosphere. <sup>b</sup>Isolated yields. <sup>c</sup>Under O<sub>2</sub> atmosphere. <sup>d</sup>AgOAc (20 mol%) and under O<sub>2</sub> atmosphere. <sup>e</sup>AgOAc (20 mol%) and MnO<sub>2</sub> (4.0 equiv). <sup>f</sup>AgOAc (4.0 equiv) and additives (2.0 equiv). <sup>g</sup>AgOAc (3.0 equiv). <sup>h</sup>AgOAc (2.0 equiv). <sup>i</sup>AgOAc (3.0 equiv) and in the dark condition. PivOH = pivalic acid, BQ = 1,4-benzoquinone, DMSO = dimethylsulfoxide, DMF = *N,N*-dimethylformamide, DCE = 1,2-dichloroethane, THF = tetrahydrofuran, and N.D. = no detection.

## (2) General procedure for direct C–H amination of BODIPYs

A dried Schlenk tube with a magnetic stir bar was charged with BODIPY (0.05 mmol), amine (0.20 mmol, 4.0 equiv) and AgOAc (4.0 equiv). The system was evacuated thrice and back filled with N<sub>2</sub>. Next, the solvent DMSO was added *via* a syringe and the rubber septum was replaced with a polytetrafluoroethylene stopper under N<sub>2</sub>. Then the reaction mixture was stirred at the 80 °C for 12 h in an oil bath. After the reaction mixture was cooled to ambient temperature, the solvent was removed under reduced pressure. The residue was dissolved in 10 mL of CH<sub>2</sub>Cl<sub>2</sub>, filtered through a celite pad, and then washed with 20-30 mL of CH<sub>2</sub>Cl<sub>2</sub>. The combined filtrates were concentrated and purified *via* column chromatography on silica gel (100-200 mesh) to provide the desired products.

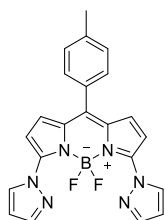

### 3,5-Di(1*H*-pyrazol-1-yl)-8-(*p*-tolyl)-BODIPY (**3a**)

Following the general procedure, the mixture of 8-(*p*-tolyl)-BODIPY (**1a**, 14.1 mg, 0.05 mmol), pyrazole (**2a**, 13.6 mg, 0.20 mmol), AgOAc (33.4 mg, 4.0 equiv), DMSO (1.0 mL) was stirred at 80 °C for 12 h. Purification *via* column chromatography on silica gel (petroleum ether/ethyl acetate/dichloromethane = 20/1/1, v/v) afforded the product **3a** (18.2 mg) in 88% yield as a brown solid with a greenish metallic lustre. M.p.: 200-202 °C. <sup>1</sup>H NMR (400 MHz, CDCl<sub>3</sub>)  $\delta$  = 2.48 (s, 3H), 6.53-6.54 (m, 2H), 6.92 (d, *J* = 4.4 Hz, 2H), 6.97 (d, *J* = 4.4 Hz, 2H), 7.34 (d, *J* = 8.4 Hz, 2H), 7.45 (d, *J* = 8.0 Hz, 2H), 7.80 (d, *J* = 1.6 Hz, 2H), 8.80 (d, *J* = 2.8 Hz, 2H). <sup>13</sup>C NMR (100 MHz, CDCl<sub>3</sub>)  $\delta$  = 21.6, 109.1, 113.4, 129.3, 130.6-130.8 (m), 131.2, 132.1, 132.2, 132.3,

132.4, 141.0, 143.3, 150.7. HRMS (ESI<sup>+</sup>): calcd. for C<sub>22</sub>H<sub>18</sub>BF<sub>2</sub>N<sub>6</sub> [M+H]<sup>+</sup>: 415.1649, found: 415.1649.

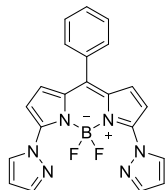

### 3,5-Di(1*H*-pyrazol-1-yl)-8-phenyl-BODIPY (**3b**)

Following the general procedure, the mixture of 8-phenyl-BODIPY (**1b**, 13.4 mg, 0.05 mmol), pyrazole (**2a**, 13.6 mg, 0.20 mmol), AgOAc (33.4 mg, 4.0 equiv), DMSO (1.0 mL) was stirred at 80 °C for 12 h. Purification *via* column chromatography on silica gel (petroleum ether/ethyl acetate/dichloromethane = 20/1/1, v/v) afforded the product **3b** (16.1 mg) in 80% yield as a brown solid with a greenish metallic lustre. M.p.: 202-204 °C. <sup>1</sup>H NMR (400 MHz, CDCl<sub>3</sub>) δ = 6.55 (dd, *J* = 2.8 Hz, 1.6 Hz, 2H), 6.90 (d, *J* = 4.8 Hz, 2H), 6.99 (d, *J* = 3.6 Hz, 2H), 7.53-7.57 (m, 5H), 7.81 (d, *J* = 1.6 Hz, 2H), 8.82 (d, *J* = 2.8, 2H). <sup>13</sup>C NMR (100 MHz, CDCl<sub>3</sub>) δ = 109.2, 113.6, 128.6, 130.5, 130.7, 131.2, 132.1, 132.2, 132.3, 133.6, 143.3, 150.9. HRMS (ESI<sup>+</sup>): calcd. for C<sub>21</sub>H<sub>16</sub>BF<sub>2</sub>N<sub>6</sub> [M+H]<sup>+</sup>: 401.1492, found: 401.1488.

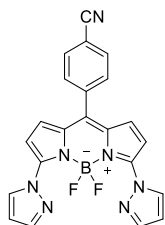

### 3,5-Di(1*H*-pyrazol-1-yl)-8-(*p*-cyano-phenyl)-BODIPY (**3c**)

Following the general procedure, the mixture of 8-(*p*-cyano-phenyl)-BODIPY (**1c**, 14.6 mg, 0.05 mmol), pyrazole (**2a**, 13.6 mg, 0.20 mmol), AgOAc (33.4 mg, 4.0 equiv), DMSO (1.0 mL) was stirred at 80 °C for 12 h. Purification *via* column chromatography on silica gel (petroleum ether/ethyl acetate/dichloromethane = 20/1/1, v/v) afforded the product **3c** (19.1 mg) in 90% yield as a golden solid with a golden metallic lustre. M.p.: 234-236 °C. <sup>1</sup>H NMR (400MHz, CDCl<sub>3</sub>) δ = 6.57 (dd, *J* = 2.8 Hz, 1.6 Hz, 2H), 6.79 (d, *J* = 4.4 Hz, 2H), 7.03 (d, *J* = 4.4 Hz, 2H), 7.67-7.70 (m, 2H), 7.82 (d, *J* = 1.6 Hz, 2H), 7.84-7.86 (m, 2H), 8.82 (d, *J* = 2.8 Hz, 2H). <sup>13</sup>C NMR (100 MHz, CDCl<sub>3</sub>) δ = 109.6, 114.2, 114.4, 118.1, 130.5, 131.3, 132.0, 132.1, 132.2, 132.4,

138.1, 143.7, 151.6. HRMS (ESI<sup>+</sup>): calcd. for C<sub>22</sub>H<sub>15</sub>BF<sub>2</sub>N<sub>7</sub> [M+H]<sup>+</sup>: 426.1445, found: 426.1459.

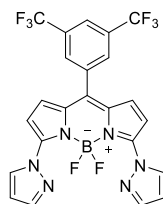

### 3,5-Di(1*H*-pyrazol-1-yl)-8-(3,5-bis(trifluoromethyl)phenyl)-BODIPY (**3d**)

Following the general procedure, the mixture of 8-(3,5-bis(trifluoromethyl)phenyl)-BODIPY (**1d**, 20.2 mg, 0.05 mmol), pyrazole (**2a**, 13.6 mg, 0.20 mmol), AgOAc (33.4 mg, 4.0 equiv), DMSO (1.0 mL) was stirred at 80 °C for 12 h. Purification *via* column chromatography on silica gel (petroleum ether/ethyl acetate/dichloromethane = 10/1/10, v/v) afforded the product **3d** (21.4 mg) in 80% yield as a golden solid with a golden metallic lustre. M.p.: 206-208 °C. <sup>1</sup>H NMR (400MHz, CDCl<sub>3</sub>) δ = 6.58 (dd, *J* = 2.8 Hz, 1.6 Hz, 2H), 6.75 (d, *J* = 4.4 Hz, 2H), 7.07 (d, *J* = 4.0 Hz, 2H), 7.83 (d, *J* = 1.6 Hz, 2H), 8.03 (s, 2H), 8.11 (s, 1H), 8.83 (d, *J* = 2.8 Hz, 2H). <sup>13</sup>C NMR (100 MHz, CDCl<sub>3</sub>) δ = 109.8, 114.6, 123.0 (q, *J*<sub>C-F</sub> = 273.0 Hz), 124.1-124.2 (m), 130.3, 130.45-130.48 (m), 132.0, 132.1, 132.2, 132.3, 132.4 (q, *J*<sub>C-F</sub> = 34.0 Hz), 135.7, 137.9, 143.9, 151.9. HRMS (ESI<sup>+</sup>): calcd. for C<sub>23</sub>H<sub>13</sub>BF<sub>8</sub>N<sub>6</sub>Na [M+Na]<sup>+</sup>: 559.1059, found: 559.1061.

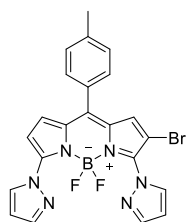

### 2-Bromo-3,5-di(1*H*-pyrazol-1-yl)-8-(*p*-tolyl)-BODIPY (**3e**)

Following the general procedure, the mixture of 2-bromo-8-(*p*-tolyl)-BODIPY (**1g**, 18.0 mg, 0.05 mmol), pyrazole (**2a**, 13.6 mg, 0.20 mmol), AgOAc (33.4 mg, 4.0 equiv), DMSO (1.0 mL) was stirred at 80 °C for 12 h. Purification *via* column chromatography on silica gel (petroleum ether/ethyl acetate/dichloromethane = 5/1/1, v/v) afforded the product **3e** (18.7 mg) in 76% yield as a amaranthine powder. M.p.: 214-216 °C. <sup>1</sup>H NMR (400MHz, CDCl<sub>3</sub>) δ = 2.49 (s, 3H), 6.50 (dd, *J* = 2.8 Hz, 1.6

Hz, 1H), 6.54 (dd,  $J = 2.4$  Hz, 2.0 Hz, 1H), 6.82 (s, 1H), 7.11 (d,  $J = 4.8$  Hz, 1H), 7.21 (d,  $J = 4.8$  Hz, 1H), 7.37 (d,  $J = 8.0$  Hz, 2H), 7.44-7.46 (m, 2H), 7.80 (d,  $J = 1.6$  Hz, 1H), 7.88-7.89 (m, 1H), 7.99 (d,  $J = 2.4$  Hz, 1H), 8.80 (d,  $J = 2.8$  Hz, 1H).  $^{13}\text{C}$  NMR (100 MHz,  $\text{CDCl}_3$ )  $\delta = 21.6, 107.1, 110.8, 116.7, 127.0, 129.6, 130.1, 130.7, 132.8, 132.9, 133.1, 133.38, 133.42, 134.8, 135.4, 141.6, 142.2, 142.5, 143.6, 144.7$ . HRMS ( $\text{ESI}^+$ ): calcd. for  $\text{C}_{22}\text{H}_{17}\text{BBrF}_2\text{N}_6$   $[\text{M}+\text{H}]^+$ : 493.0754, 495.0733, found: 493.0756, 495.0737.

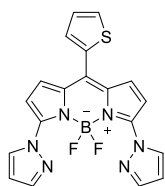

### 3,5-Di(1*H*-pyrazol-1-yl)-8-(thiophen-2-yl)-BODIPY (**3f**)

Following the general procedure, the mixture of 8-(thiophen-2-yl)-BODIPY (**1e**, 13.7 mg, 0.05 mmol), pyrazole (**2a**, 13.6 mg, 0.20 mmol), AgOAc (33.4 mg, 4.0 equiv), DMSO (1.0 mL) was stirred at 80 °C for 12 h. Purification *via* column chromatography on silica gel (petroleum ether/ethyl acetate/dichloromethane = 10/1/10, v/v) afforded the product **3f** (16.2 mg) in 80% yield as a brown solid with a greenish metallic lustre. M.p.: 170-172 °C.  $^1\text{H}$  NMR (400 MHz,  $\text{DMSO}-d_6$ )  $\delta = 6.72$  (dd,  $J = 2.4$  Hz, 1.6 Hz, 2H), 7.03 (d,  $J = 4.8$  Hz, 2H), 7.39-7.41 (m, 3H), 7.77 (d,  $J = 3.6$  Hz, 1H), 7.98 (d,  $J = 1.6$  Hz, 2H), 8.13 (d,  $J = 4.8$  Hz, 1H), 8.61 (d,  $J = 2.8$  Hz, 2H).  $^{13}\text{C}$  NMR (100 MHz,  $\text{DMSO}-d_6$ )  $\delta = 109.7, 113.8, 128.7, 131.0, 131.7, 131.8, 131.9, 132.6, 133.8, 135.6, 143.7, 149.9$ . HRMS ( $\text{ESI}^+$ ): calcd. for  $\text{C}_{19}\text{H}_{13}\text{BF}_2\text{N}_6\text{NaS}$   $[\text{M}+\text{Na}]^+$ : 429.0876, found: 429.0874.

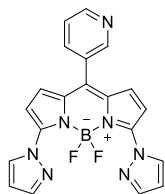

### 3,5-Di(1*H*-pyrazol-1-yl)-8-(pyridin-3-yl)-BODIPY (**3g**)

Following the general procedure, the mixture of 8-(pyridin-3-yl)-BODIPY (**1f**, 13.4 mg, 0.05 mmol), pyrazole (**2a**, 13.6 mg, 0.20 mmol), AgOAc (33.4 mg, 4.0 equiv), DMSO (1.0 mL) was stirred at 80 °C for 12 h. Purification *via* column

chromatography on silica gel (petroleum ether/ethyl acetate/dichloromethane = 5/1/5, v/v) afforded the product **3g** (18.6 mg) in 93% yield as a black powder. M.p.: 165-167 °C. <sup>1</sup>H NMR (400MHz, CDCl<sub>3</sub>)  $\delta$  = 6.56 (dd, *J* = 2.4 Hz, 1.6 Hz, 2H), 6.85 (d, *J* = 4.4 Hz, 2H), 7.04 (d, *J* = 4.4 Hz, 2H), 7.52 (dd, *J* = 7.6 Hz, 4.4 Hz, 2H), 7.82 (d, *J* = 1.6 Hz, 2H), 7.88-7.91 (m, 1H), 8.81-8.84 (m, 4H). <sup>13</sup>C NMR (100 MHz, CDCl<sub>3</sub>)  $\delta$  = 109.5, 114.1, 123.4, 129.8, 130.6, 132.1, 132.2, 132.3, 132.4, 137.9, 143.6, 150.4, 151.5. HRMS (ESI<sup>+</sup>): calcd. for C<sub>20</sub>H<sub>14</sub>BF<sub>2</sub>N<sub>7</sub>Na [M+Na]<sup>+</sup>: 424.1264, found: 424.1265.

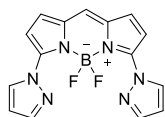

### 3,5-Di(1*H*-pyrazol-1-yl)-8-(*p*-tolyl)-BODIPY (**3h**)

Following the general procedure, the mixture of BODIPY (**1h**, 9.6 mg, 0.05 mmol), pyrazole (**2a**, 13.6 mg, 0.20 mmol), AgOAc (33.4 mg, 4.0 equiv), DMSO (1.0 mL) was stirred at 80 °C for 12 h. Purification *via* column chromatography on silica gel (petroleum ether/ethyl acetate/dichloromethane = 4/1/1, v/v) afforded the product **3h** (6.3 mg) in 39% yield as a brown solid with a greenish metallic lustre. M.p.: 171-173 °C. <sup>1</sup>H NMR (400 MHz, DMSO-*d*<sub>6</sub>)  $\delta$  = 6.73 (dd, *J* = 2.8 Hz, 1.6 Hz, 2H), 7.00 (d, *J* = 4.4 Hz, 2H), 7.53 (d, *J* = 4.4 Hz, 2H), 7.91 (s, 1H), 7.98 (d, *J* = 1.6 Hz, 2H), 8.64 (d, *J* = 2.8 Hz, 2H). <sup>13</sup>C NMR (100 MHz, DMSO-*d*<sub>6</sub>)  $\delta$  = 109.9, 113.2, 129.4, 131.3, 131.4, 131.5, 132.2, 132.3, 143.8, 150.0. HRMS (ESI<sup>+</sup>): calcd. for C<sub>15</sub>H<sub>11</sub>BF<sub>2</sub>N<sub>6</sub>Na<sup>+</sup> [M+Na]<sup>+</sup>: 347.0999, found: 347.0996.

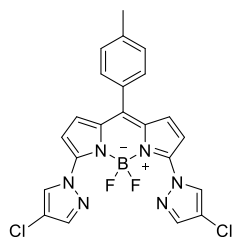

### 3,5-Di(4-chloro-1*H*-pyrazole-1-yl)-8-(*p*-tolyl)-BODIPY (**3i**)

Following the general procedure, the mixture of 8-(*p*-tolyl)-BODIPY (**1a**, 14.1 mg, 0.05 mmol), 4-chloro-1*H*-pyrazole (**2b**, 20.4 mg, 0.20 mmol), AgOAc (33.4 mg, 4.0 equiv), DMSO (1.0 mL) was stirred at 80 °C for 12 h. Purification *via* column chromatography on silica gel (petroleum ether/ethyl acetate/dichloromethane = 20/1/1,

v/v) afforded the product **3i** (22.17 mg) in 92% yield as a golden solid with a greenish metallic lustre. M.p.: 222-224 °C. <sup>1</sup>H NMR (400MHz, CDCl<sub>3</sub>) δ = 2.48 (s, 3H), 6.94 (s, 4H), 7.34 (d, *J* = 8.0 Hz, 2H), 7.43 (d, *J* = 8.0 Hz, 2H), 7.73 (s, 2H), 8.74 (s, 2H). <sup>13</sup>C NMR (100 MHz, CDCl<sub>3</sub>) δ = 21.6, 113.3, 114.3, 129.4, 129.6, 130.5, 130.7, 131.4, 132.6, 141.3, 142.0, 144.5, 150.2. HRMS (ESI<sup>+</sup>): calcd. for C<sub>22</sub>H<sub>16</sub>BCl<sub>2</sub>F<sub>2</sub>N<sub>6</sub> [M+H]<sup>+</sup>: 483.0869, 485.0840 found: 483.0874, 485.0851.

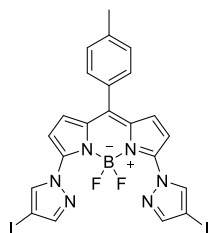

### 3,5-Di(4-iodo-1H-pyrazole-1-yl)-8-(p-tolyl)-BODIPY (**3j**)

Following the general procedure, the mixture of 8-(p-tolyl)-BODIPY (**1a**, 14.1 mg, 0.05 mmol), 4-iodo-1H-pyrazole (**2c**, 38.8 mg, 0.20 mmol), AgOAc (33.4 mg, 4.0 equiv), DMSO (1.0 mL) was stirred at 80 °C for 12 h. Purification *via* column chromatography on silica gel (petroleum ether/ethyl acetate/dichloromethane = 20/1/1, v/v) afforded the product **3j** (27.3 mg) in 82% yield as a brown solid with a greenish metallic lustre. M.p.: 228-230 °C. <sup>1</sup>H NMR (400MHz, CDCl<sub>3</sub>) δ = 2.48 (s, 3H), 6.92-6.95 (m, 4H), 7.34 (d, *J* = 7.6 Hz, 2H), 7.43 (d, *J* = 8.0 Hz, 2H), 7.79 (s, 2H), 8.76 (s, 2H). <sup>13</sup>C NMR (100 MHz, CDCl<sub>3</sub>) δ = 21.6, 61.7, 113.4, 129.4, 130.5, 130.7, 131.4, 132.6, 135.7-136.1 (m), 141.3, 144.5, 148.1, 149.6. HRMS (ESI<sup>+</sup>): calcd. for C<sub>22</sub>H<sub>15</sub>BF<sub>2</sub>I<sub>2</sub>N<sub>6</sub>Na [M+Na]<sup>+</sup>: 688.9401, found: 688.9402.

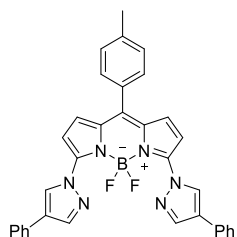

### 3,5-Di(4-phenyl-1H-pyrazol-1-yl)-8-(p-tolyl)-BODIPY (**3k**)

Following the general procedure, the mixture of 8-(p-tolyl)-BODIPY (**1a**, 14.1 mg, 0.05 mmol), 4-phenyl-1H-pyrazol (**2d**, 28.8 mg, 0.20 mmol), AgOAc (33.4 mg, 4.0 equiv), DMSO (1.0 mL) was stirred at 80 °C for 12 h. Purification *via* column chromatography on silica gel (petroleum ether/ethyl acetate/dichloromethane = 20/1/1,

v/v) afforded the product **3k** (16.1 mg) in 57% yield as a black solid with a greenish metallic lustre. M.p.: > 250 °C. <sup>1</sup>H NMR (400MHz, CDCl<sub>3</sub>) δ = 2.49 (s, 3H), 6.95 (d, *J* = 4.4 Hz, 2H), 7.05 (d, *J* = 4.8 Hz, 2H), 7.31-7.36 (m, 4H), 7.41-7.48 (m, 6H), 7.63-7.65 (m, 4H), 8.11 (s, 2H), 9.15 (s, 2H). <sup>13</sup>C NMR (100 MHz, CDCl<sub>3</sub>) δ = 21.6, 113.2, 126.1, 126.2, 127.5, 128.1, 129.2, 129.3, 130.76, 130.80, 131.1, 131.5, 141.0, 141.3, 150.4. HRMS (ESI<sup>+</sup>): calcd. for C<sub>34</sub>H<sub>25</sub>BF<sub>2</sub>N<sub>6</sub>Na [M+Na]<sup>+</sup>: 589.2094, found: 589.2097.

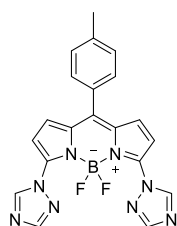

### 3,5-Di(1*H*-1,2,4-triazol-1-yl)-8-(*p*-tolyl)-BODIPY (**3l**)

Following the general procedure, the mixture of 8-(*p*-tolyl)-BODIPY (**1a**, 14.1 mg, 0.05 mmol), 1,2,4-triazol (**2e**, 27.6 mg, 0.20 mmol), AgOAc (33.4 mg, 4.0 equiv), DMSO (1.0 mL) was stirred at 80 °C for 12 h. Purification *via* column chromatography on silica gel (petroleum ether/ethyl acetate/dichloromethane = 20/1/1, v/v) afforded the product **3l** (11.4 mg) in 55% yield as a brown solid with a greenish metallic lustre. M.p.: 229-231 °C. <sup>1</sup>H NMR (400MHz, CDCl<sub>3</sub>) δ = 2.50 (s, 3H), 6.96 (d, *J* = 4.4 Hz, 2H), 7.05 (d, *J* = 4.4 Hz, 2H), 7.38 (d, *J* = 8.0 Hz, 2H), 7.47 (d, *J* = 8.0 Hz, 2H), 8.15 (s, 2H), 9.31 (s, 2H). <sup>13</sup>C NMR (100 MHz, CDCl<sub>3</sub>) δ = 21.7, 114.0, 129.6, 130.0, 130.8, 132.5, 142.1, 145.2, 145.3, 147.3, 153.1. HRMS (ESI<sup>+</sup>): calcd. for C<sub>20</sub>H<sub>16</sub>BF<sub>2</sub>N<sub>8</sub> [M+H]<sup>+</sup>: 417.1554, found: 417.1554.

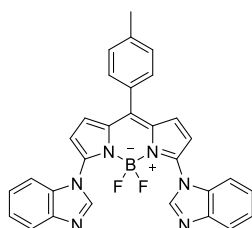

### 3,5-Di(1*H*-benzo[*d*]imidazol-1-yl)-8-(*p*-tolyl)-BODIPY (**3m**)

Following the general procedure, the mixture of 8-(*p*-tolyl)-BODIPY (**1a**, 14.1 mg, 0.05 mmol), benzimidazole (**2f**, 23.6 mg, 0.20 mmol), AgOAc (33.4 mg, 4.0 equiv), DMSO (1.0 mL) was stirred at 80 °C for 12 h. Purification *via* column

chromatography on silica gel (petroleum ether/ethyl acetate/dichloromethane = 20/1/1, v/v) afforded the product **3m** (21.3 mg) in 83% yield as a black solid with a red metallic lustre. M.p.: > 250 °C. <sup>1</sup>H NMR (400MHz, CDCl<sub>3</sub>) δ = 2.53 (s, 3H), 6.75 (d, *J* = 4.4 Hz, 2H), 7.15 (d, *J* = 4.4 Hz, 2H), 7.30-7.36 (m, 4H), 7.42 (d, *J* = 8.0 Hz, 2H), 7.46-7.49 (m, 2H), 7.55 (d, *J* = 8.0 Hz, 2H), 7.85-7.87 (m, 2H), 8.60 (s, 2H). <sup>13</sup>C NMR (100 MHz, CDCl<sub>3</sub>) δ = 21.7, 111.2, 114.3, 121.2, 123.9, 124.4, 129.7, 130.1, 132.4, 133.0, 133.9, 142.1, 143.4, 143.5, 143.6, 143.8, 146.3, 146.5. HRMS (ESI<sup>+</sup>): calcd. for C<sub>30</sub>H<sub>21</sub>BF<sub>2</sub>N<sub>6</sub>Na [M+Na]<sup>+</sup>: 537.1781, found: 537.1780.

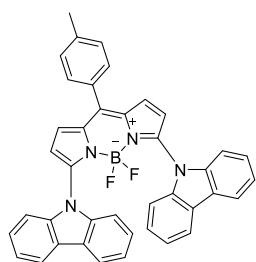

### 3,5-Di(9H-carbazole-9-yl)-8-(p-tolyl)-BODIPY (**3n**)

Following the general procedure, the mixture of 8-(p-tolyl)-BODIPY (**1a**, 14.1 mg, 0.05 mmol), carbazole (**2g**, 33.4 mg, 0.20 mmol), AgOAc (33.4 mg, 4.0 equiv), DMSO (1.0 mL) was stirred at 80 °C for 12 h. Purification *via* column chromatography on silica gel (petroleum ether/ethyl acetate/dichloromethane/Et<sub>3</sub>N = 60/4/4/1, v/v) afforded the product **3n** (23.9 mg) in 78% yield as a black powder. M.p.: > 250 °C. <sup>1</sup>H NMR (400MHz, CDCl<sub>3</sub>) δ = 2.55 (s, 3H), 6.49 (d, *J* = 4.4 Hz, 2H), 7.18-7.22 (m, 6H), 7.30-7.36 (m, 8H), 7.45 (d, *J* = 8.0 Hz, 2H), 7.68 (d, *J* = 8.0 Hz, 2H), 7.94 (d, *J* = 7.6 Hz, 4H). <sup>13</sup>C NMR (100 MHz, CDCl<sub>3</sub>) δ = 21.7, 111.7, 117.4, 120.1, 121.1, 124.4, 126.2, 129.6, 130.5, 131.2, 132.2, 133.9, 141.9, 142.0, 146.8, 150.2. HRMS (ESI<sup>+</sup>): calcd. for C<sub>40</sub>H<sub>27</sub>BF<sub>2</sub>N<sub>4</sub>Na [M+Na]<sup>+</sup>: 635.2189, found: 635.2190.

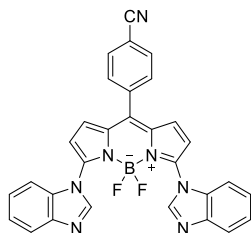

### 3,5-Di(1H-benzo[d]imidazol-1-yl)-8-(p-cyano-phenyl)-BODIPY (**3o**)

Following the general procedure, the mixture of 8-(*p*-cyano-phenyl)-BODIPY (**1c**, 14.6 mg, 0.05 mmol), benzimidazole (**2f**, 23.6 mg, 0.20 mmol), AgOAc (33.4 mg, 4.0 equiv), DMSO (1.0 mL) was stirred at 80 °C for 12 h. Purification *via* column chromatography on silica gel (petroleum ether/ethyl acetate/dichloromethane = 2/1/2, v/v) afforded the product **3o** (15.7 mg) in 60% yield as a red powder. M.p.: > 250 °C. <sup>1</sup>H NMR (400MHz, CDCl<sub>3</sub>) δ = 6.81 (d, *J* = 4.4 Hz, 2H), 7.02 (d, *J* = 4.8 Hz, 2H), 7.32-7.39 (m, 4H), 7.46-7.48 (m, 2H), 7.78 (d, *J* = 8.4 Hz, 2H), 7.87 (dd, *J* = 6.0 Hz, 2.4 Hz, 2H), 7.93 (d, *J* = 8.4 Hz, 2H), 8.62 (s, 2H). <sup>13</sup>C NMR (100 MHz, CDCl<sub>3</sub>) δ = 111.2, 114.97, 115.03, 117.9, 121.3, 124.2, 124.7, 131.3, 131.9, 132.55, 132.64, 133.7, 137.3, 142.2, 143.3, 143.9, 147.6. HRMS (ESI<sup>+</sup>): calcd. for C<sub>30</sub>H<sub>19</sub>BF<sub>2</sub>N<sub>7</sub> [M+H]<sup>+</sup>: 526.1758, found: 526.1761.

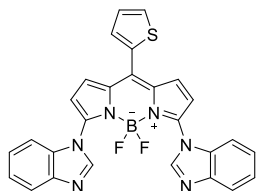

### 3,5-Di(1*H*-benzo[*d*]imidazol-1-yl)-8-(thiophen-2-yl)-BODIPY (**3p**)

Following the general procedure, the mixture of 8-(thiophen-2-yl)-BODIPY (**1e**, 13.7 mg, 0.05 mmol), benzimidazole (**2f**, 23.6 mg, 0.20 mmol), AgOAc (33.4 mg, 4.0 equiv), DMSO (1.0 mL) was stirred at 80 °C for 12 h. Purification *via* column chromatography on silica gel (petroleum ether/ethyl acetate/dichloromethane = 2/1/2, v/v) afforded the product **3p** (5.1 mg) in 20% yield as a black powder. M.p.: 242-244 °C. <sup>1</sup>H NMR (400 MHz, DMSO-*d*<sub>6</sub>) δ = 7.13 (d, *J* = 4.4 Hz, 2H), 7.33-7.39 (m, 4H), 7.50-7.53 (m, 3H), 7.68 (d, *J* = 2.0 Hz, 2H), 7.76-7.79 (m, 2H), 7.96 (s, 1H), 8.30 (d, *J* = 4.4 Hz, 1H), 8.42 (s, 2H). <sup>13</sup>C NMR (100 MHz, DMSO-*d*<sub>6</sub>) δ = 111.4, 115.9, 120.1, 123.5, 124.4, 129.5, 131.7, 132.6, 133.2, 133.8, 134.8, 135.4, 138.6, 142.9, 143.7, 145.8. HRMS (ESI<sup>+</sup>): calcd. for C<sub>27</sub>H<sub>18</sub>BF<sub>2</sub>N<sub>6</sub>S [M+H]<sup>+</sup>: 507.1369, found: 507.1367.

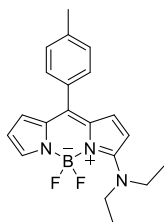

### 3-(Diethylamino)-8-(*p*-tolyl)-BODIPY (**4a**)

Following the general procedure, the mixture of 8-(*p*-tolyl)-BODIPY (**1a**, 14.1 mg, 0.05 mmol), diethylamine (**2h**, 17.4  $\mu$ L, 0.20 mmol), AgOAc (33.4 mg, 4.0 equiv), DMSO (1.0 mL) was stirred at 80  $^{\circ}$ C for 12 h. Purification *via* column chromatography on silica gel (petroleum ether/ethyl acetate/dichloromethane = 10/1/10, v/v) afforded the product **4a** (16.2 mg) in 92% yield as a orange powder. M.p.: 110-112  $^{\circ}$ C.  $^1\text{H}$  NMR (400MHz,  $\text{CDCl}_3$ )  $\delta$  = 1.36 (t,  $J$  = 7.2 Hz, 6H), 2.43 (s, 3H), 3.83 (q,  $J$  = 6.8 Hz, 4H), 6.20 (d,  $J$  = 5.2 Hz, 1H), 6.32 (d,  $J$  = 1.6 Hz, 2H), 6.90 (d,  $J$  = 5.6 Hz, 1H), 7.23-7.25 (m, 2H), 7.34-7.36 (m, 2H), 7.43 (t,  $J$  = 1.6 Hz, 1H).  $^{13}\text{C}$  NMR (100 MHz,  $\text{CDCl}_3$ )  $\delta$  = 13.9, 21.5, 47.0, 113.3, 113.9, 117.7, 128.9, 130.4, 130.5, 131.4, 131.9, 132.6, 135.8, 135.9, 138.9, 162.1. HRMS (ESI $^{+}$ ): calcd. for  $\text{C}_{20}\text{H}_{22}\text{BF}_2\text{N}_3\text{Na}$   $[\text{M}+\text{Na}]^{+}$ : 376.1767, found: 376.1747.

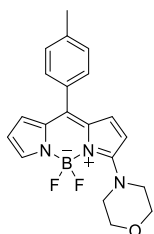

### 3-(4-Morpholino)-8-(*p*-tolyl)-BODIPY (**4b**)

Following the general procedure, the mixture of 8-(*p*-tolyl)-BODIPY (**1a**, 14.1 mg, 0.05 mmol), morpholine (**2i**, 17.4  $\mu$ L, 0.20 mmol), AgOAc (33.4 mg, 4.0 equiv), DMSO (1.0 mL) was stirred at 80  $^{\circ}$ C for 12 h. Purification *via* column chromatography on silica gel (petroleum ether/ethyl acetate/dichloromethane = 10/1/10, v/v) afforded the product **4b** (18.1 mg) in 99% yield as a orange powder. M.p.: 183-185  $^{\circ}$ C.  $^1\text{H}$  NMR (400MHz,  $\text{DMSO}-d_6$ )  $\delta$  = 2.40 (s, 3H), 3.77 (t,  $J$  = 4.8 Hz, 4H), 4.00 (t,  $J$  = 4.4 Hz, 4H), 6.21 (dd,  $J$  = 3.6 Hz, 0.8 Hz, 1H), 6.28 (dd,  $J$  = 3.6 Hz, 2.4 Hz, 1H), 6.82 (d,  $J$  = 5.2 Hz, 1H), 6.98 (d,  $J$  = 5.2 Hz, 1H), 7.30 (dd,  $J$  = 2.4 Hz, 1.6 Hz, 1H), 7.33 (d,  $J$  = 8.0 Hz, 2H), 7.37 (d,  $J$  = 8.4 Hz, 2H).  $^{13}\text{C}$  NMR (100

MHz, DMSO-*d*<sub>6</sub>)  $\delta$  = 20.9, 50.4, 66.2, 113.1, 115.8, 116.8, 129.0, 129.7, 130.1, 130.2, 130.9, 131.6, 134.9, 135.5, 138.7, 161.8. HRMS (ESI<sup>+</sup>): calcd. for C<sub>20</sub>H<sub>21</sub>BF<sub>2</sub>N<sub>3</sub>O [M+H]<sup>+</sup>: 368.1740, found: 368.1710.

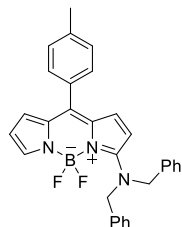

### 3-(*N,N*-dibenzylamino)-8-(*p*-tolyl)-BODIPY (**4c**)

Following the general procedure, the mixture of 8-(*p*-tolyl)-BODIPY (**1a**, 14.1 mg, 0.05 mmol), dibenzylamine (**2j**, 38.4  $\mu$ L, 0.20 mmol), AgOAc (33.4 mg, 4.0 equiv), DMSO (1.0 mL) was stirred at 80 °C for 12 h. Purification *via* column chromatography on silica gel (petroleum ether/ethyl acetate/dichloromethane = 10/1/10, v/v) afforded the product **4c** (23.8 mg) in 99% yield as a orange crystal. M.p.: 131-133 °C. <sup>1</sup>H NMR (400 MHz, DMSO-*d*<sub>6</sub>)  $\delta$  = 2.40 (s, 3H), 5.05 (s, 4H), 6.25 (dd, *J* = 4.0 Hz, 1.2 Hz, 1H), 6.30 (dd, *J* = 3.6 Hz, 2.4 Hz, 1H), 6.70 (d, *J* = 5.6 Hz, 1H), 6.98 (d, *J* = 5.2 Hz, 1H), 7.27-7.34 (m, 9H), 7.36-7.41 (m, 6H). <sup>13</sup>C NMR (100 MHz, DMSO-*d*<sub>6</sub>)  $\delta$  = 20.9, 54.9, 113.5, 116.6, 117.6, 127.0, 127.6, 128.8, 129.0, 130.2, 130.4, 131.0, 131.2, 131.5, 134.9, 135.9, 136.5, 138.8, 163.8. HRMS (ESI<sup>+</sup>): calcd. for C<sub>30</sub>H<sub>26</sub>BF<sub>2</sub>N<sub>3</sub>Na [M+Na]<sup>+</sup>: 500.2080, found: 500.2076.

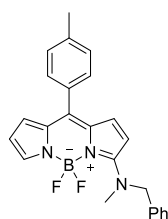

### 3-(*N*-benzyl-*N*-methylamino)-8-(*p*-tolyl)-BODIPY (**4d**)

Following the general procedure, the mixture of 8-(*p*-tolyl)-BODIPY (**1a**, 14.1 mg, 0.05 mmol), *N*-methylbenzylamine (**2k**, 25.8  $\mu$ L, 0.20 mmol), AgOAc (33.4 mg, 4.0 equiv), DMSO (1.0 mL) was stirred at 80 °C for 12 h. Purification *via* column chromatography on silica gel (petroleum ether/ethyl acetate/dichloromethane = 10/1/1, v/v) afforded the product **4d** (20.0 mg) in 99% yield as a orange powder. M.p.: 100-102 °C. <sup>1</sup>H NMR (400 MHz, DMSO-*d*<sub>6</sub>)  $\delta$  = 2.40 (s, 3H), 3.48 (s, 3H), 5.02 (s,

2H), 6.21 (d,  $J = 3.2$  Hz, 1H), 6.29 (dd,  $J = 3.6$  Hz, 2.4 Hz, 1H), 6.76 (d,  $J = 5.2$  Hz, 1H), 6.97 (d,  $J = 5.2$  Hz, 1H), 7.27 (d,  $J = 7.2$  Hz, 2H), 7.32 (d,  $J = 8.4$  Hz, 4H), 7.37-7.42 (m, 4H).  $^{13}\text{C}$  NMR (100 MHz, DMSO- $d_6$ )  $\delta = 20.9, 58.2, 113.0, 116.4, 116.5, 126.8, 127.6, 128.8, 129.0, 129.5, 130.0, 130.1, 130.9, 131.6, 135.1, 135.6, 136.3, 138.6, 163.6$ . HRMS (ESI $^+$ ): calcd. for  $\text{C}_{24}\text{H}_{22}\text{BF}_2\text{N}_3\text{Na}$   $[\text{M}+\text{Na}]^+$ : 424.1767, found: 424.1750.

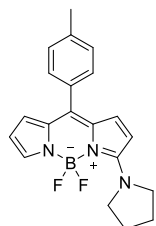

### 3-(Pyrrolidin-1-yl)-8-(*p*-tolyl)-BODIPY (**4e**)

Following the general procedure, the mixture of 8-(*p*-tolyl)-BODIPY (**1a**, 14.1 mg, 0.05 mmol), tetrahydro pyrrole (**2l**, 16.4  $\mu\text{L}$ , 0.20 mmol), AgOAc (33.4 mg, 4.0 equiv), DMSO (1.0 mL) was stirred at 80  $^{\circ}\text{C}$  for 12 h. Purification *via* column chromatography on silica gel (petroleum ether/ethyl acetate/dichloromethane = 10/1/10, v/v) afforded the product **4e** (13.1 mg) in 75% yield as a black powder. M.p.: > 250  $^{\circ}\text{C}$ .  $^1\text{H}$  NMR (400 MHz, DMSO- $d_6$ )  $\delta = 2.00$  (s, 4H), 2.40 (s, 3H), 3.89 (s, 4H), 6.17 (d,  $J = 3.2$  Hz, 1H), 6.26 (dd,  $J = 3.6$  Hz, 2.4 Hz, 1H), 6.60 (d,  $J = 5.2$  Hz, 1H), 6.97 (d,  $J = 5.2$  Hz, 1H), 7.27 (dd,  $J = 2.4$  Hz, 1.6 Hz, 1H), 7.31-7.38 (m, 4H).  $^{13}\text{C}$  NMR (100 MHz,  $\text{CDCl}_3$ )  $\delta = 21.5, 25.8, 51.5, 113.1, 114.5, 117.6, 128.9, 130.1, 130.5, 131.3, 132.0, 132.5, 135.5, 135.6, 138.8, 160.4$ . HRMS (ESI $^+$ ): calcd. for  $\text{C}_{20}\text{H}_{21}\text{BF}_2\text{N}_3$   $[\text{M}+\text{H}]^+$ : 352.1791, found: 352.1789.

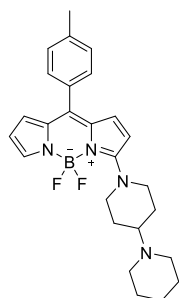

### 3-[(1,4'-Bipiperidin)-1'-yl]-8-(*p*-tolyl)-BODIPY (**4f**)

Following the general procedure, the mixture of 8-(*p*-tolyl)-BODIPY (**1a**, 14.1 mg,

0.05 mmol), 4-piperidinopiperidine (**2m**, 16.4  $\mu$ L, 0.20 mmol), AgOAc (33.4 mg, 4.0 equiv), DMSO (1.0 mL) was stirred at 80  $^{\circ}$ C for 12 h. Purification *via* column chromatography on silica gel (MeOH/dichloromethane = 1/30, v/v) afforded the product **4f** (22.3 mg) in 99% yield as a orange powder. M.p.: 174-176  $^{\circ}$ C.  $^1$ H NMR (400 MHz, DMSO- $d_6$ )  $\delta$  = 1.37 (d,  $J$  = 4.8 Hz, 2H), 1.47 (d,  $J$  = 4.8 Hz, 4H), 1.54-1.61 (m, 2H), 1.87 (d,  $J$  = 10.8 Hz, 2H), 2.39 (s, 3H), 2.43-2.45 (m, 4H), 2.61 (t,  $J$  = 11.2 Hz, 1H), 3.29 (d,  $J$  = 12.0 Hz, 2H), 4.62 (d,  $J$  = 12.8 Hz, 2H), 6.17-6.18 (m, 1H), 6.26-6.27 (m, 1H), 6.82 (d,  $J$  = 5.6 Hz, 1H), 6.94 (d,  $J$  = 5.2 Hz, 1H), 7.28 (dd,  $J$  = 2.0 Hz, 1.2 Hz, 1H), 7.31-7.37 (m, 4H).  $^{13}$ C NMR (100 MHz, DMSO- $d_6$ )  $\delta$  = 20.9, 24.6, 26.1, 28.3, 49.7, 49.8, 60.7, 112.9, 116.1, 116.3, 129.0, 129.2, 130.1, 131.0, 131.7, 135.1, 135.6, 138.6, 161.6. HRMS (ESI $^{+}$ ): calcd. for C<sub>26</sub>H<sub>32</sub>BF<sub>2</sub>N<sub>4</sub> [M+H] $^{+}$ : 449.2683, found: 449.2681.

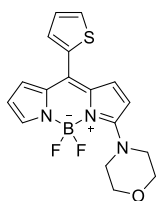

### 3-(4-Morpholino)-8-(thiophen-2-yl)-BODIPY (**4g**)

Following the general procedure, the mixture of 8-(thiophen-2-yl)-BODIPY (**1e**, 13.7 mg, 0.05 mmol), morpholine (**2i**, 17.4  $\mu$ L, 0.20 mmol), AgOAc (33.4 mg, 4.0 equiv), DMSO (1.0 mL) was stirred at 80  $^{\circ}$ C for 12 h. Purification *via* column chromatography on silica gel (petroleum ether/ethyl acetate/dichloromethane = 10/1/10, v/v) afforded the product **4g** (15.2 mg) in 85% yield as a red crystal. M.p.: 134-136  $^{\circ}$ C.  $^1$ H NMR (400 MHz, CDCl<sub>3</sub>)  $\delta$  = 3.88-3.91 (m, 4H), 3.95-3.98 (m, 4H), 6.26 (d,  $J$  = 5.2 Hz, 1H), 6.38 (dd,  $J$  = 4.0 Hz, 2.4 Hz, 1H), 6.72 (d,  $J$  = 4.0 Hz, 1H), 7.15 (dd,  $J$  = 5.2 Hz, 3.6 Hz, 1H), 7.22 (d,  $J$  = 5.2 Hz, 1H), 7.30 (dd,  $J$  = 3.2 Hz, 1.2 Hz, 1H), 7.45 (dd,  $J$  = 2.4 Hz, 1.2 Hz, 1H), 7.50 (dd,  $J$  = 5.2 Hz, 1.6 Hz, 1H).  $^{13}$ C NMR (100 MHz, CDCl<sub>3</sub>)  $\delta$  = 50.7, 50.76, 50.82, 66.9, 113.0, 114.0, 119.6, 126.0, 127.3, 128.1, 130.4, 131.5, 132.0, 135.5, 135.7, 136.0, 162.3. HRMS (ESI $^{+}$ ): calcd. for C<sub>17</sub>H<sub>16</sub>BF<sub>2</sub>N<sub>3</sub>NaOS [M+Na] $^{+}$ : 382.0967, found: 382.0973.

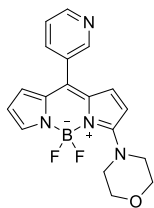

### 3-(4-Morpholino)-8-(pyridin-3-yl)-BODIPY (4h)

Following the general procedure, the mixture of 8-(pyridin-3-yl)-BODIPY (**1f**, 13.4 mg, 0.05 mmol), morpholine (**2i**, 17.4  $\mu$ L, 0.20 mmol), AgOAc (33.4 mg, 4.0 equiv), DMSO (1.0 mL) was stirred at 80  $^{\circ}$ C for 12 h. Purification *via* column chromatography on silica gel (petroleum ether/ethyl acetate/dichloromethane/Et<sub>3</sub>N = 5/1/5/1, v/v) afforded the product **4h** (17.5 mg) in 99% yield as a orange crystal. M.p.: 172-174  $^{\circ}$ C. <sup>1</sup>H NMR (400 MHz, CDCl<sub>3</sub>)  $\delta$  = 3.89-3.91 (m, 4H), 3.98-4.01 (m, 4H), 6.30 (d, *J* = 5.2 Hz, 1H), 6.33-6.38 (m, 2H), 6.85 (d, *J* = 5.2 Hz, 1H), 7.40-7.44 (m, 1H), 7.47 (d, *J* = 0.8 Hz, 1H), 7.80-7.83 (m, 1H), 8.69-8.73 (m, 2H). <sup>13</sup>C NMR (100 MHz, CDCl<sub>3</sub>)  $\delta$  = 50.6, 50.65, 50.70, 66.8, 113.7, 114.1, 118.8, 123.1, 128.9, 131.0, 131.4, 132.0, 135.1, 135.3, 137.6, 150.2, 150.4, 162.2. HRMS (ESI<sup>+</sup>): calcd. for C<sub>18</sub>H<sub>18</sub>BF<sub>2</sub>N<sub>4</sub>O [M+H]<sup>+</sup>: 355.1536, found: 355.1535.

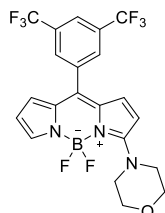

### 3-(4-Morpholino)-8-(3,5-bis(trifluoromethyl)phenyl)-BODIPY (4i)

Following the general procedure, the mixture of 8-(3,5-bis(trifluoromethyl)phenyl)-BODIPY (**1d**, 20.2 mg, 0.05 mmol), morpholine (**2i**, 17.4  $\mu$ L, 0.20 mmol), AgOAc (33.4 mg, 4.0 equiv), DMSO (1.0 mL) was stirred at 80  $^{\circ}$ C for 12 h. Purification *via* column chromatography on silica gel (petroleum ether/ethyl acetate/dichloromethane = 10/1/10, v/v) afforded the product **4i** (19.5 mg) in 80% yield as a orange crystal. M.p.: 228-231  $^{\circ}$ C. <sup>1</sup>H NMR (400 MHz, CDCl<sub>3</sub>)  $\delta$  = 3.89-3.92 (m, 4H), 4.01-4.03 (m, 4H), 6.26 (d, *J* = 3.6 Hz, 1H), 6.35 (d, *J* = 5.2 Hz, 1H), 6.39 (dd, *J* = 3.6 Hz, 2.4 Hz, 1H), 6.77 (d, *J* = 5.2 Hz, 1H), 7.49 (dd, *J* = 2.0 Hz, 1.2 Hz, 1H), 7.94 (s, 2H), 8.00 (s, 1H). <sup>13</sup>C NMR (100 MHz, CDCl<sub>3</sub>)  $\delta$  = 50.9, 66.9,

114.5, 114.6, 118.7, 123.2 (q,  $J_{\text{C-F}} = 273.0$  Hz), 128.8, 129.9-130.1 (m), 130.47-130.50 (m), 131.0, 132.0 (q,  $J = 33.7$  Hz), 131.0, 132.5, 134.8, 135.4, 137.3, 162.4. HRMS (ESI<sup>+</sup>): calcd. for C<sub>21</sub>H<sub>17</sub>BF<sub>8</sub>N<sub>3</sub>O [M+H]<sup>+</sup>: 490.1331, found: 490.1316.

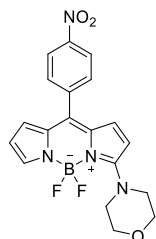

### 3-(4-Morpholino)-8-(4-nitrophenyl)BODIPY (**4j**)

Following the general procedure, the mixture of 8-(4-nitrophenyl)BODIPY (**1i**, 15.7 mg, 0.05 mmol), morpholine (**2i**, 17.4  $\mu$ L, 0.10 mmol), AgOAc (33.4 mg, 4.0 equiv), DMSO (1.0 mL) was stirred at 80 °C for 12 h. Purification *via* column chromatography on silica gel (petroleum ether/ethyl acetate/dichloromethane = 1/1/1, v/v) afforded the product **4j** (17.2 mg) in 86% yield as a orange powder. M.p.: > 250 °C. <sup>1</sup>H NMR (400 MHz, DMSO-*d*<sub>6</sub>)  $\delta$  = 3.79 (t,  $J = 4.4$  Hz, 4H), 4.05 (t,  $J = 4.4$  Hz, 4H), 6.19 (d,  $J = 2.8$  Hz, 1H), 6.30 (dd,  $J = 3.6$  Hz, 2.4 Hz, 1H), 6.94 (d,  $J = 5.6$  Hz, 1H), 7.03 (d,  $J = 5.6$  Hz, 1H), 7.33 (dd,  $J = 2.4$  Hz, 1.2 Hz, 1H), 7.75-7.79 (m, 2H), 8.33-8.37 (m, 2H). <sup>13</sup>C NMR (100 MHz, DMSO-*d*<sub>6</sub>)  $\delta$  = 50.7, 66.3, 113.4, 116.3, 117.3, 123.6, 127.0, 129.8, 130.1, 131.7, 141.2, 147.7, 162.1. HRMS (ESI<sup>+</sup>): calcd. for C<sub>19</sub>H<sub>17</sub>BF<sub>2</sub>N<sub>4</sub>NaO<sub>3</sub><sup>+</sup> [M+Na]<sup>+</sup>: 421.1254, found: 421.1254.

### (3) The procedure for double-amination of BODIPYs with morpholine

A dried Schlenk tube with a magnetic stir bar was charged with BODIPY (0.1 mmol), morpholine (0.40 mmol, 4.0 equiv) and AgOAc (4.0 equiv). The system was evacuated thrice and back filled with N<sub>2</sub>. Next, the solvent DMSO was added *via* a syringe and the rubber septum was replaced with a polytetrafluoroethylene stopper under N<sub>2</sub>. Then the reaction mixture was stirred at the 80 °C for 12 h in an oil bath. After the reaction mixture was cooled to ambient temperature, the solvent was removed under reduced pressure. The residue was dissolved in 10 mL of CH<sub>2</sub>Cl<sub>2</sub>, filtered through a celite pad, and then washed with 20-30 mL of CH<sub>2</sub>Cl<sub>2</sub>. The combined filtrates were concentrated and purified *via* column chromatography on

silica gel (100-200 mesh) to provide the desired products.

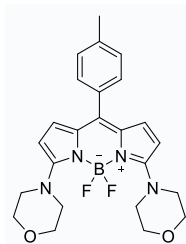

### 3,5-Di(4-morpholino)-8-(*p*-tolyl)-BODIPY (**3q**)

Following the general procedure, the mixture of 8-(*p*-tolyl)-BODIPY (**1a**, 28.2 mg, 0.10 mmol), morpholine (**2i**, 34.8  $\mu$ L, 0.20 mmol), AgOAc (66.8 mg, 4.0 equiv), DMSO (1.0 mL) was stirred at 80  $^{\circ}$ C for 12 h. Purification *via* column chromatography on silica gel (petroleum ether/ethyl acetate/dichloromethane = 10/1/10, v/v) afforded the product **3q** (8.1 mg) in 18% yield as a black powder. M.p.: 215-217  $^{\circ}$ C.  $^1\text{H}$  NMR (400 MHz, DMSO- $d_6$ )  $\delta$  = 2.39 (s, 3H), 3.49 (t,  $J$  = 4.8 Hz, 8H), 3.72 (t,  $J$  = 4.8 Hz, 8H), 6.25 (d,  $J$  = 4.8 Hz, 2H), 6.52 (d,  $J$  = 4.8 Hz, 2H), 7.29-7.34 (m, 4H).  $^{13}\text{C}$  NMR (100 MHz, DMSO- $d_6$ )  $\delta$  = 21.0, 51.2, 66.1, 108.1, 127.2, 128.9, 130.3, 130.5, 131.4, 131.5, 138.7, 159.2. HRMS (ESI $^{+}$ ): calcd. for  $\text{C}_{24}\text{H}_{27}\text{BF}_2\text{N}_4\text{NaO}_2$  [ $\text{M}+\text{Na}$ ] $^{+}$ : 475.2087, found: 475.2085.

### (4) The procedure for amination of 3-(4-morpholino)-8-(*p*-tolyl)-BODIPY with **2a** or **2f**

A dried Schlenk tube with a magnetic stir bar was charged with 3-(4-morpholino)-8-(*p*-tolyl)-BODIPY (**4b**, 0.05 mmol), **2a** or **2f** (0.20 mmol, 4.0 equiv) and AgOAc (33.4 mg, 4.0 equiv). The system was evacuated thrice and back filled with  $\text{N}_2$ . Next, the solvent DMSO/ $\text{H}_2\text{O}$ /HOAc was added sequence *via* a syringe and the rubber septum was replaced with a polytetrafluoroethylene stopper under  $\text{N}_2$ . Then the reaction mixture was stirred at the 80  $^{\circ}$ C for 12 h in an oil bath. After the reaction mixture was cooled to ambient temperature, the solvent was removed under reduced pressure. The residue was dissolved in 10 mL of  $\text{CH}_2\text{Cl}_2$ , filtered through a celite pad, and then washed with 20-30 mL of  $\text{CH}_2\text{Cl}_2$ . The combined filtrates were concentrated and purified *via* column chromatography on silica gel (100-200 mesh) to provide the desired products.

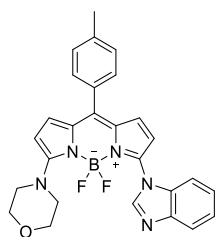

### 3-(1H-Benzo[d]imidazol-1-yl)-5-(4-morpholino)-8-(p-tolyl)-BODIPY (**5a**)

Following the general procedure, the mixture of 3-(4-morpholino)-8-(p-tolyl)-BODIPY (**4b**, 17.9 mg, 0.05 mmol), benzimidazole (**2f**, 23.6 mg, 0.20 mmol), AgOAc (33.4 mg, 4.0 equiv), DMSO (0.5 mL)/H<sub>2</sub>O (0.5 mL)/HOAc (0.5 mL) was stirred at 80 °C for 12 h. Purification *via* column chromatography on silica gel (petroleum ether/ethyl acetate/dichloromethane = 1/1/1, v/v) afforded the product **5a** (6.0 mg) in 25% yield as a black solid. M.p.: > 250 °C. <sup>1</sup>H NMR (400 MHz, DMSO-*d*<sub>6</sub>) δ = 2.42 (s, 3H), 3.66-3.68 (m, 4H), 3.86-3.88 (m, 4H), 6.35 (d, *J* = 4.0 Hz, 1H), 6.46 (d, *J* = 4.0 Hz, 1H), 6.93 (d, *J* = 5.6 Hz, 1H), 7.04 (d, *J* = 5.6 Hz, 1H), 7.25-7.31 (m, 3H), 7.37 (d, *J* = 8.0 Hz, 2H), 7.44 (d, *J* = 8.0 Hz, 2H), 7.71-7.75 (m, 1H), 8.31 (s, 1H). <sup>13</sup>C NMR (100 MHz, DMSO-*d*<sub>6</sub>) δ = 21.0, 50.6, 66.1, 110.7, 110.9, 115.8, 117.5, 119.5, 122.2, 123.3, 128.8, 129.2, 130.1, 130.3, 130.9, 132.2, 135.7, 135.8, 138.9, 142.5, 144.9, 162.1. HRMS (ESI<sup>+</sup>): calcd. for C<sub>27</sub>H<sub>25</sub>BF<sub>2</sub>N<sub>5</sub>O [M+H]<sup>+</sup>: 484.2115, found: 484.2123.

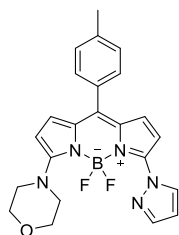

### 3-(1H-Pyrazol-1-yl)-5-(4-morpholino)-8-(p-tolyl)-BODIPY (**5b**)

Following the general procedure, the mixture of 3-(4-morpholino)-8-(p-tolyl)-BODIPY (**4b**, 17.9 mg, 0.05 mmol), pyrazole (**2a**, 13.6 mg, 0.20 mmol), AgOAc (33.4 mg, 4.0 equiv), DMSO (0.5 mL)/H<sub>2</sub>O (0.5 mL)/HOAc (0.5 mL) was stirred at 80 °C for 12 h. Purification *via* column chromatography on silica gel (petroleum ether/ethyl acetate/dichloromethane = 5/1/5, v/v) afforded the product **5b** (6.9 mg) in 32% yield as a brown solid with a greenish metallic lustre. M.p.: 195-197 °C. <sup>1</sup>H NMR (400 MHz, DMSO-*d*<sub>6</sub>) δ = 2.41 (s, 3H), 3.74 (t, *J* = 4.8

Hz, 4H), 3.95 (t,  $J = 4.8$  Hz, 4H), 6.25 (d,  $J = 3.6$  Hz, 1H), 6.38 (d,  $J = 4.0$  Hz, 1H), 6.48 (dd,  $J = 2.8$  Hz, 2.0 Hz, 1H), 6.88 (d,  $J = 5.6$  Hz, 1H), 6.98 (d,  $J = 5.2$  Hz, 1H), 7.34-7.40 (m, 4H), 7.68 (d,  $J = 2.0$  Hz, 1H), 8.17 (d,  $J = 2.4$  Hz, 1H).  $^{13}\text{C}$  NMR (100 MHz, DMSO- $d_6$ )  $\delta = 21.0, 50.6, 66.2, 106.5, 109.0, 116.8, 129.1, 129.4, 131.1, 131.7, 131.8, 131.9, 134.7, 135.3, 138.8, 139.4, 140.5, 161.9$ . HRMS (ESI $^+$ ): calcd. for  $\text{C}_{23}\text{H}_{23}\text{BF}_2\text{N}_5\text{O}$   $[\text{M}+\text{H}]^+$ : 434.1958, found: 434.1933.

#### (5) Synthesis of 8-(pyridin-3-yl)-BODIPY (1f) substrates

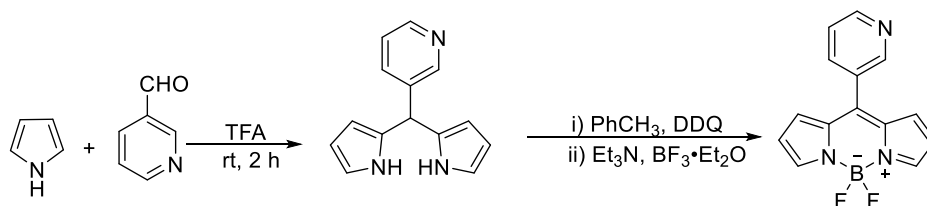

A 250 mL flask was charged with pyrrole (1.2 mol) and 3-pyridinecarboxaldehyde (60 mmol), stirred at room temperature for 10 min under N<sub>2</sub> atmosphere without the light, and then, trifluoroacetic acid (1.5 mL) was added. The mixture was stirred for 4 h. Upon completion of the reaction by TLC assay, the dilute NaOH (0.1 mol/L) was added to quench the reaction. The product was extracted with ethyl acetate, dried over anhydrous Na<sub>2</sub>SO<sub>4</sub>. After removal of the solvent under reduced pressure, the residue was purified *via* silica gel column chromatography (petroleum ether/dichloromethane = 1/1, v/v) to give the corresponding dipyrromethanes.

Then a 250 mL flask was charged with the corresponding dipyrromethanes (30 mmol), DDQ (1.2 equiv) and toluene (120 mL). The mixture was stirred for 3 h at room temperature under N<sub>2</sub> atmosphere. And then Et<sub>3</sub>N (30 mL) and BF<sub>3</sub>·Et<sub>2</sub>O (28 mL) was added to the reaction. The mixture was stirred for another 11 h. The product was extracted with ethyl acetate, dried over anhydrous Na<sub>2</sub>SO<sub>4</sub>. After removal of the solvent under reduced pressure, the residue was purified *via* silica gel column chromatography (petroleum ether/dichloromethane = 1/1, v/v) to give the 8-(pyridin-3-yl)-BODIPY Yield: (5 %).  $^1\text{H}$  NMR (400 MHz, CDCl<sub>3</sub>)  $\delta = 6.58$  (s, 2H), 6.90 (s, 2H), 7.48-7.53 (m, 1H), 7.88-7.92 (m, 1H), 7.98 (s, 2H), 8.81-8.84 (m, 2H).  $^{13}\text{C}$  NMR (100 MHz, CDCl<sub>3</sub>)  $\delta = 119.3, 123.4, 130.0, 131.4, 135.0, 137.7, 143.3,$

145.2, 150.2, 151.8. HRMS (ESI<sup>+</sup>): calcd. for C<sub>14</sub>H<sub>11</sub>BF<sub>2</sub>N<sub>3</sub> [M+H]<sup>+</sup>: 270.1014, found: 270.1007.

### III. Single crystal X-ray structures of **3m** and **4b**

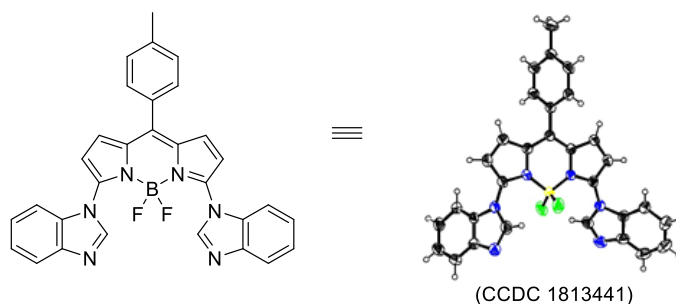

**Fig. S1** ORTEP diagram of **3m**.

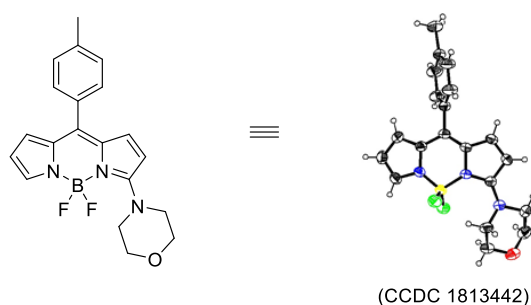

**Fig. S2** ORTEP diagram of **4b**.

### IV. Mechanistic study

#### General procedure for direct C–H amination of BODIPYs in the presence of radical scavenger

A dried Schlenk tube with a magnetic stir bar was charged with 8-(*p*-tolyl)-BODIPY (**1a**, 14.1 mg, 0.05 mmol), pyrazole (**2a**, 13.6 mg, 0.20 mmol), AgOAc (33.4 mg, 4.0 equiv) and the radical scavenger. The system was evacuated thrice and back filled with N<sub>2</sub>. Next, the solvent DMSO was added *via* a syringe and the rubber septum was replaced with a polytetrafluoroethylene stopper under N<sub>2</sub>. Then the reaction mixture was stirred at the 80 °C for 12 h in an oil bath. After the reaction mixture was cooled to ambient temperature, the solvent was removed under reduced pressure. The residue was dissolved in 10 mL of CH<sub>2</sub>Cl<sub>2</sub>, filtered through a celite pad, and then washed with

20-30 mL of CH<sub>2</sub>Cl<sub>2</sub>. The combined filtrates were concentrated and purified *via* column chromatography on silica gel (100-200 mesh) to provide the desired products.

**Table S2. Direct C–H amination of BODIPYs in the presence of radical scavenger<sup>a</sup>**

| Entry | Radical Scavenger | Equivalent | Yield (%) <sup>b</sup> |
|-------|-------------------|------------|------------------------|
| 1     | TEMPO             | 2          | 37                     |
| 2     | TEMPO             | 1          | 58                     |
| 3     | TEMPO             | 0.5        | 68                     |
| 4     | BHT               | 2          | 19                     |
| 5     | BHT               | 1          | 39                     |
| 6     | BHT               | 0.5        | 50                     |
| 7     | ascorbic acid     | 2          | 0                      |
| 8     | ascorbic acid     | 1          | 0                      |
| 9     | ascorbic acid     | 0.5        | 14                     |

<sup>a</sup>Reaction conditions: 8-(*p*-Tolyl)-BODIPY (**1a**, 0.05 mmol), pyrazole (**2a**, 4.0 equiv), AgOAc (4.0 equiv) and solvent (1.0 mL) at 80 °C for 12 h under N<sub>2</sub>. <sup>b</sup>Isolated yields. TEMPO = 2,2,6,6-tetramethyl-1-piperidinyloxy; BHT = 2,6-*di*-tert-butyl-4-methylphenol.

## V. Photophysical data of BODIPYs

**Table S3. Absorption maxima, emission maxima, Stokes shifts and fluorescence quantum yields of BODIPYs**

| Compd.    | $\lambda_{\text{abs}}$ (nm) <sup>a</sup> | $\lambda_{\text{em}}$ (nm) <sup>b</sup> | $(\Phi_f)^c$                       | Stokes Shift<br>(nm) |
|-----------|------------------------------------------|-----------------------------------------|------------------------------------|----------------------|
|           | in CH <sub>2</sub> Cl <sub>2</sub>       | in CH <sub>2</sub> Cl <sub>2</sub>      | in CH <sub>2</sub> Cl <sub>2</sub> |                      |
| <b>1a</b> | 499                                      | 520                                     | 0.01                               | 21                   |
| <b>3a</b> | 559                                      | 578                                     | 0.60                               | 19                   |
| <b>3b</b> | 560                                      | 579                                     | 0.64                               | 19                   |
| <b>3c</b> | 568                                      | 591                                     | 0.18                               | 23                   |
| <b>3d</b> | 571                                      | 587                                     | 0.44                               | 16                   |
| <b>3e</b> | 540                                      | 577                                     | 0.30                               | 37                   |
| <b>3f</b> | 571                                      | 591                                     | 0.03                               | 20                   |
| <b>3g</b> | 565                                      | 585                                     | 0.68                               | 20                   |

|           |     |     |        |    |
|-----------|-----|-----|--------|----|
| <b>3h</b> | 562 | 578 | 0.81   | 16 |
| <b>3i</b> | 562 | 579 | 0.76   | 17 |
| <b>3j</b> | 565 | 585 | 0.72   | 20 |
| <b>3k</b> | 584 | 606 | 0.80   | 22 |
| <b>3l</b> | 540 | 559 | 0.69   | 19 |
| <b>3m</b> | 546 | 576 | 0.20   | 30 |
| <b>3n</b> | 564 | 636 | < 0.01 | 72 |
| <b>3o</b> | 561 | 592 | 0.07   | 31 |
| <b>3p</b> | 559 | 590 | 0.01   | 31 |
| <b>3q</b> | 570 | 604 | < 0.01 | 34 |
| <b>4a</b> | 473 | 552 | < 0.01 | 79 |
| <b>4b</b> | 488 | 547 | < 0.01 | 59 |
| <b>4c</b> | 501 | 548 | < 0.01 | 47 |
| <b>4d</b> | 489 | 548 | < 0.01 | 59 |
| <b>4e</b> | 473 | 541 | < 0.01 | 68 |
| <b>4f</b> | 481 | 554 | < 0.01 | 73 |
| <b>4g</b> | 496 | 564 | < 0.01 | 68 |
| <b>4h</b> | 487 | 557 | < 0.01 | 70 |
| <b>4i</b> | 491 | 562 | < 0.01 | 71 |
| <b>4j</b> | 496 | 570 | < 0.01 | 74 |
| <b>5a</b> | 484 | 564 | 0.01   | 80 |
| <b>5b</b> | 502 | 581 | < 0.01 | 79 |

<sup>a</sup>Absorption maximum in CH<sub>2</sub>Cl<sub>2</sub> at 1×10<sup>-5</sup> mol/L. <sup>b</sup>Emission maximum in CH<sub>2</sub>Cl<sub>2</sub> at 1×10<sup>-5</sup> mol/L. <sup>c</sup>Absolute quantum yield determined in CH<sub>2</sub>Cl<sub>2</sub> at 1×10<sup>-5</sup> mol/L with an integrating sphere system.

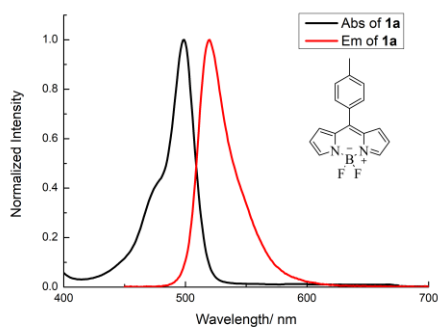

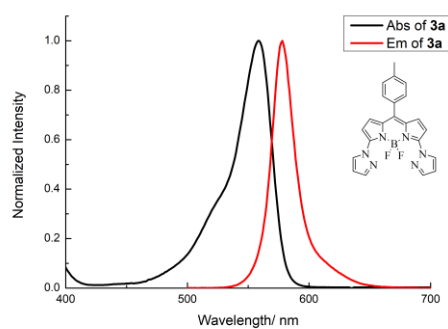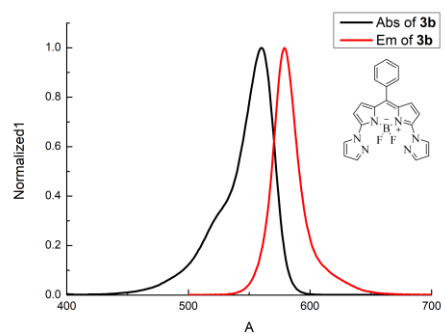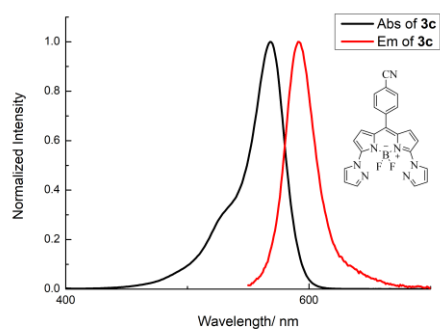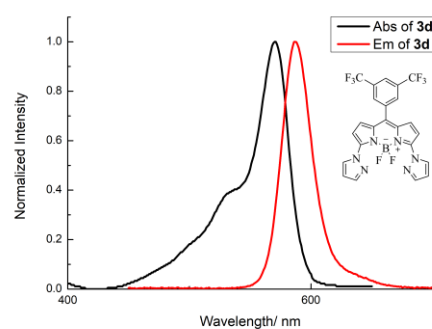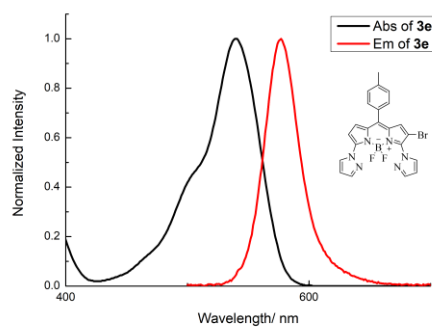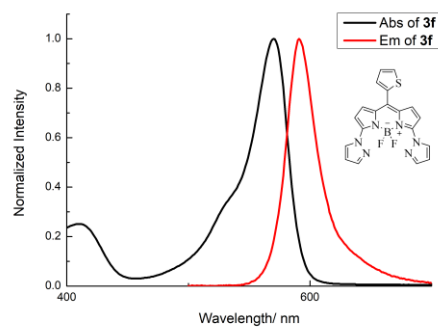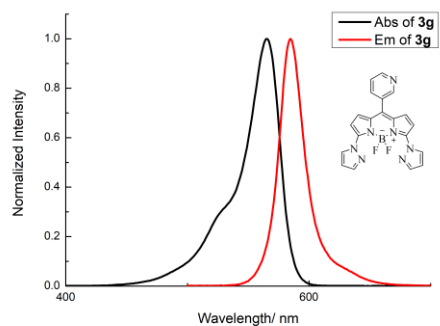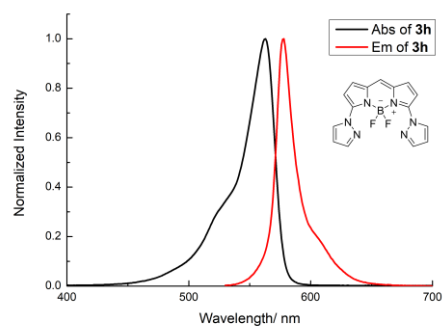

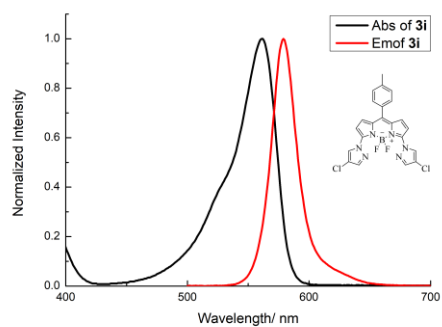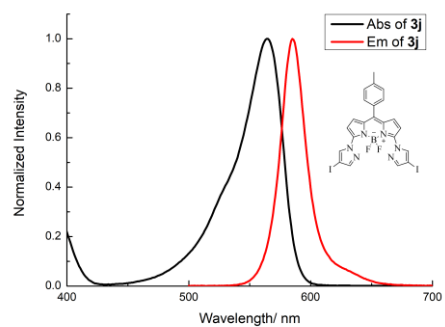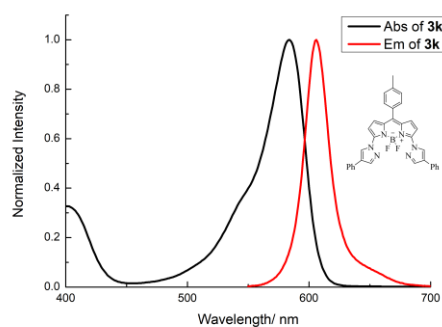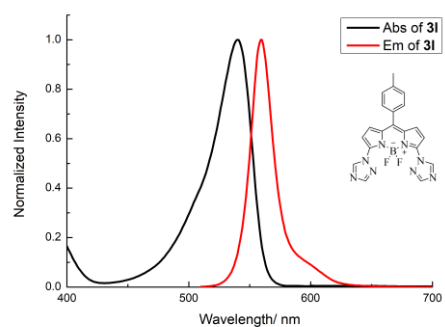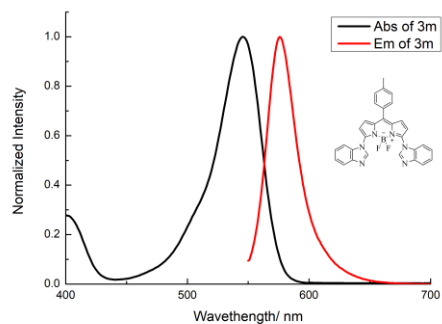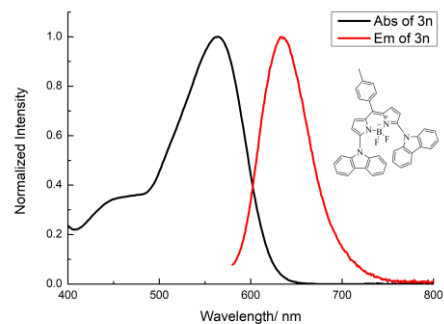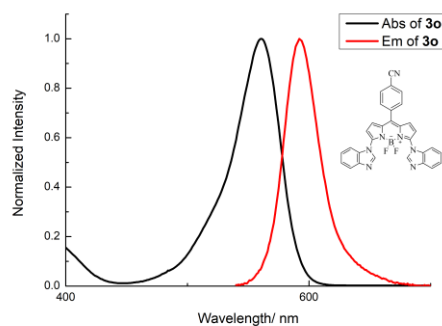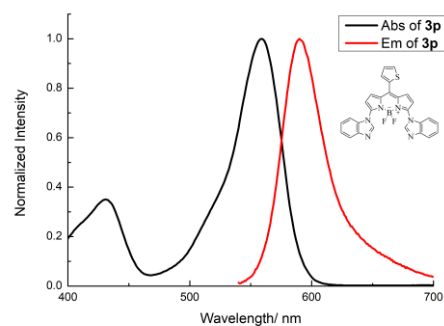

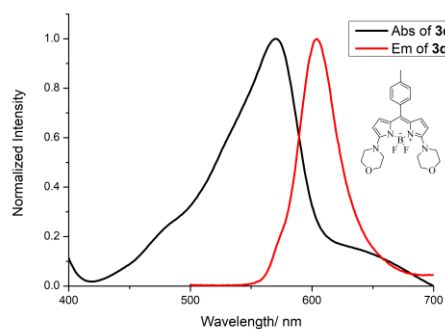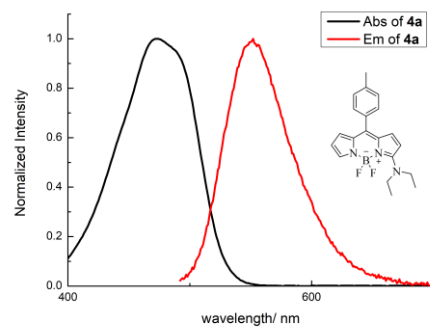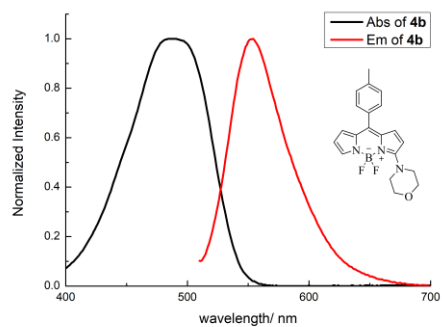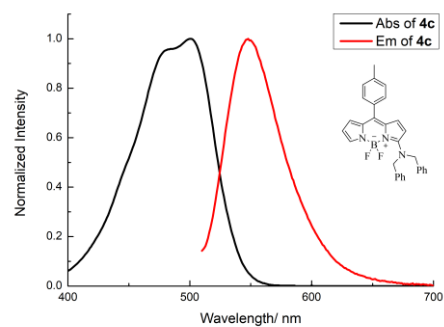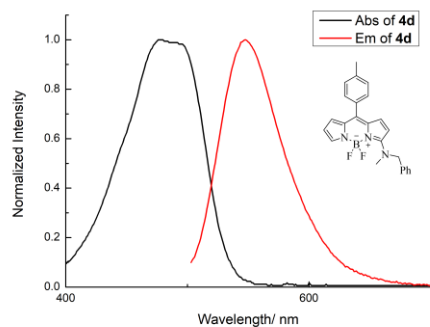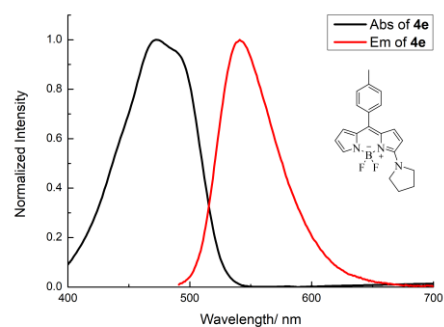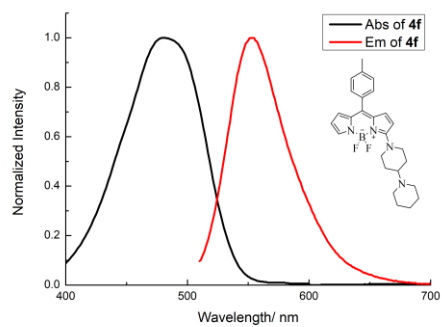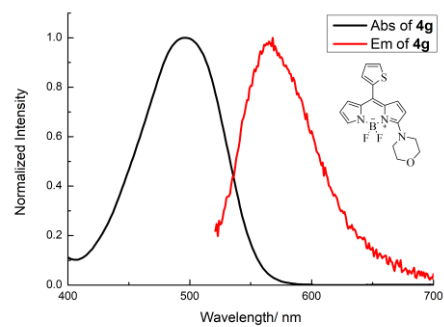

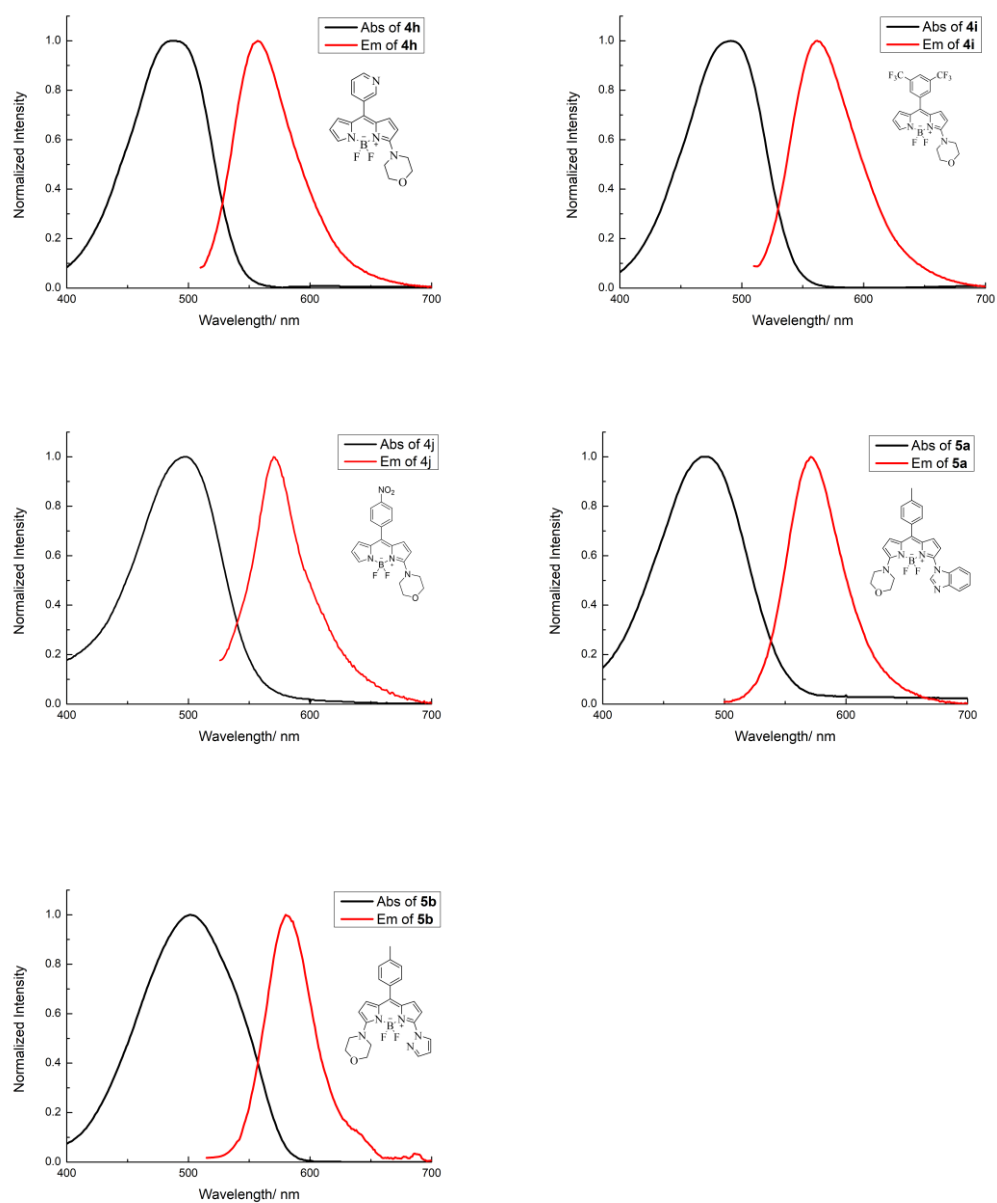

**Fig. S3** Normalized UV-vis-NIR absorption spectra (black lines) and fluorescence emission spectra (red lines) of BODIPYs in  $\text{CH}_2\text{Cl}_2$  ( $1 \times 10^{-5}$  mol/L).

## VI. Cell imaging experiments and cytotoxicity assays

### i) Cell culture

HepG2 cells were hatched in DMEM (Dublecco's modified Eagle's Medium) supplemented with 10% (v/v) FBS (fetal bovine serum), 100 kU/L of penicillin, and 100 mg/L of streptomycin at 37 °C in a humidified atmosphere containing 5% CO<sub>2</sub>.

### ii) Confocal imaging experiments

For Confocal fluorescence images experiments, HepG2 cells were incubated with 2.5  $\mu$ M of **3** or **4** in PBS (phosphate buffered solution) containing 1% DMSO for 15 min at 37 °C. After incubation HepG2 cells were washed twice with PBS. The cells were observed with a Leica TCS SP8 confocal laser scanning microscope.

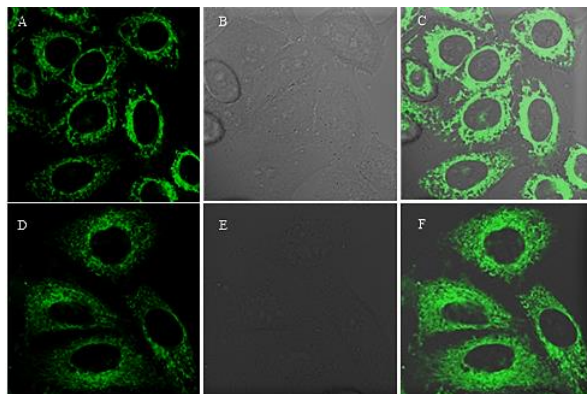

**Fig. S4** (A) Fluorescence images of HepG2 cells stained with **3m**; (B) Bright-field image of HepG2 cells stained with **3m**; (C) Merged image of A and B; (D) Fluorescence images of HepG2 cells stained with **4b**; (E) Bright-field image of HepG2 cells stained with **4b**; (F) Merged image of D and E. HepG2 cells cultured with **3m** (2.5  $\mu$ M,  $\lambda_{\text{ex}}$  = 543 nm,  $\lambda_{\text{em}}$  = 550-650 nm) and **4b** (2.5  $\mu$ M,  $\lambda_{\text{ex}}$  = 488 nm,  $\lambda_{\text{em}}$  = 450-550 nm) in PBS containing 1% DMSO.

For subcellular co-localization experiments, live cells were incubated with 2.5  $\mu$ M of **3m**, **3o**, **3p**, **3q** or **4b** in a PBS containing 1% DMSO for 15 min at 37 °C. After incubated live cells were washed twice with PBS and 1  $\mu$ M ER-Tracker™ Red or ER-Tracker™ Green was added and incubated for an additional 30 min before imaging. The cells were observed with a Leica TCS SP8 confocal laser scanning microscope.

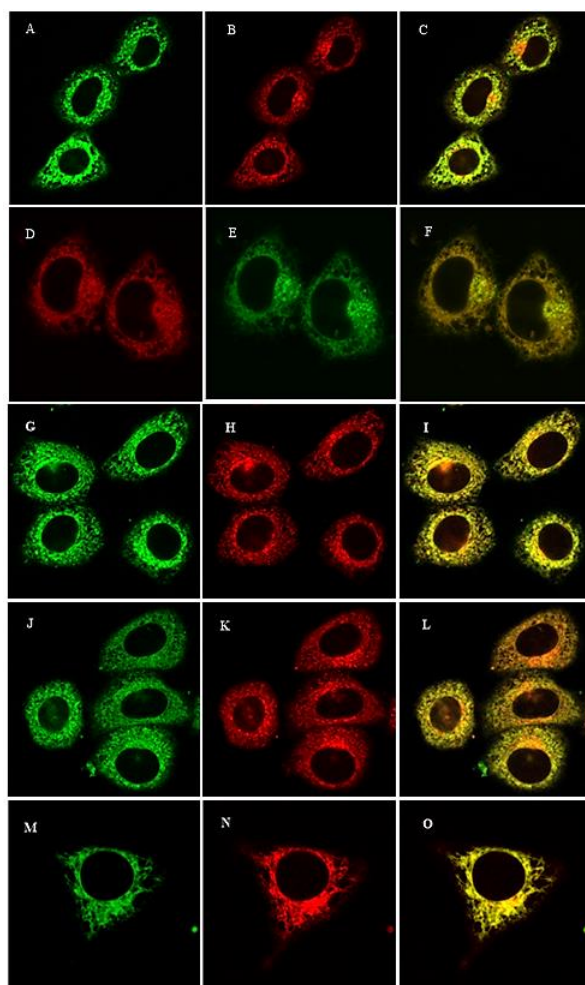

**Fig. S5** Fluorescent images of HepG2 cells: (A) Stained with ER Tracker™ Green ( $\lambda_{\text{ex}} = 488$  nm,  $\lambda_{\text{em}} = 450\text{-}550$  nm); (B) Stained with **3m** ( $\lambda_{\text{ex}} = 543$  nm,  $\lambda_{\text{em}} = 550\text{-}650$  nm); (C) Merged image of A and B; (D) Stained with ER Tracker™ Red ( $\lambda_{\text{ex}} = 543$  nm,  $\lambda_{\text{em}} = 550\text{-}650$  nm); (E) Stained with **4b** ( $\lambda_{\text{ex}} = 488$  nm,  $\lambda_{\text{em}} = 450\text{-}550$  nm); (F) Merged image of D and E. (G) Stained with ER Tracker™ Green ( $\lambda_{\text{ex}} = 488$  nm,  $\lambda_{\text{em}} = 450\text{-}550$  nm); (H) Stained with **3o** ( $\lambda_{\text{ex}} = 543$  nm,  $\lambda_{\text{em}} = 550\text{-}650$  nm); (I) Merged image of G and H; (J) Stained with ER Tracker™ Green ( $\lambda_{\text{ex}} = 488$  nm,  $\lambda_{\text{em}} = 450\text{-}550$  nm); (K) Stained with **3p** ( $\lambda_{\text{ex}} = 543$  nm,  $\lambda_{\text{em}} = 550\text{-}650$  nm); (L) Merged image of J and K. (M) Stained with ER Tracker™ Green ( $\lambda_{\text{ex}} = 488$  nm,  $\lambda_{\text{em}} = 450\text{-}550$  nm); (N) Stained with **3q** ( $\lambda_{\text{ex}} = 543$  nm,  $\lambda_{\text{em}} = 550\text{-}650$  nm); (O) Merged image of M and N.

## ii) Cytotoxicity assays

Cell counting Kit-8 (CCK-8) assays were performed to evaluate the cytotoxicity effect of **3m**, **3o**, **3p**, **3q** and **4b**. HepG2 cells were incubated in a 96-well culture plates at a volume of 100  $\mu\text{L}$  ( $1 \times 10^4$  cells/mL) for a stationary culture. This media were changed into fresh media with a final volume of 200  $\mu\text{L}$  containing sample in the 2-fold down dilution series and then incubated for 24 h. Then 10  $\mu\text{L}$  of CCK-8 solution was added to each well, incubated for an additional 1 h and then absorbance

readings at a wavelength of 490 nm were taken on a spectrophotometer (Molecular Devices, Sunnyvale, USA). The cell viability was calculated by the following formula: (mean optical density(OD) in treated wells/mean OD in control wells)×100%.

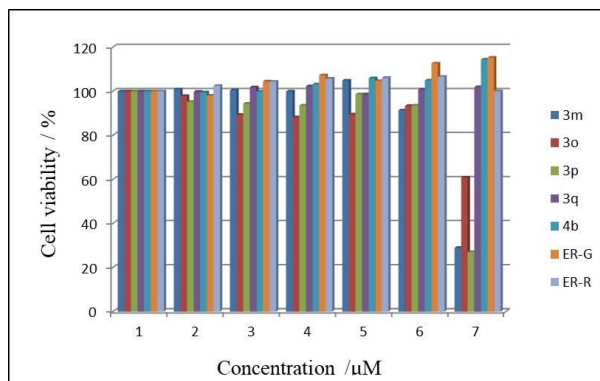

**Fig. S6** Cell viability values (%) estimated by CCK8 assays on HepG2 cells, which were cultured in the presence of 0.25-8  $\mu$ M of **3m**, **3o**, **3p**, **3q**, **4b**, ER Tracker™ Red or ER Tracker™ Green for 24 h at 37 °C.

## VII. References

1. D. Prasannan, D. Raghav, S. Sujatha, H. Hareendrakrishnakumar, K. Rathinasamy and C. Arunkumar, *RSC Adv.*, 2016, **6**, 80808.
2. X. Zhang, F. Xu, P. Guo and X. Qian, *New J. Chem.*, 2012, **36**, 1621.
3. M. Hecht, T. Fischer, P. Dietrich, W. Kraus, A. B. Descalzo, W. E. S. Unger and K. Rurack, *ChemistryOpen*, 2013, **2**, 25.
4. J. Songkhao, R. Banerjee, S. Debnath, S. Narasimhan, N. Wannaprom, P. Vanalabhpatana, N. Seriani, R. Gebauer and P. Thamyongkit, *Dyes and Pigments*, 2017, **142**, 558.
5. B. R. Groves, S. M. Crawford, T. Lundrigan, C. F. Matta, S. Sowlati and A. Thompson, *Chem. Commun.*, 2013, **49**, 816.

# VIII. Copies of $^1\text{H}$ and $^{13}\text{C}$ NMR spectra

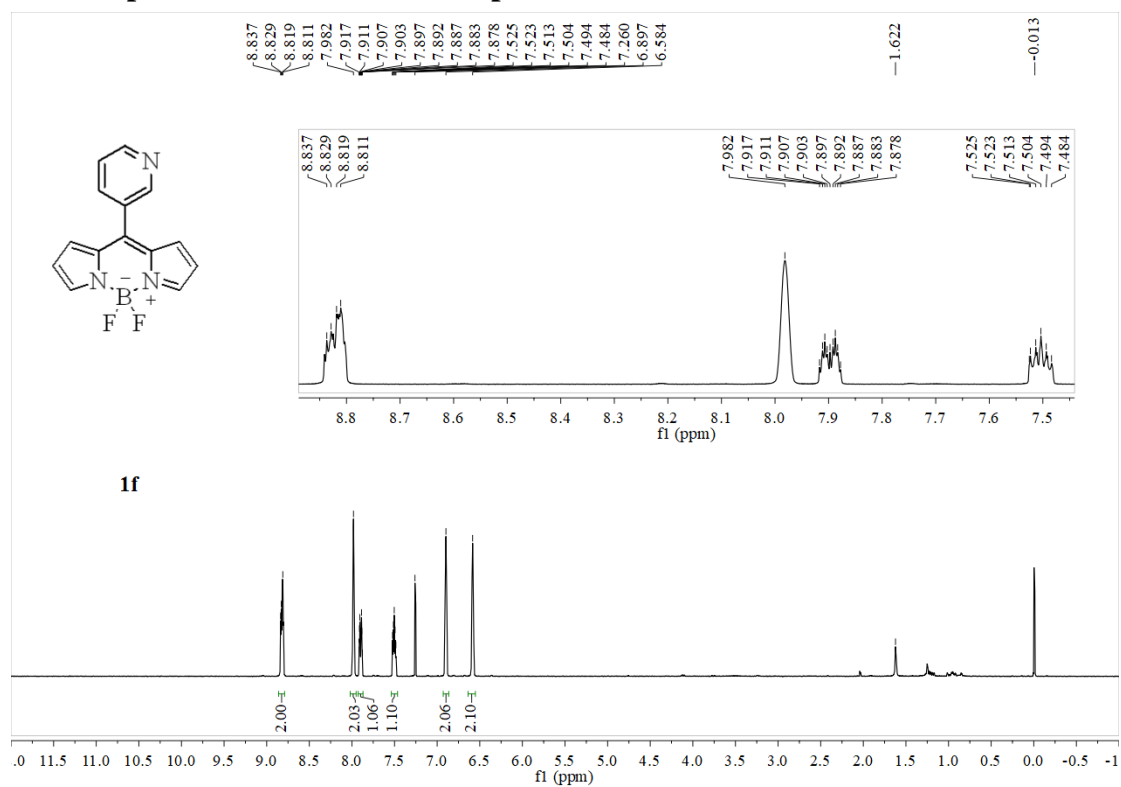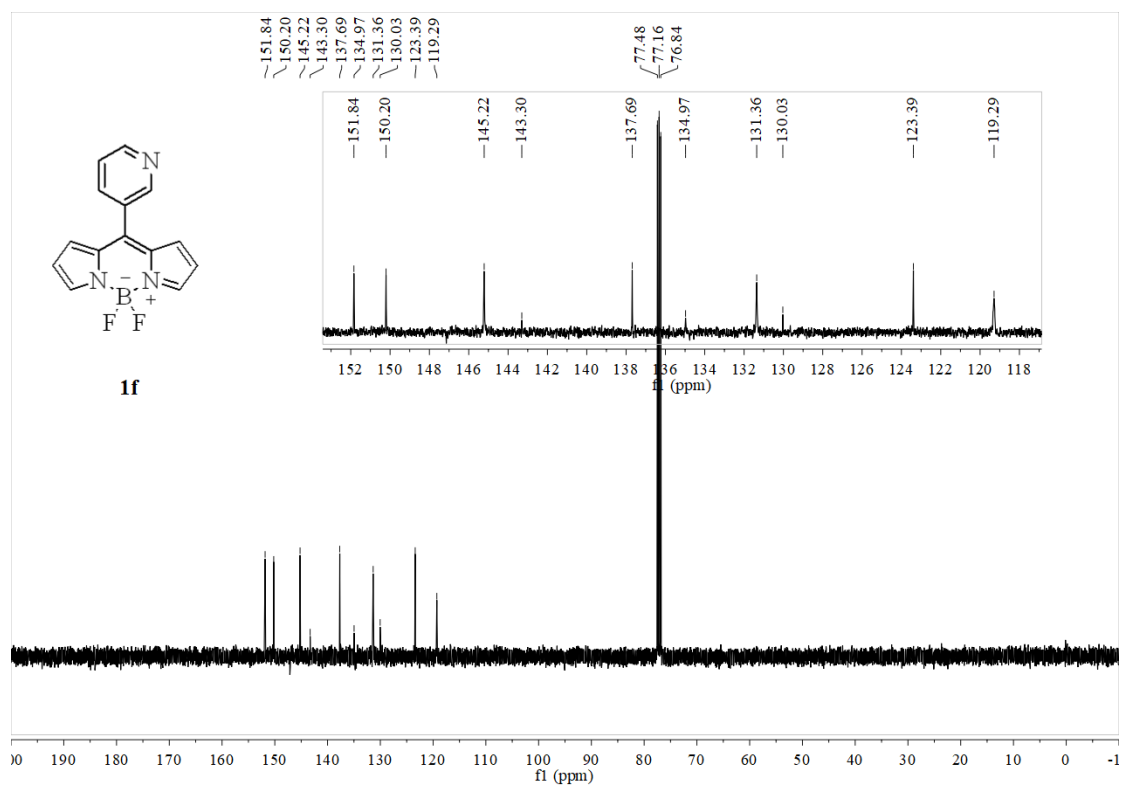

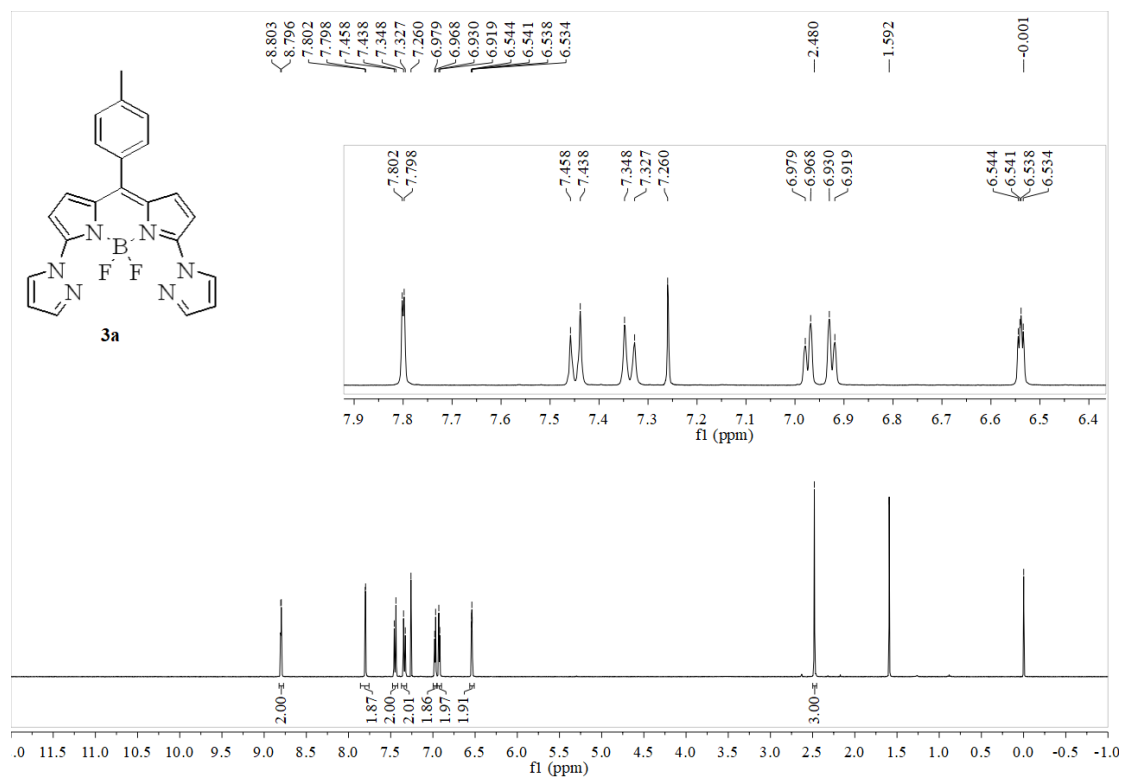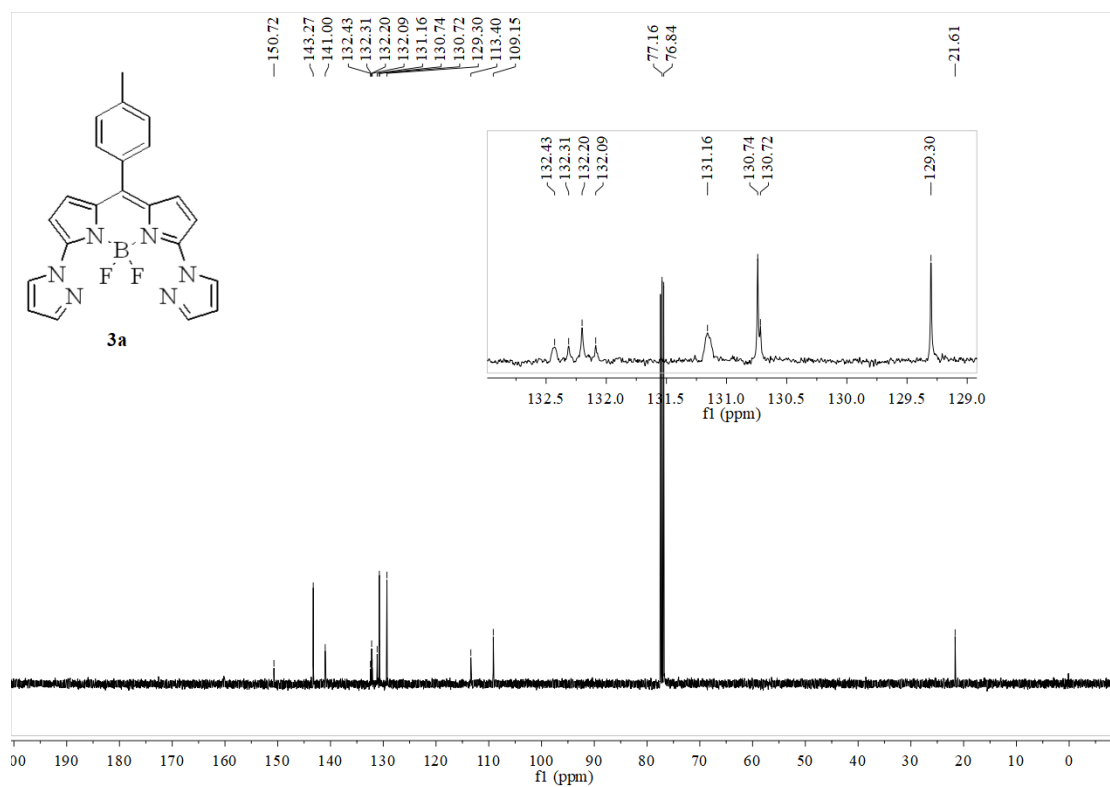

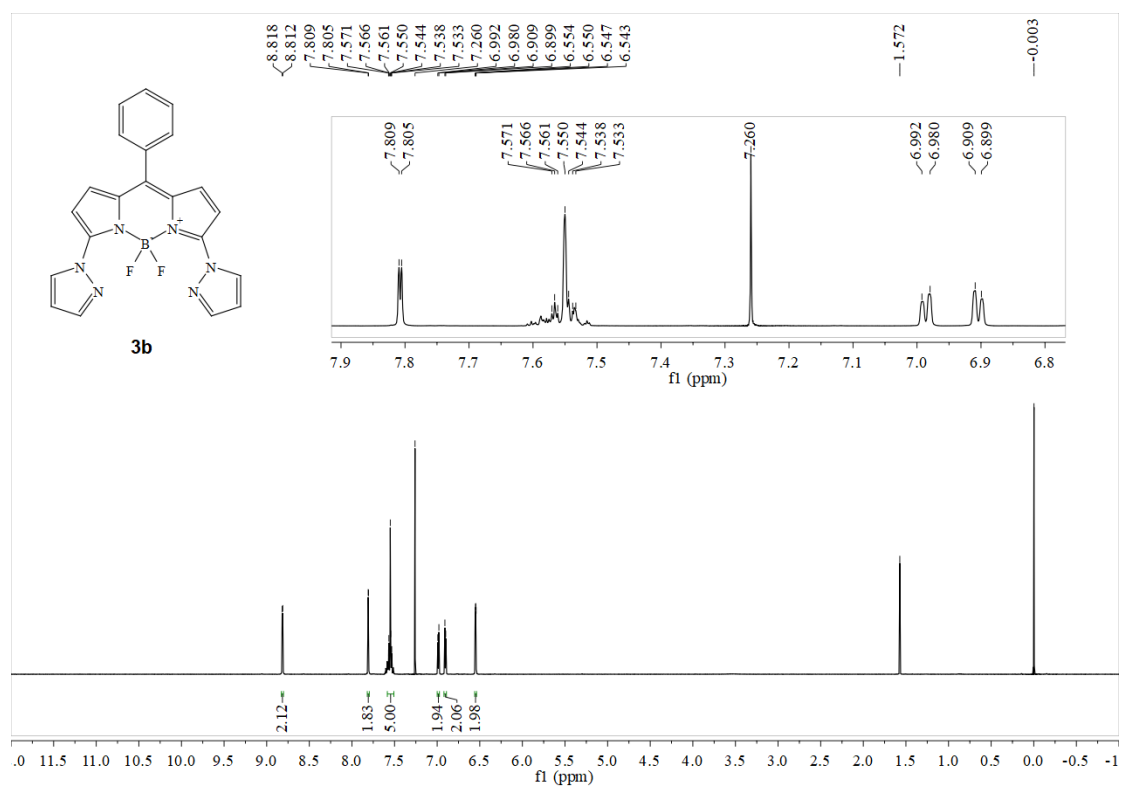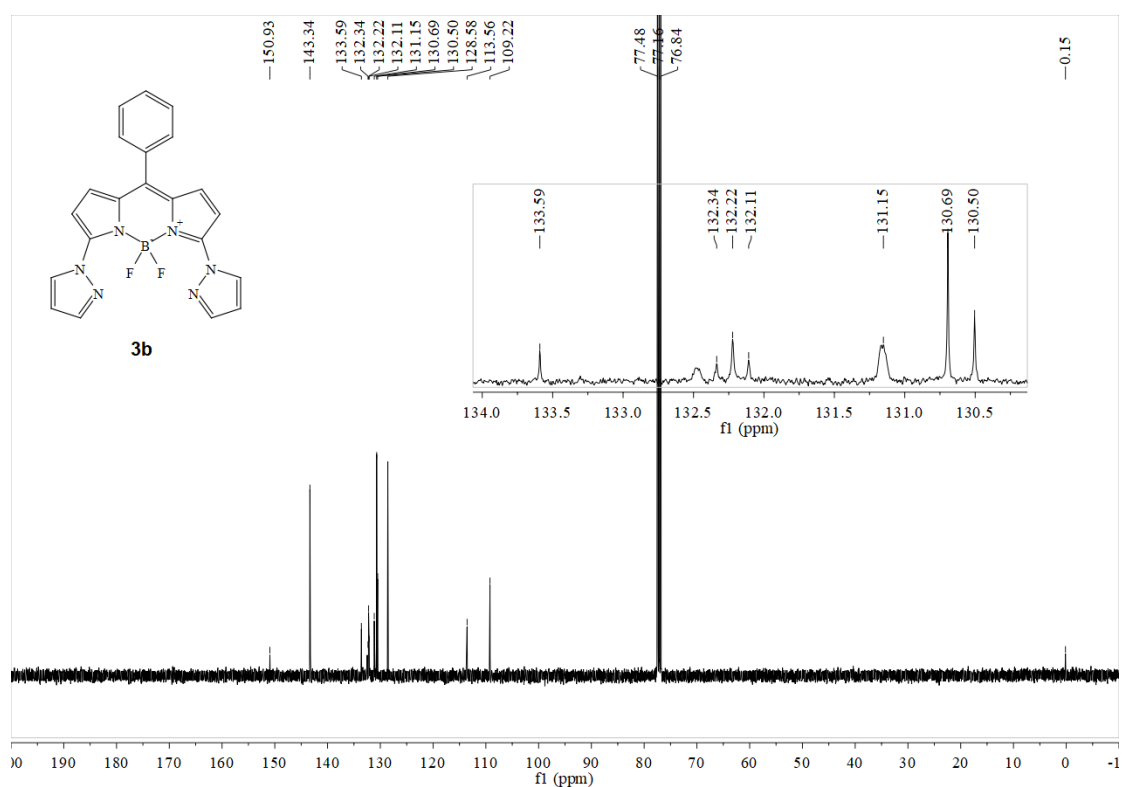

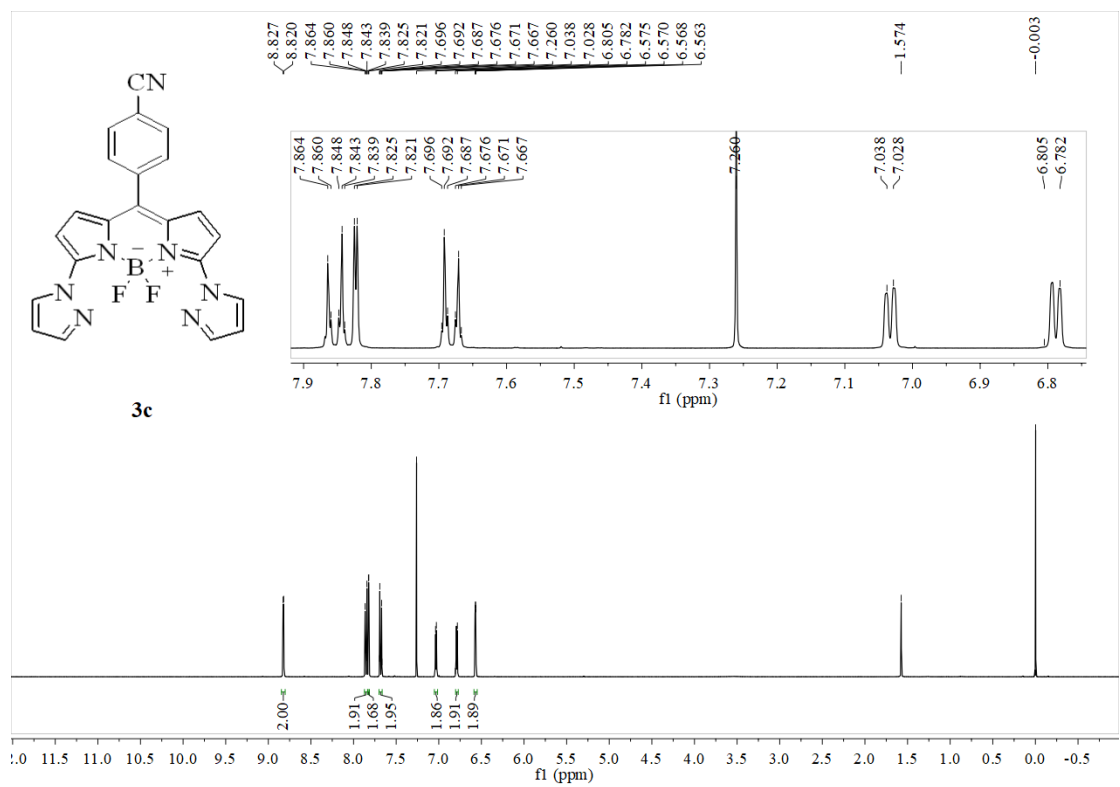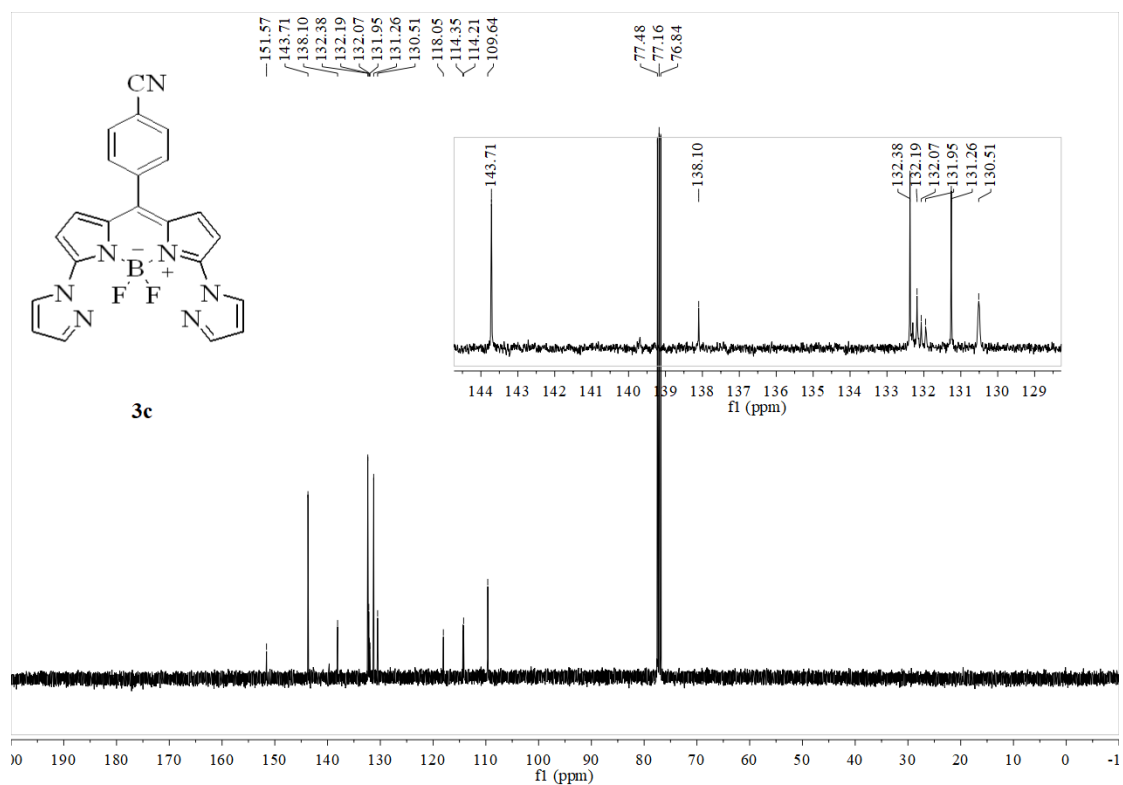

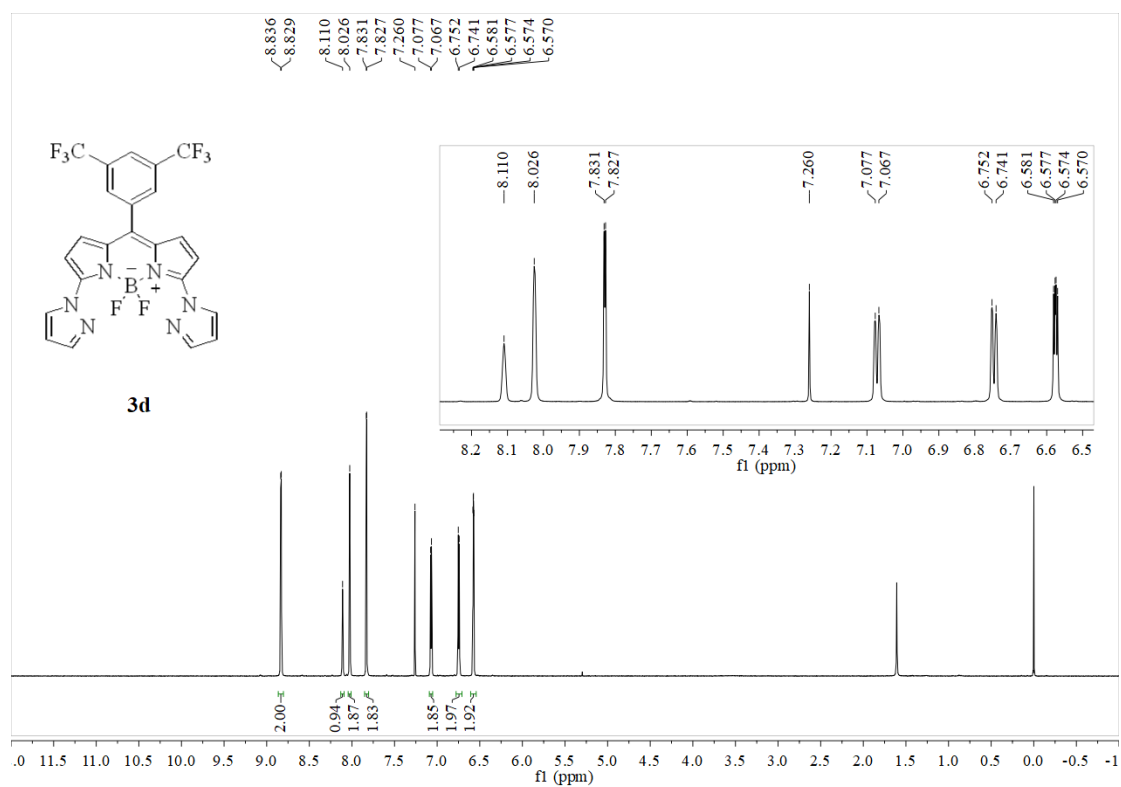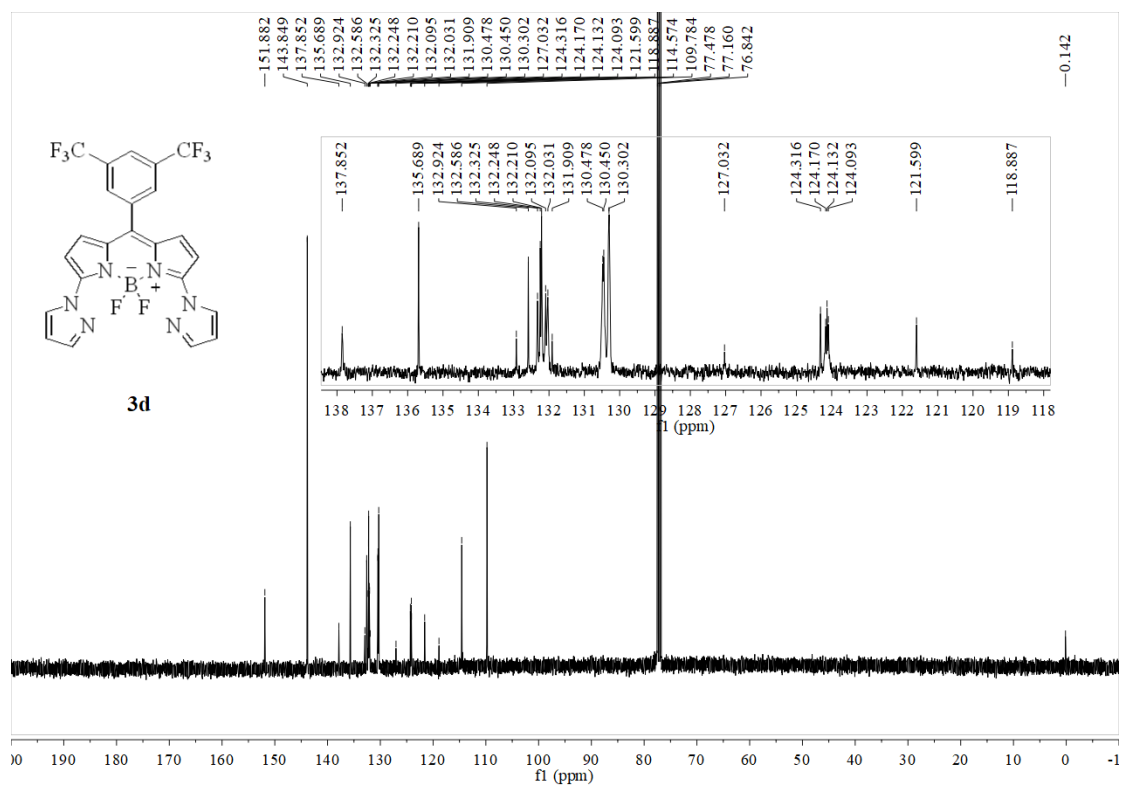

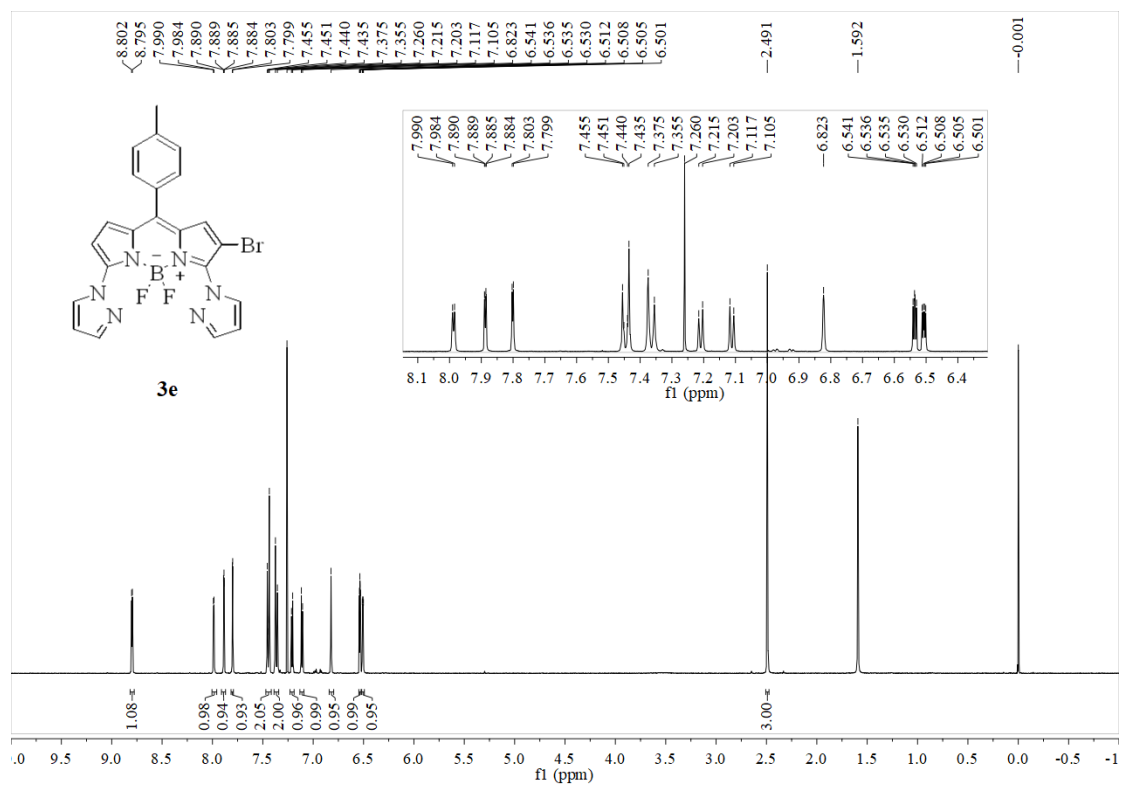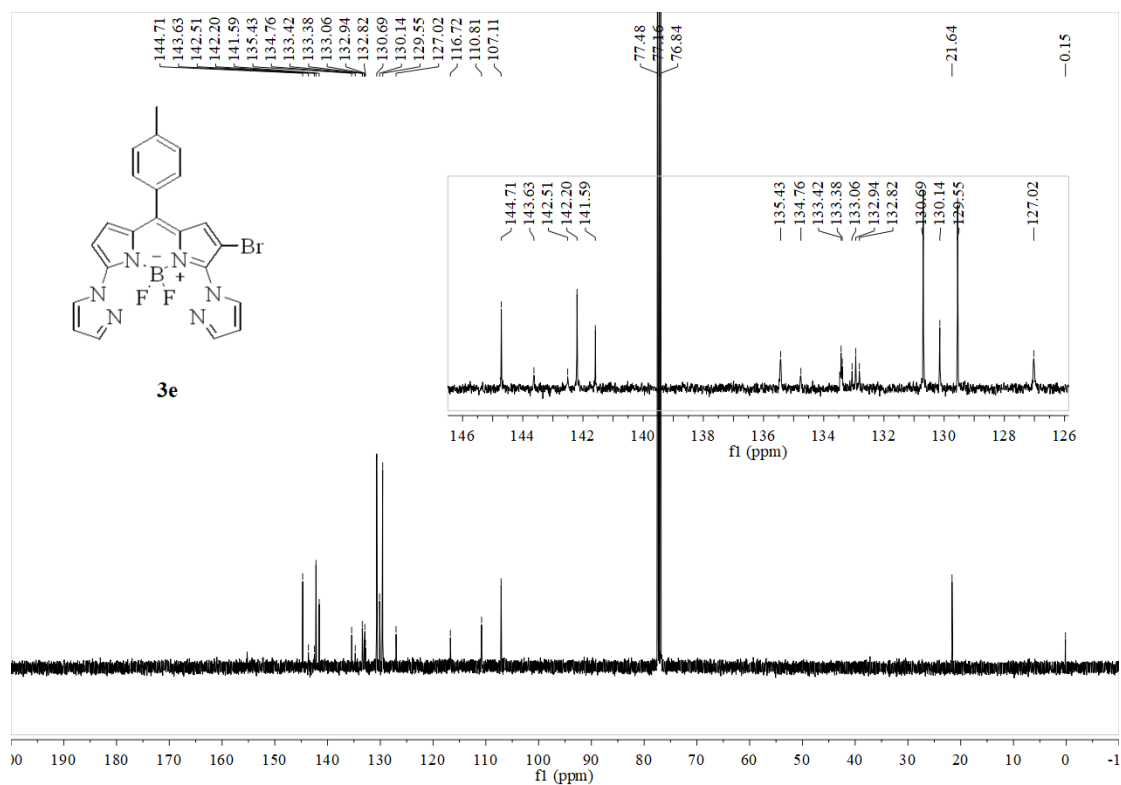

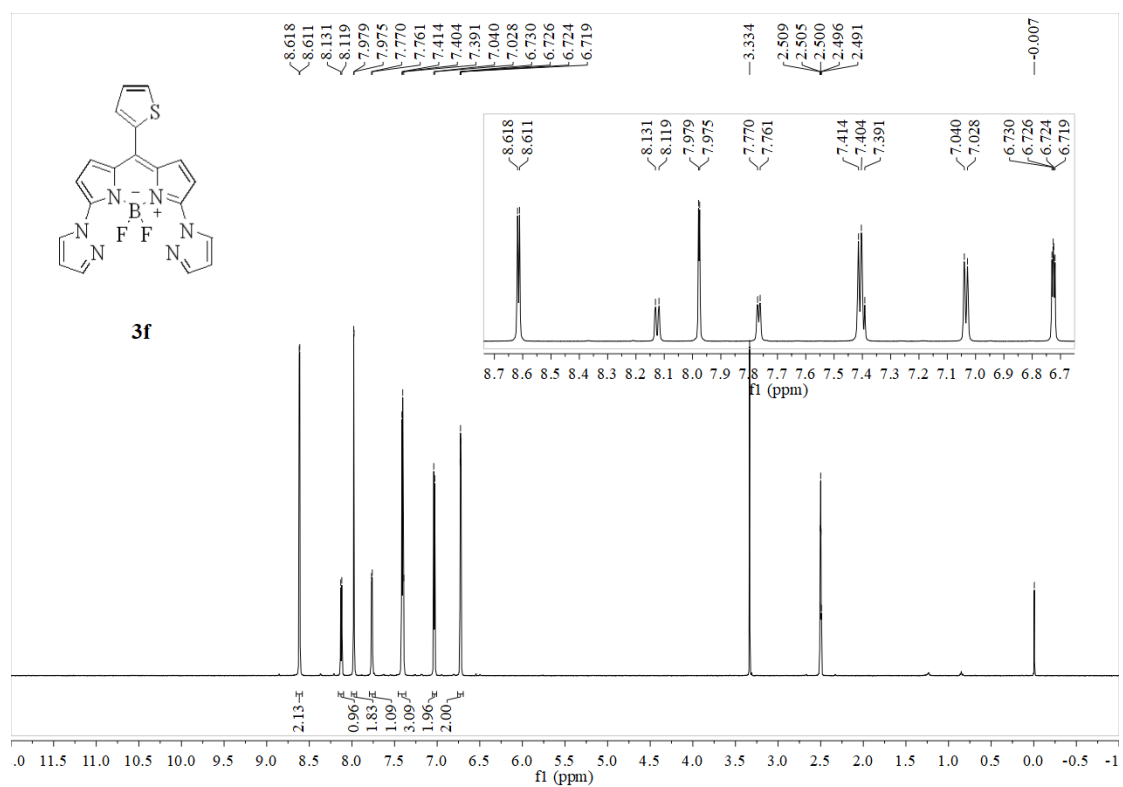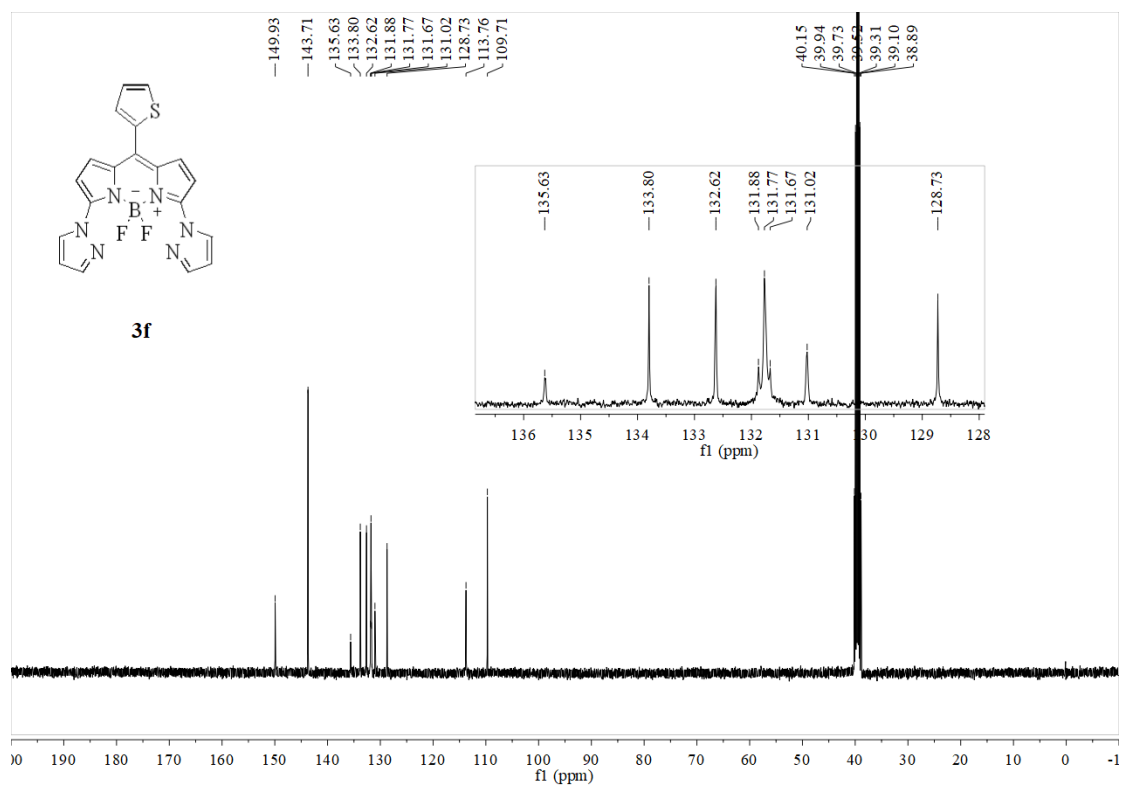

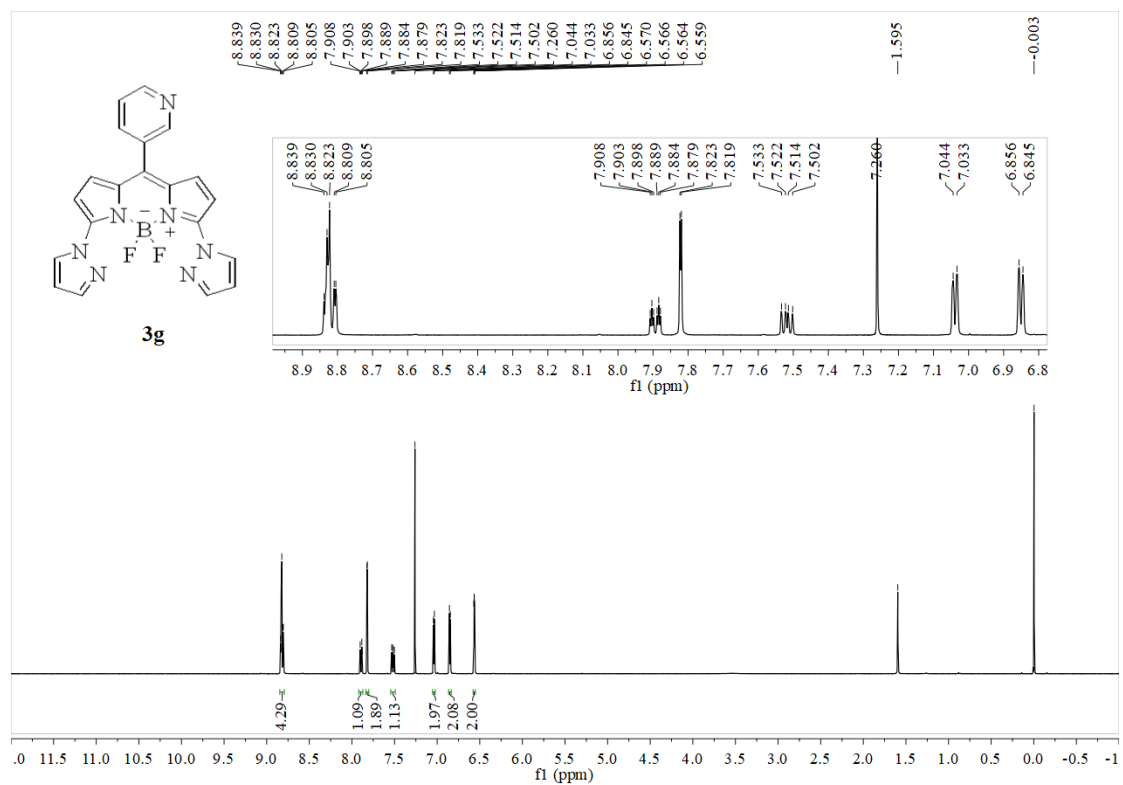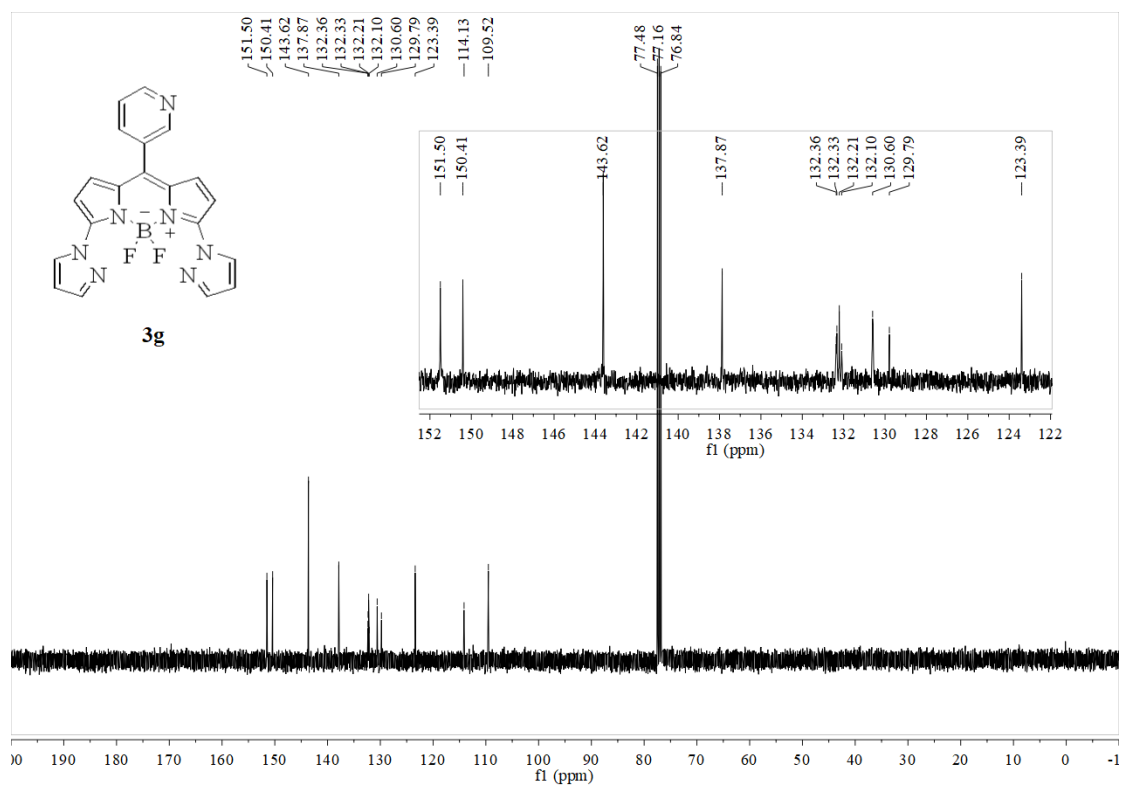

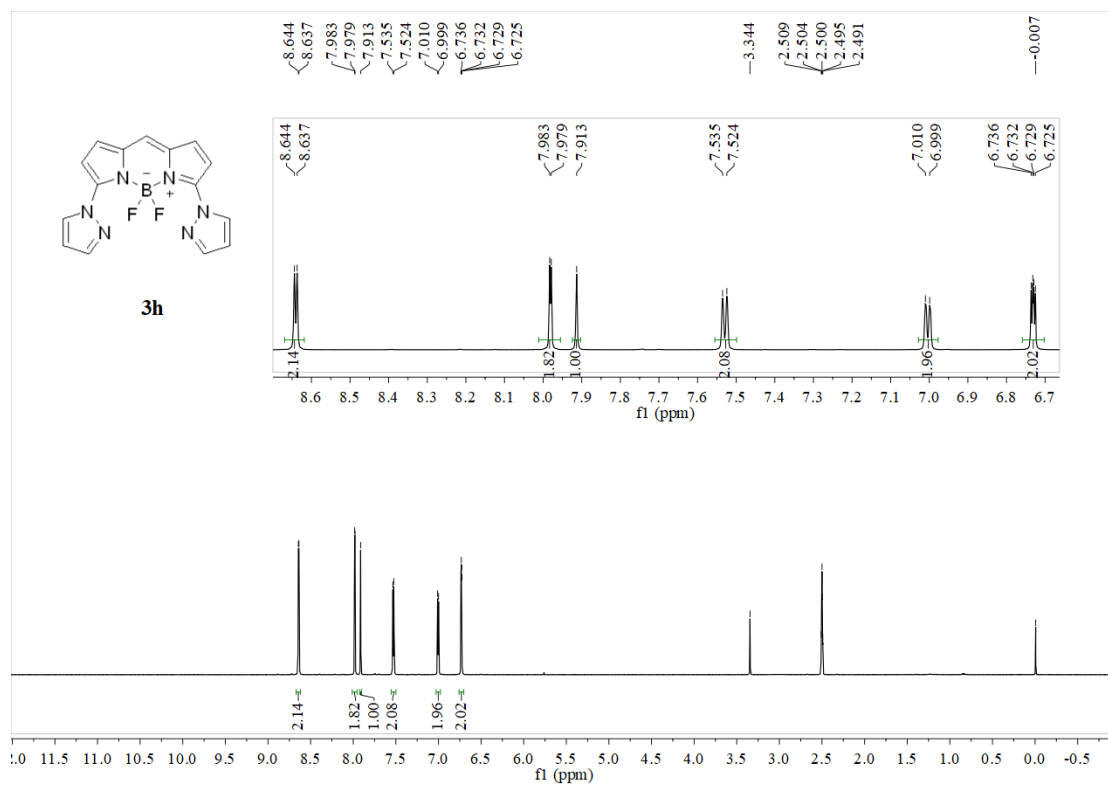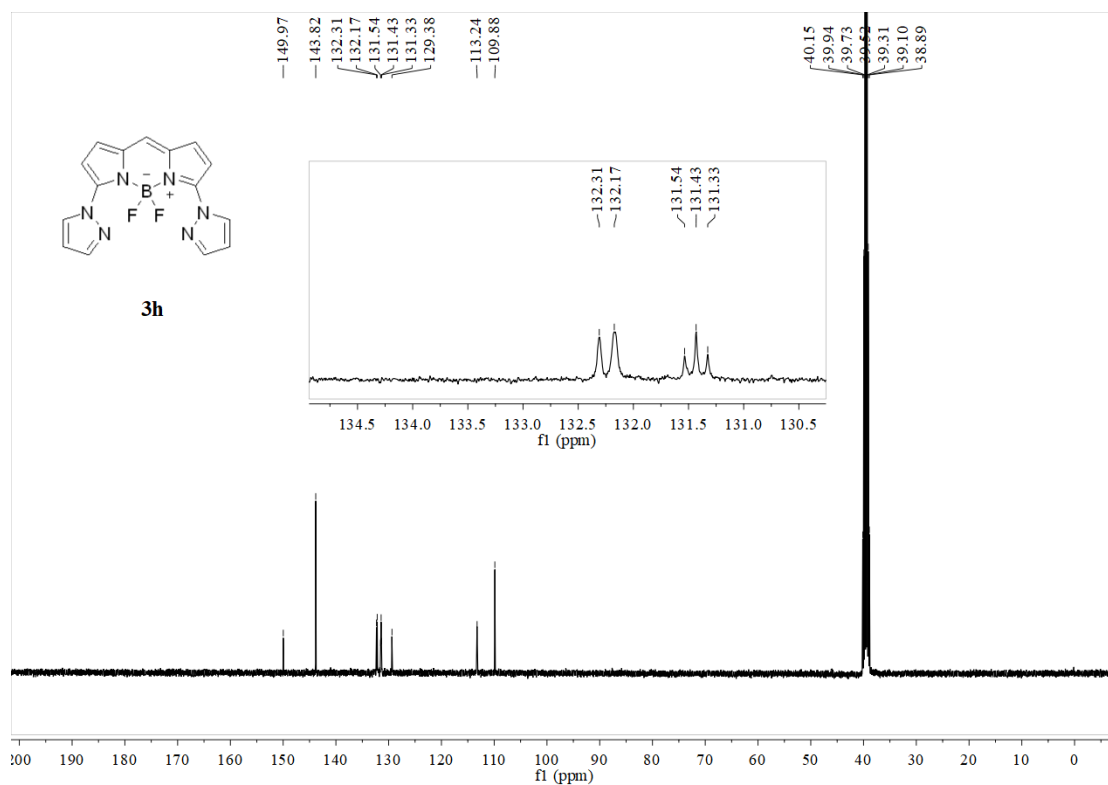

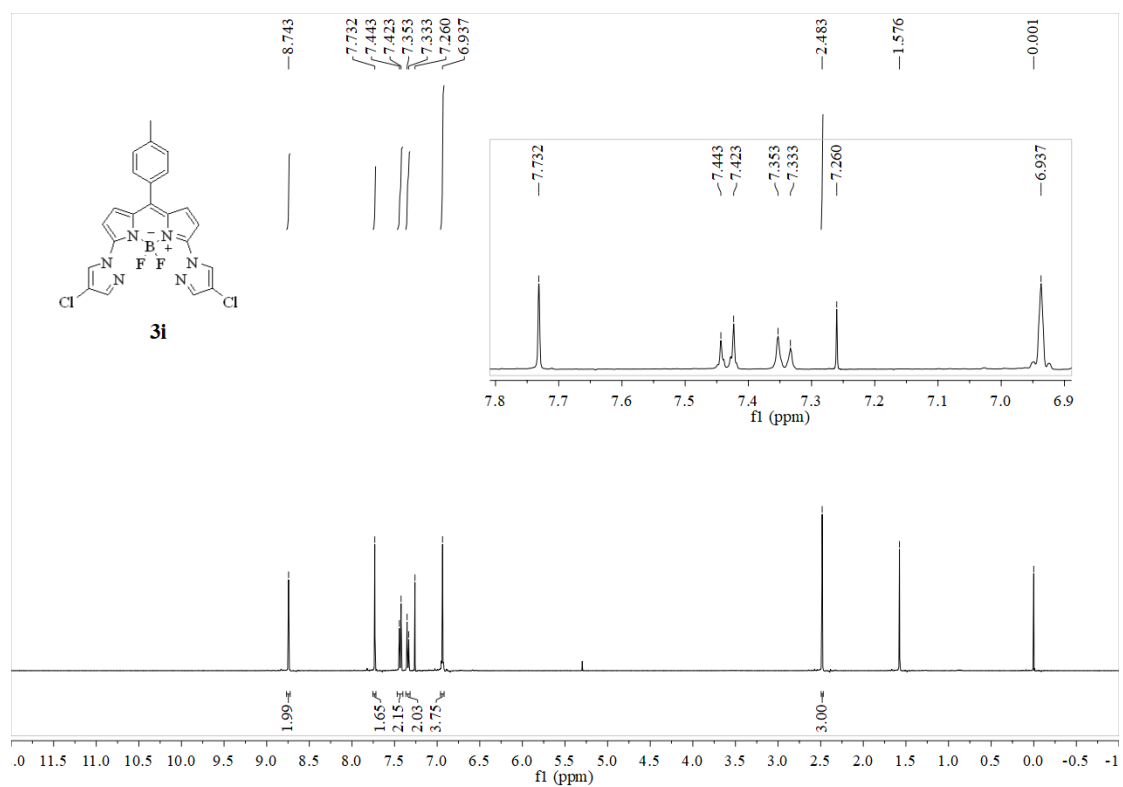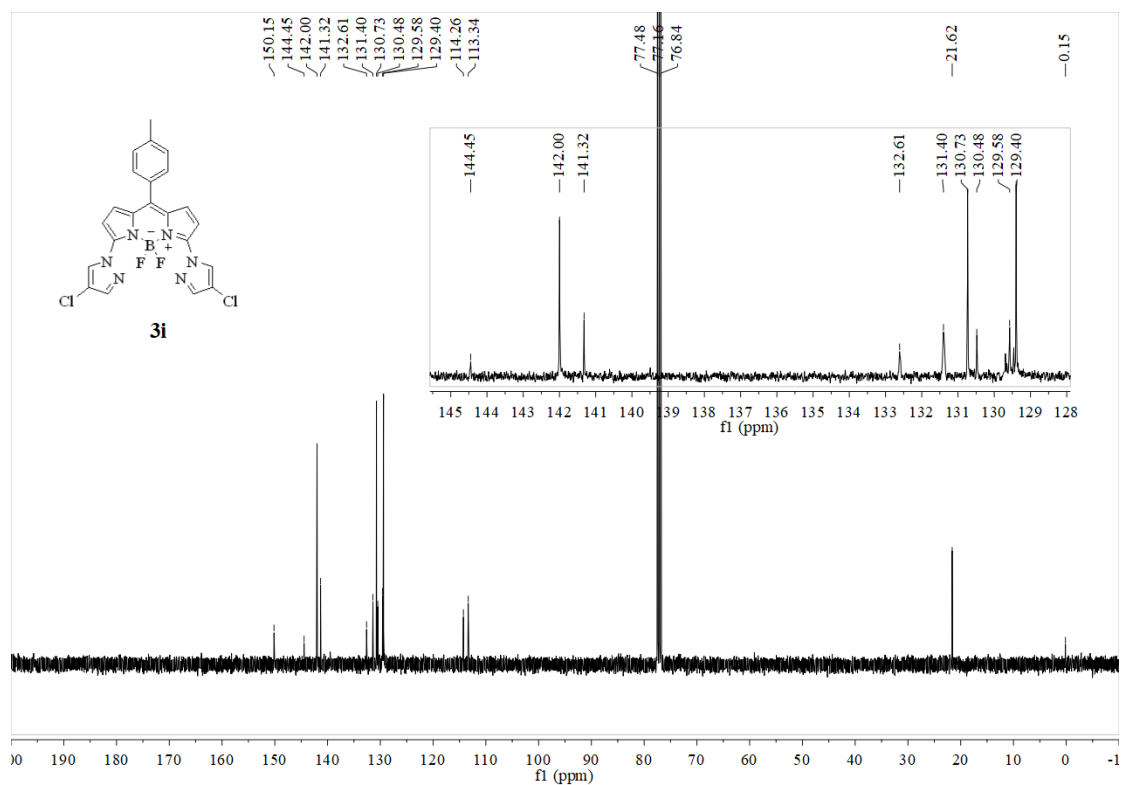

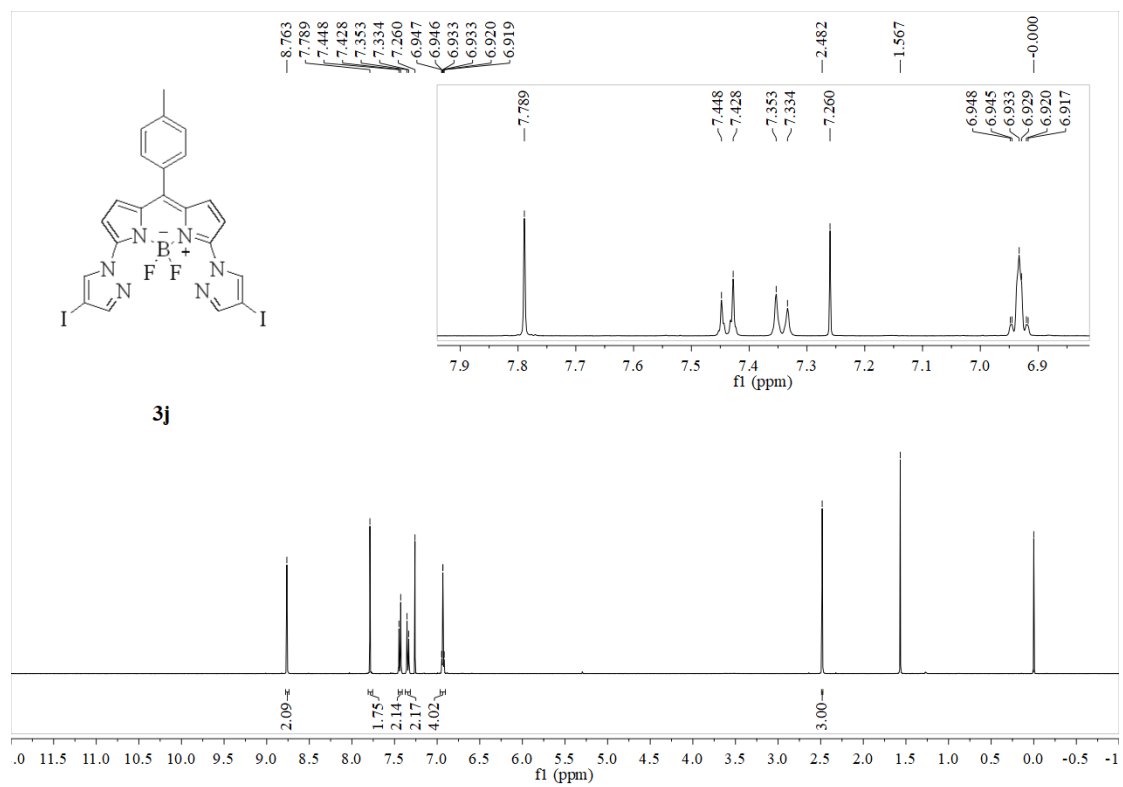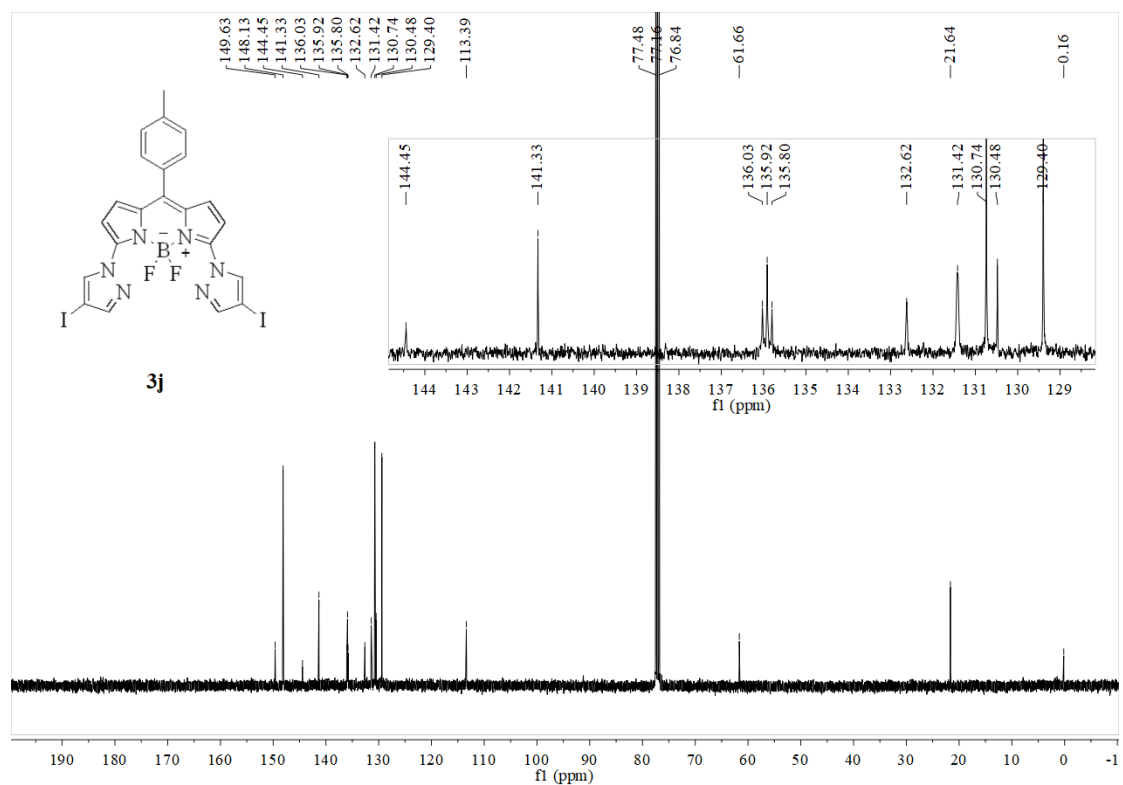

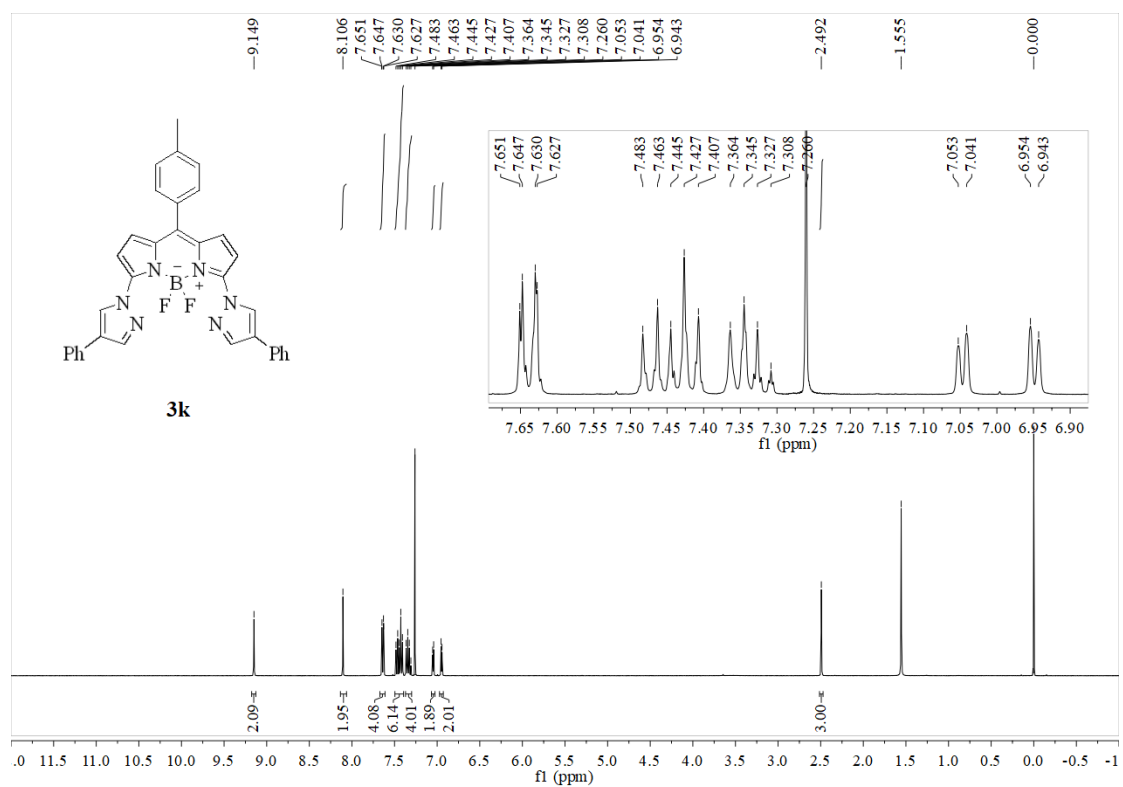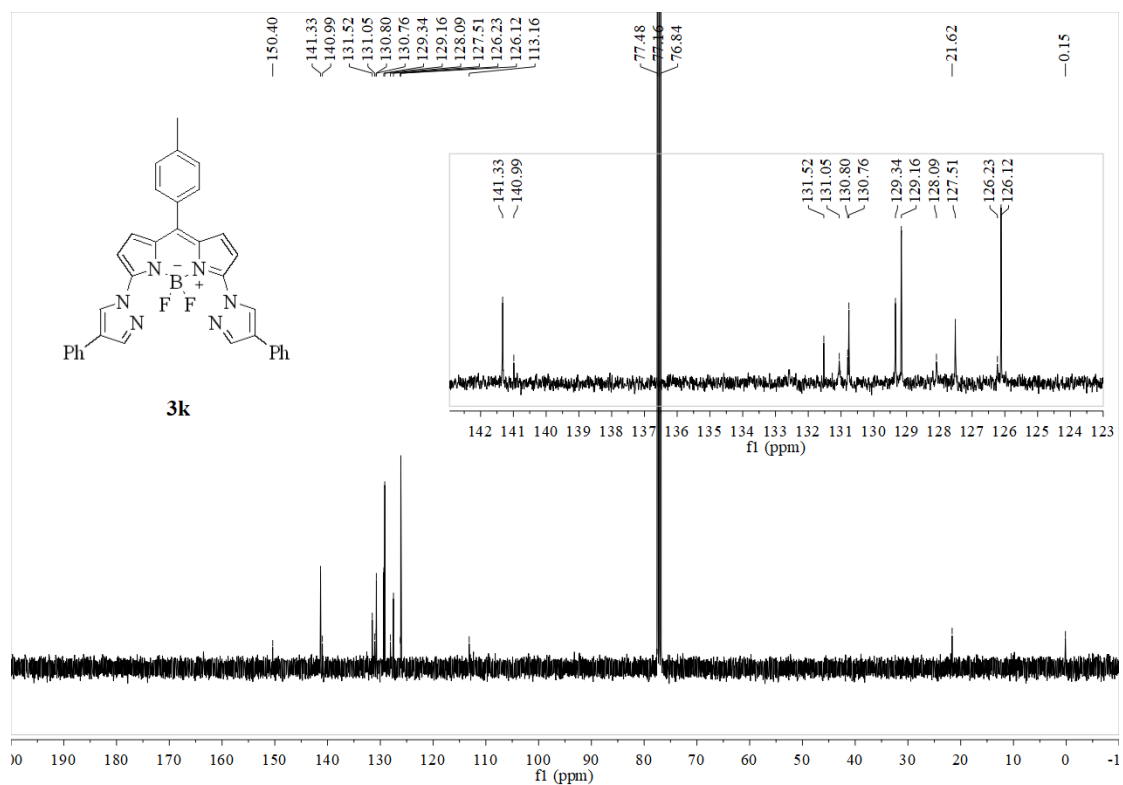

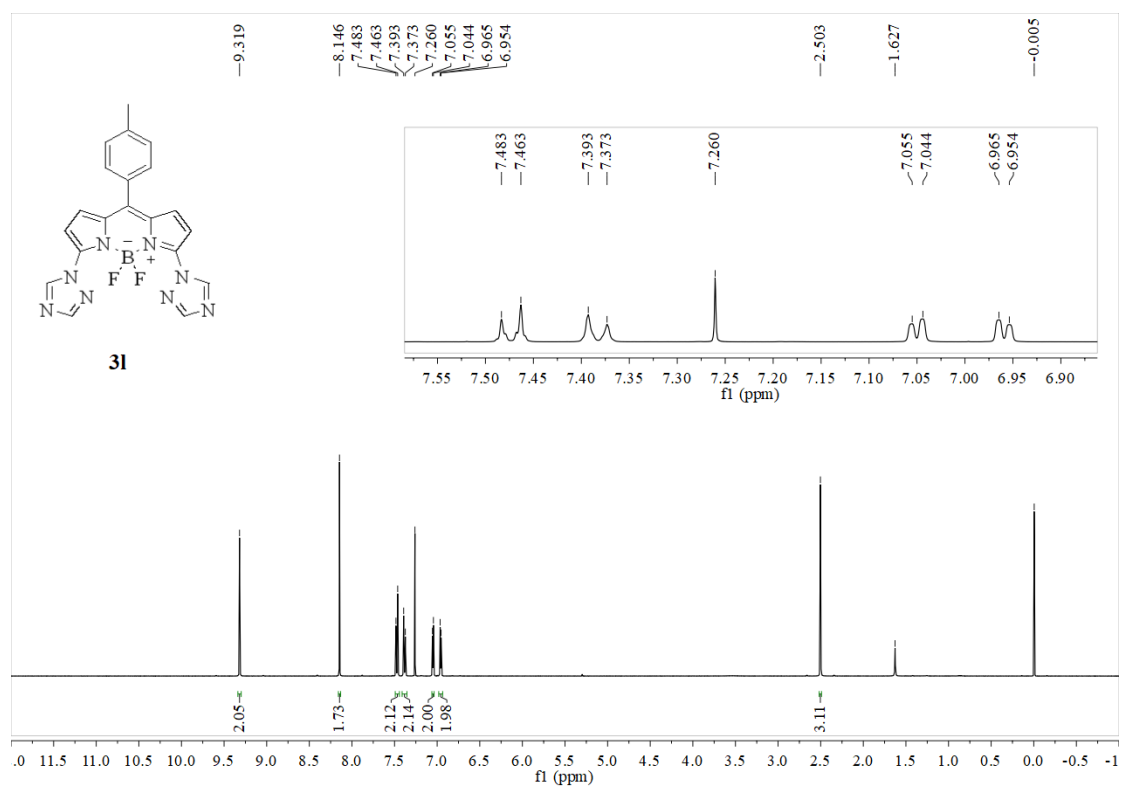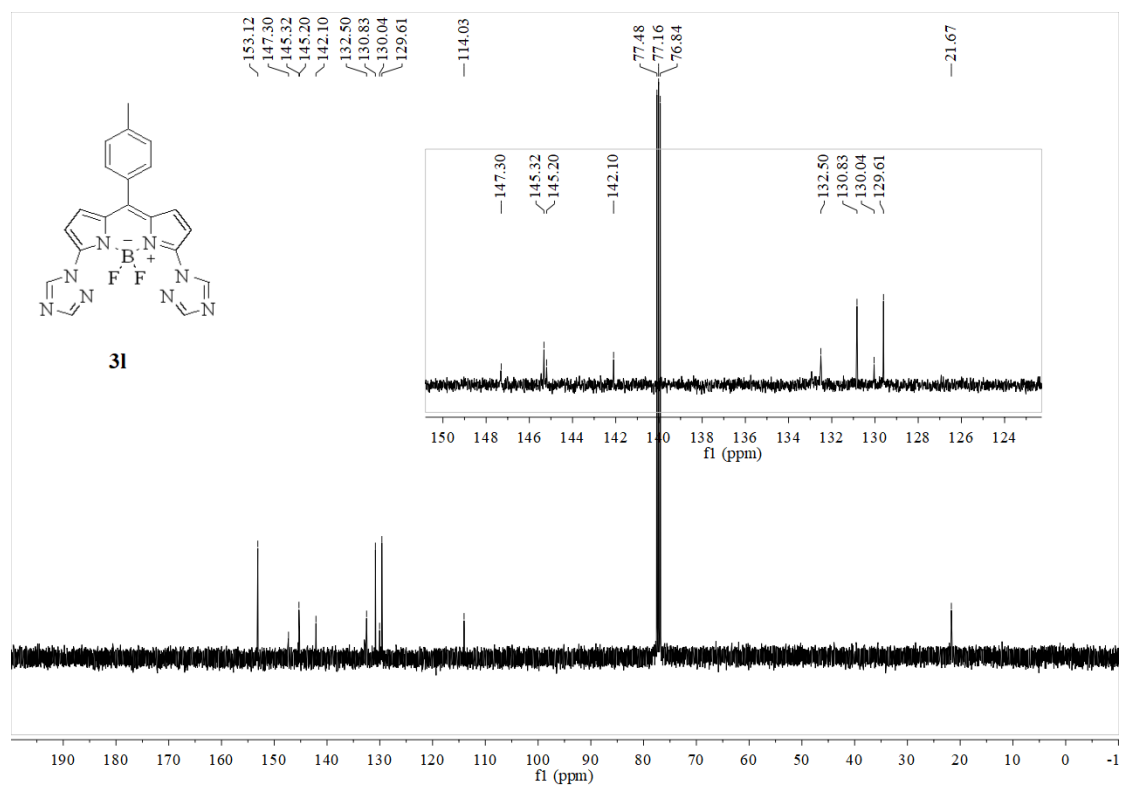

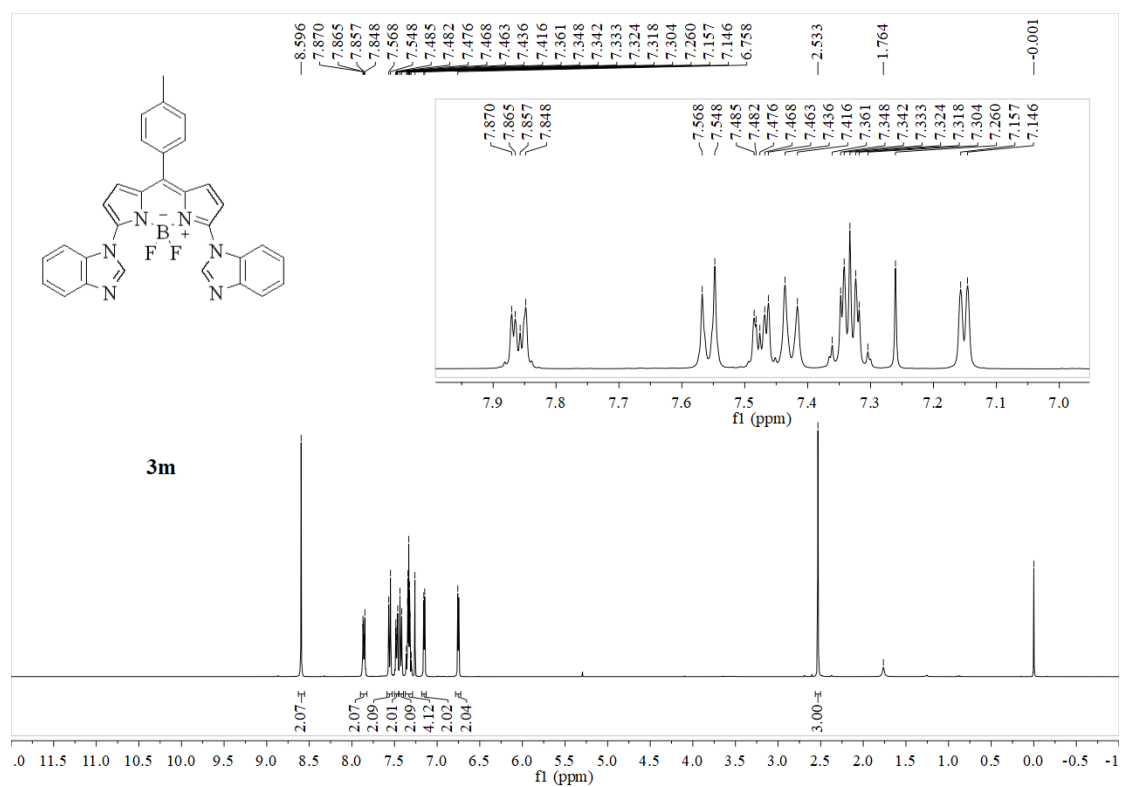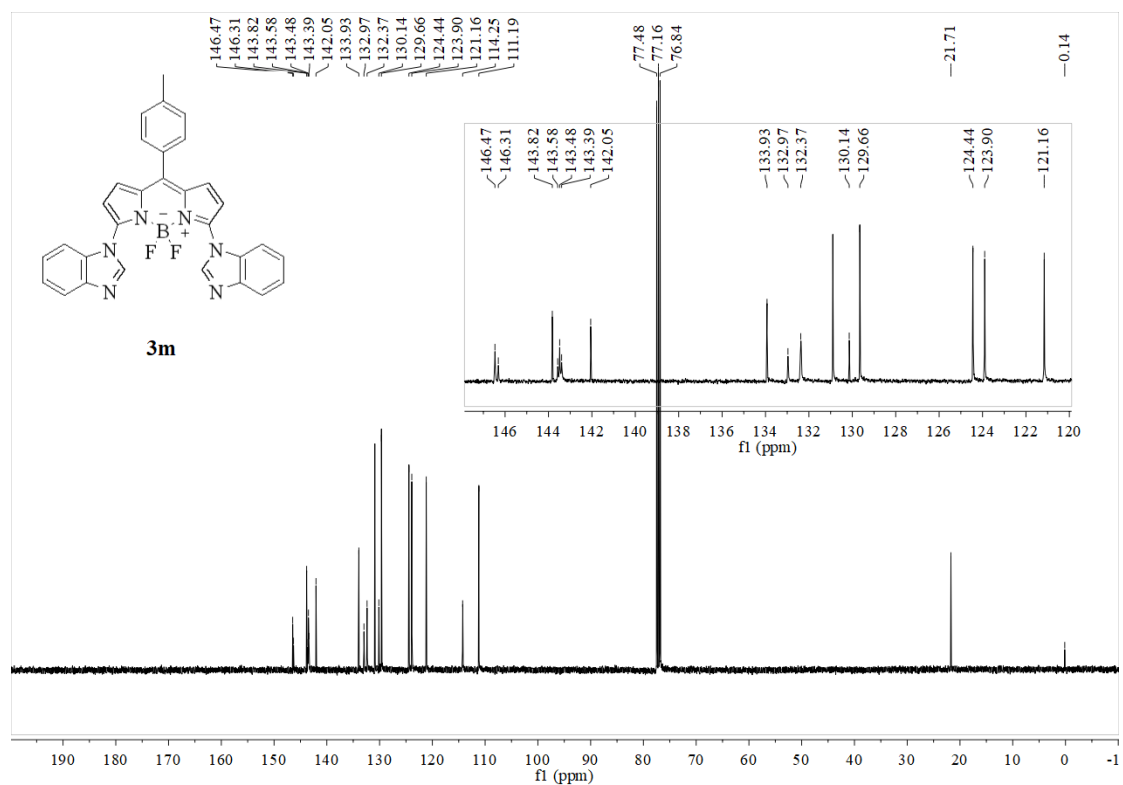

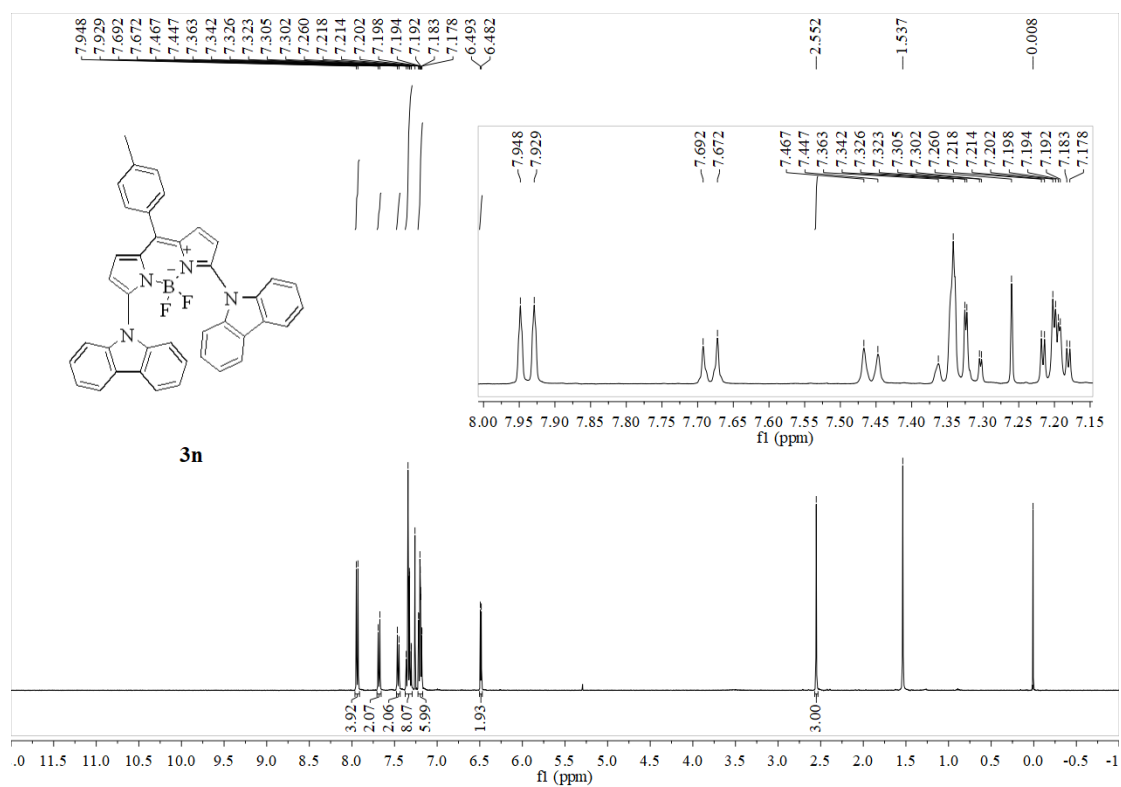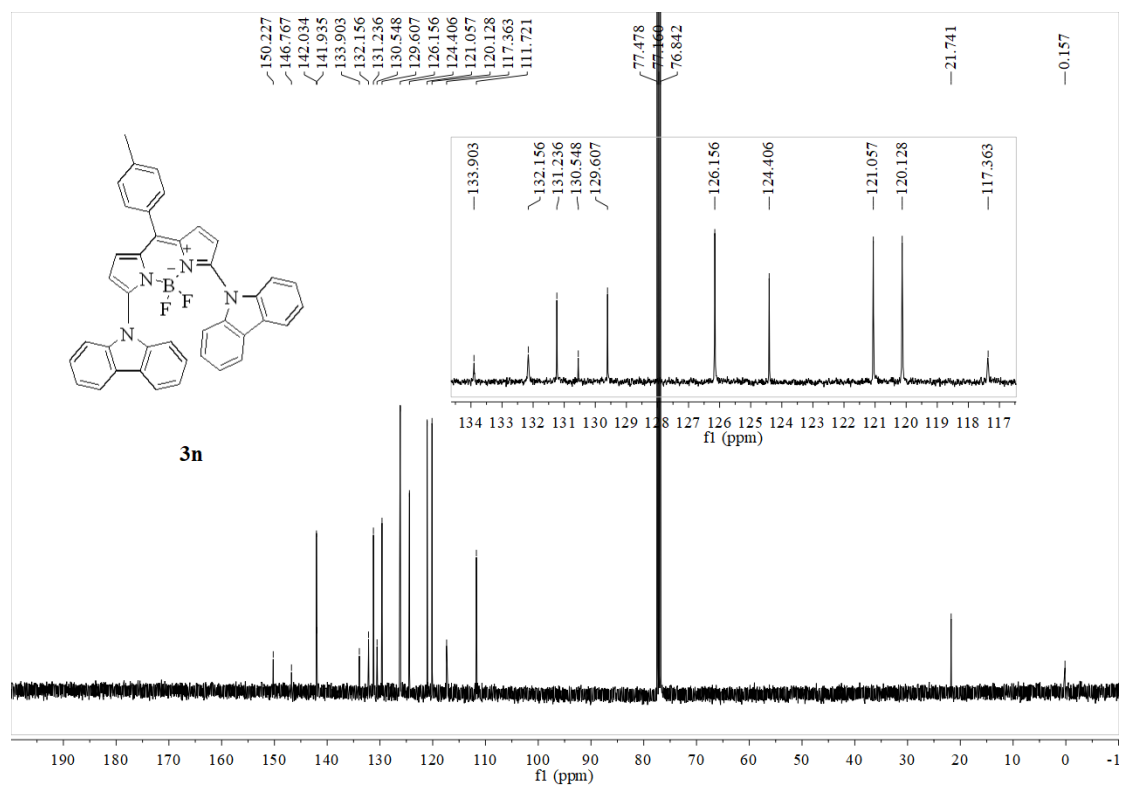

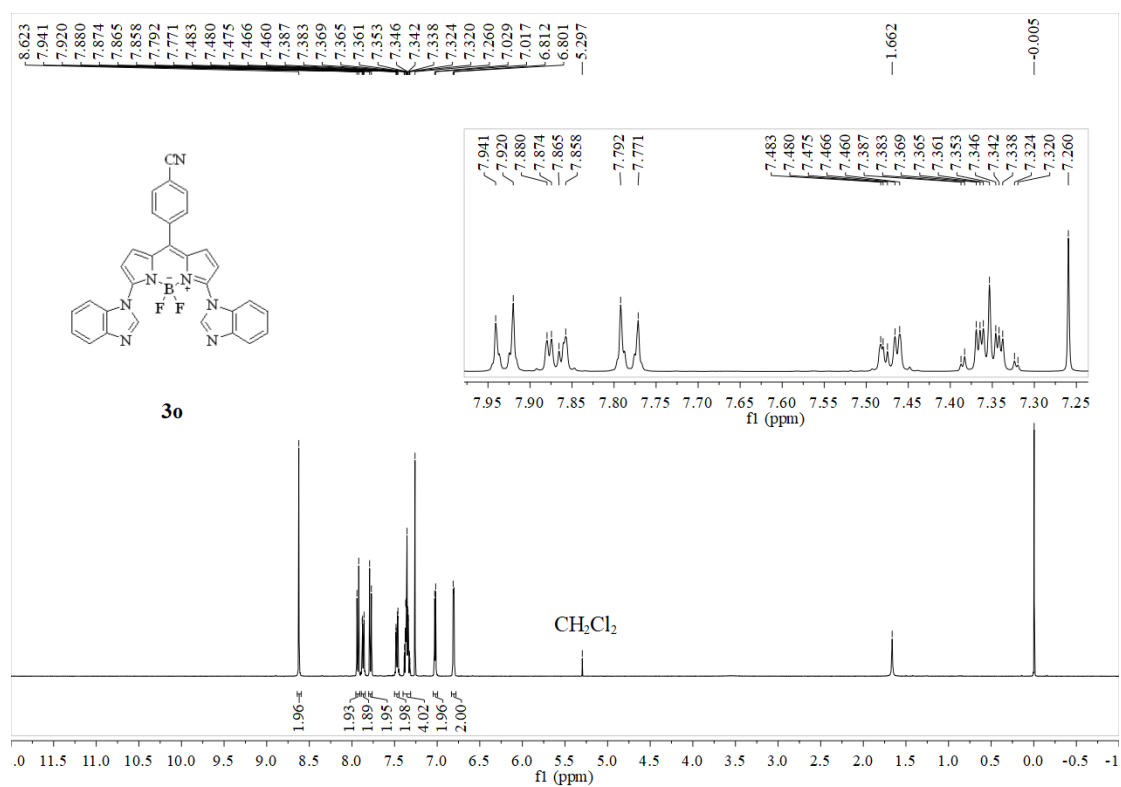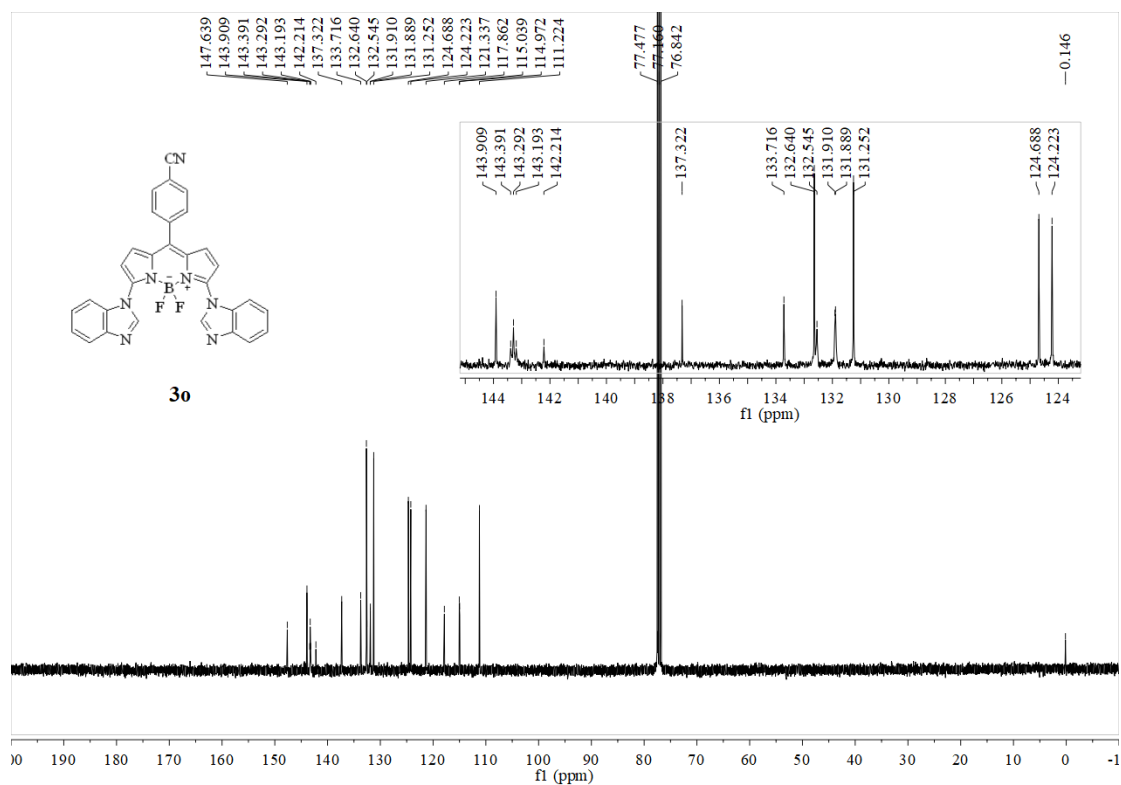

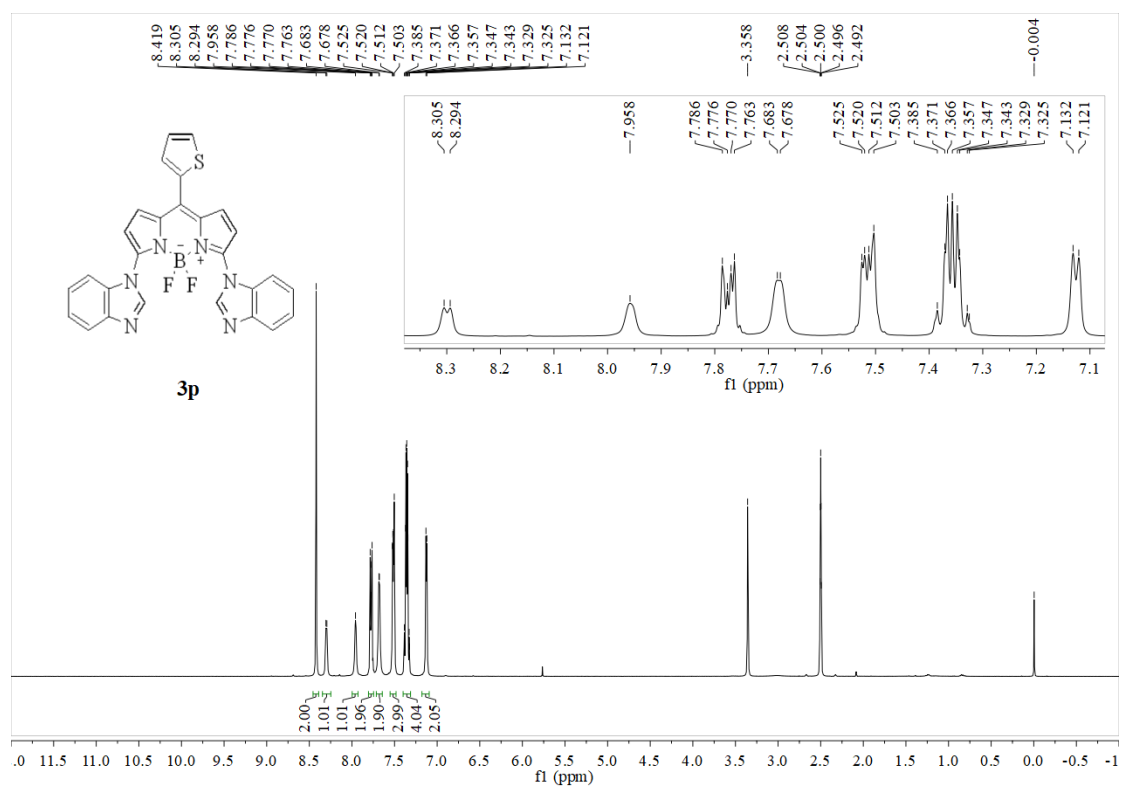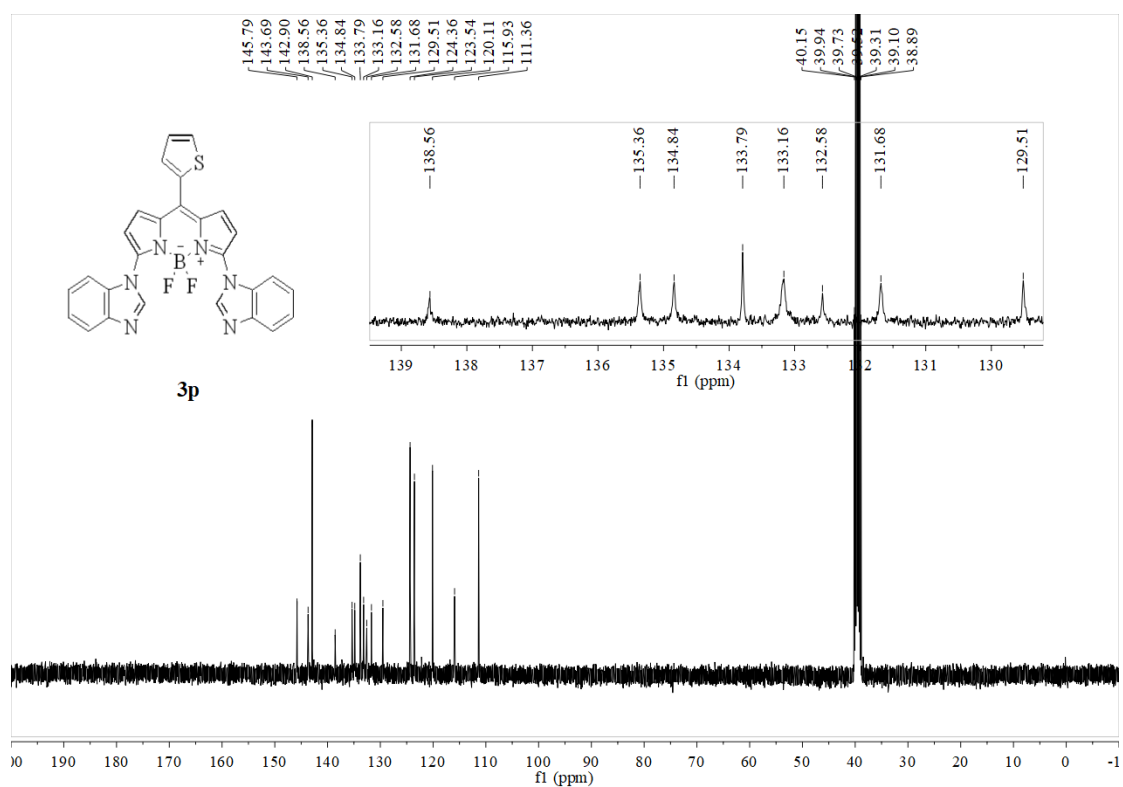

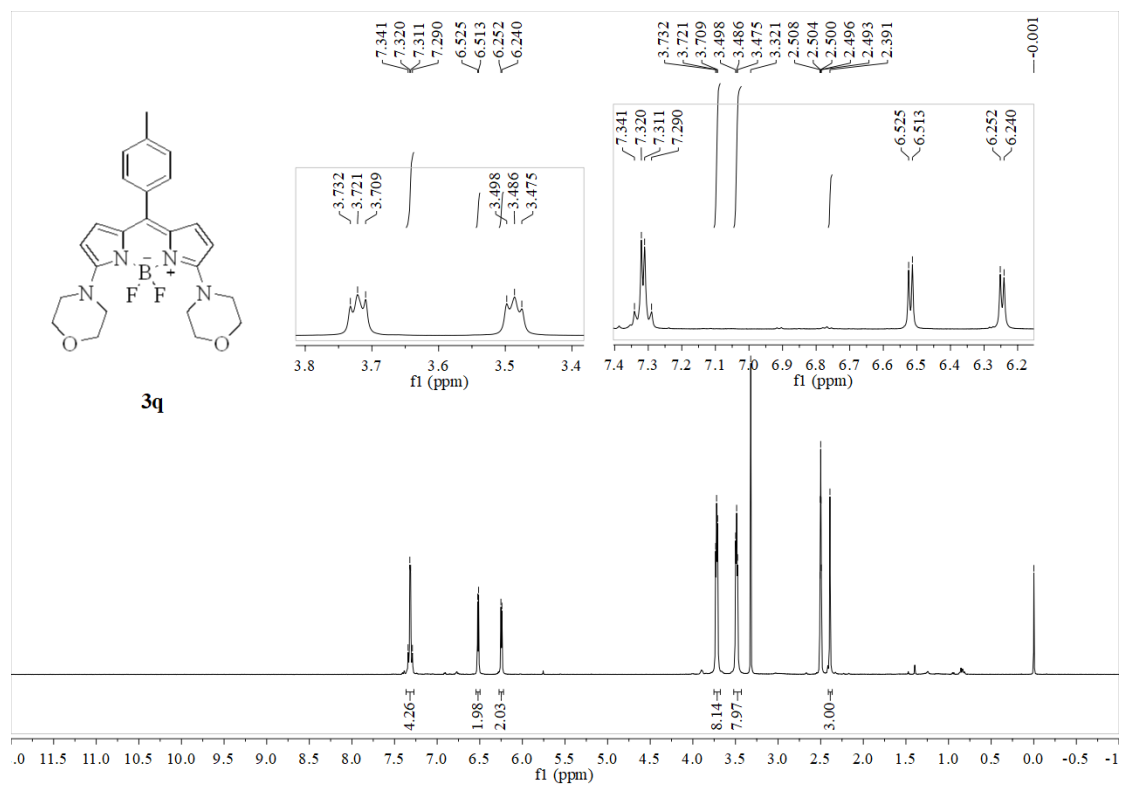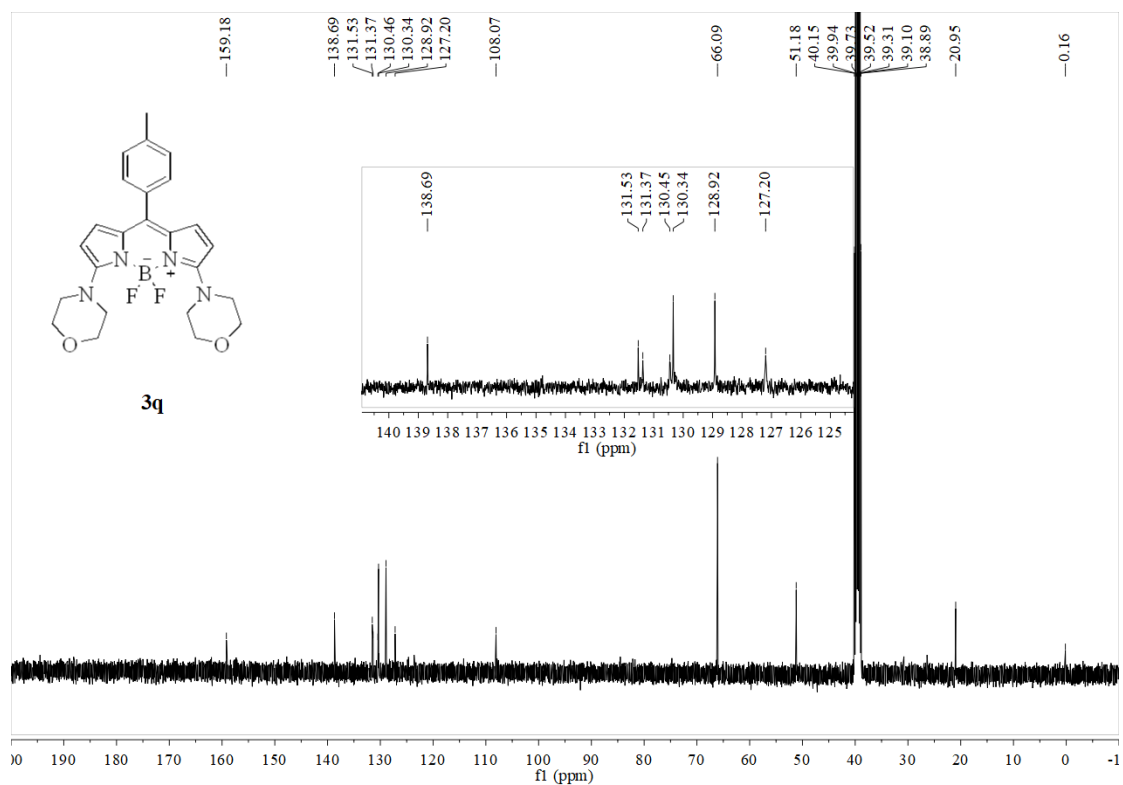

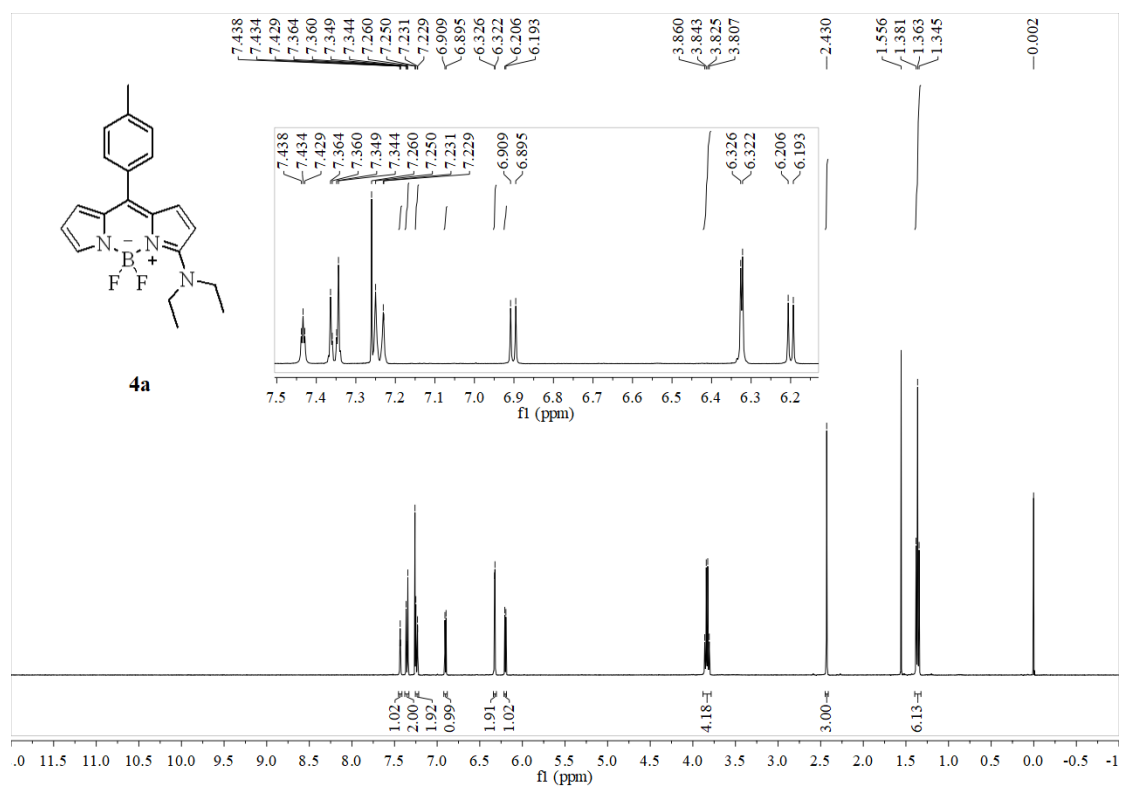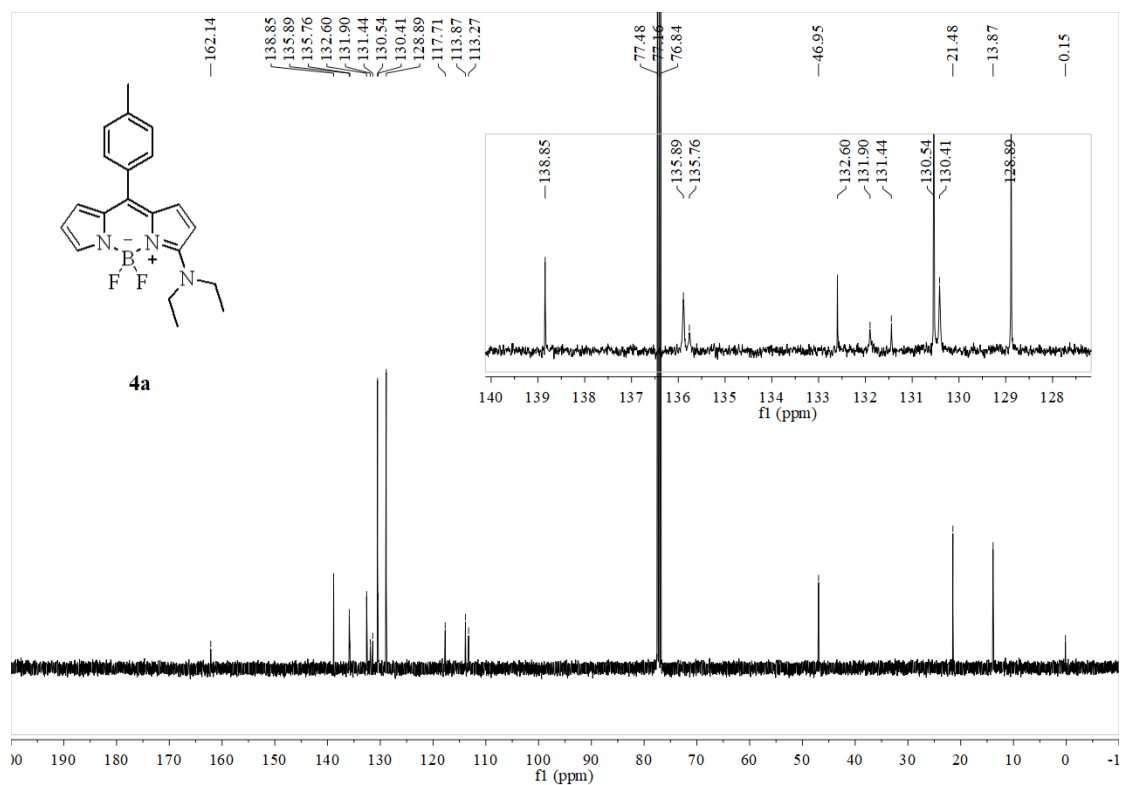

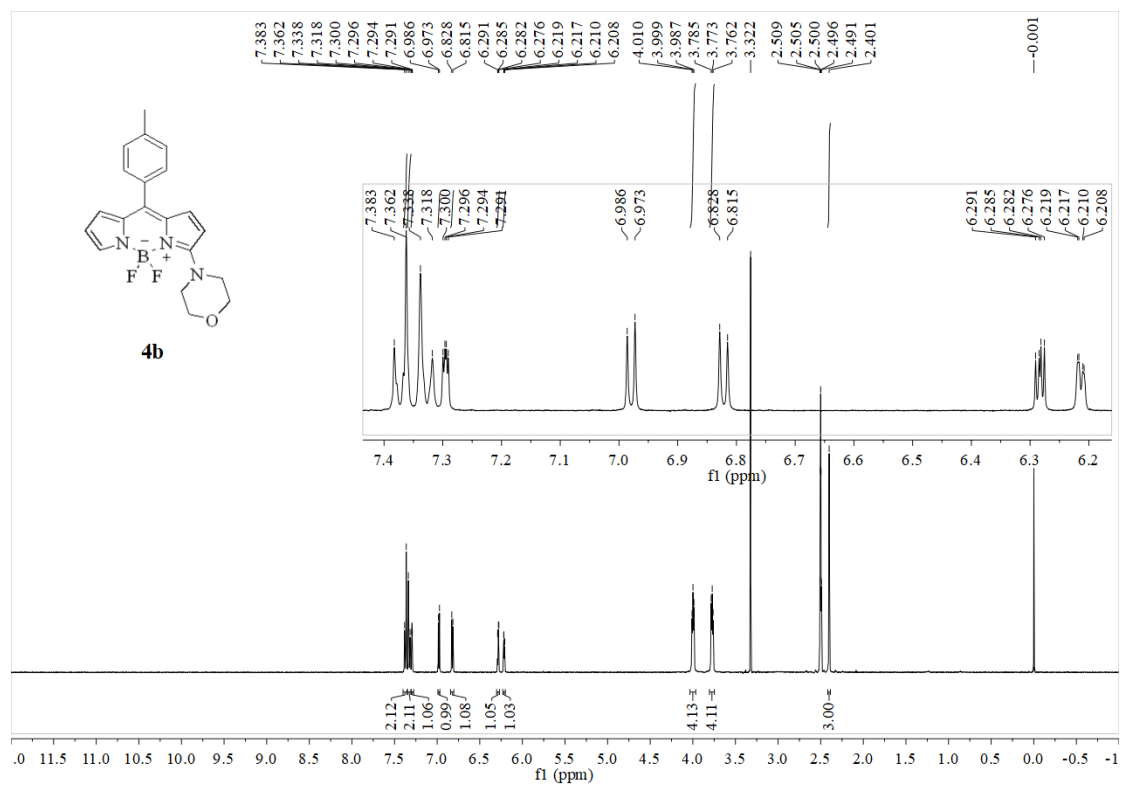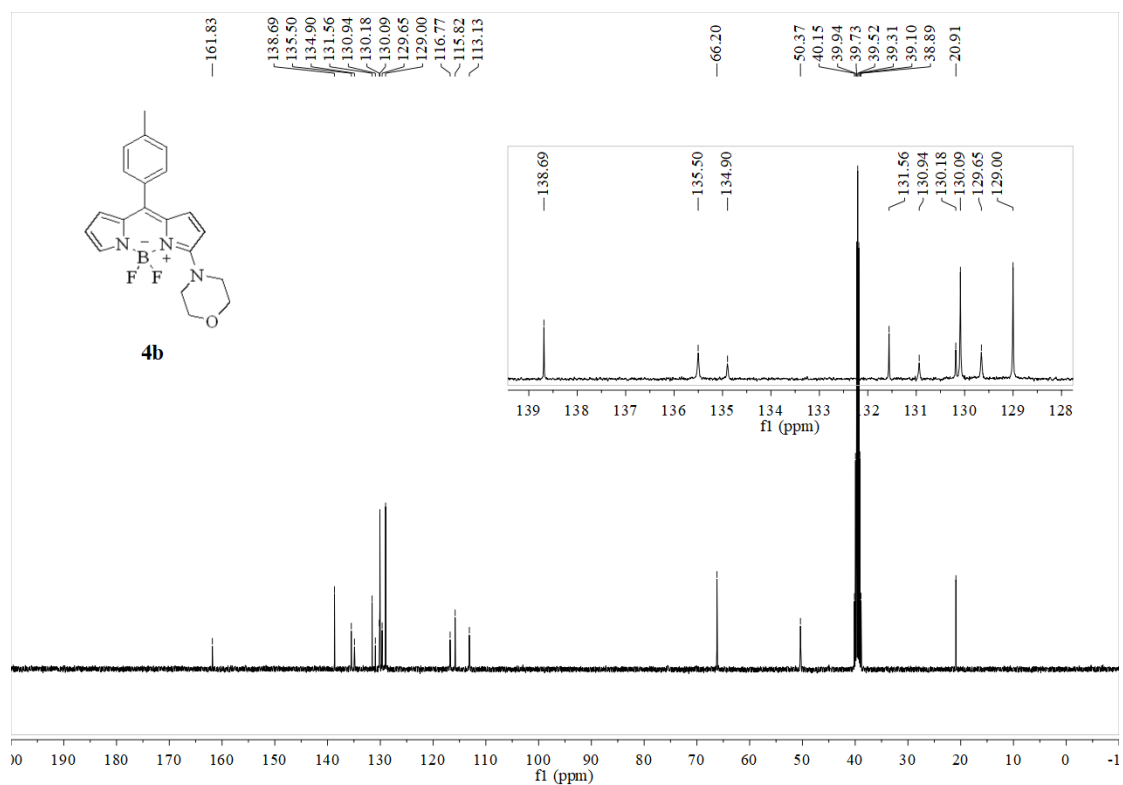

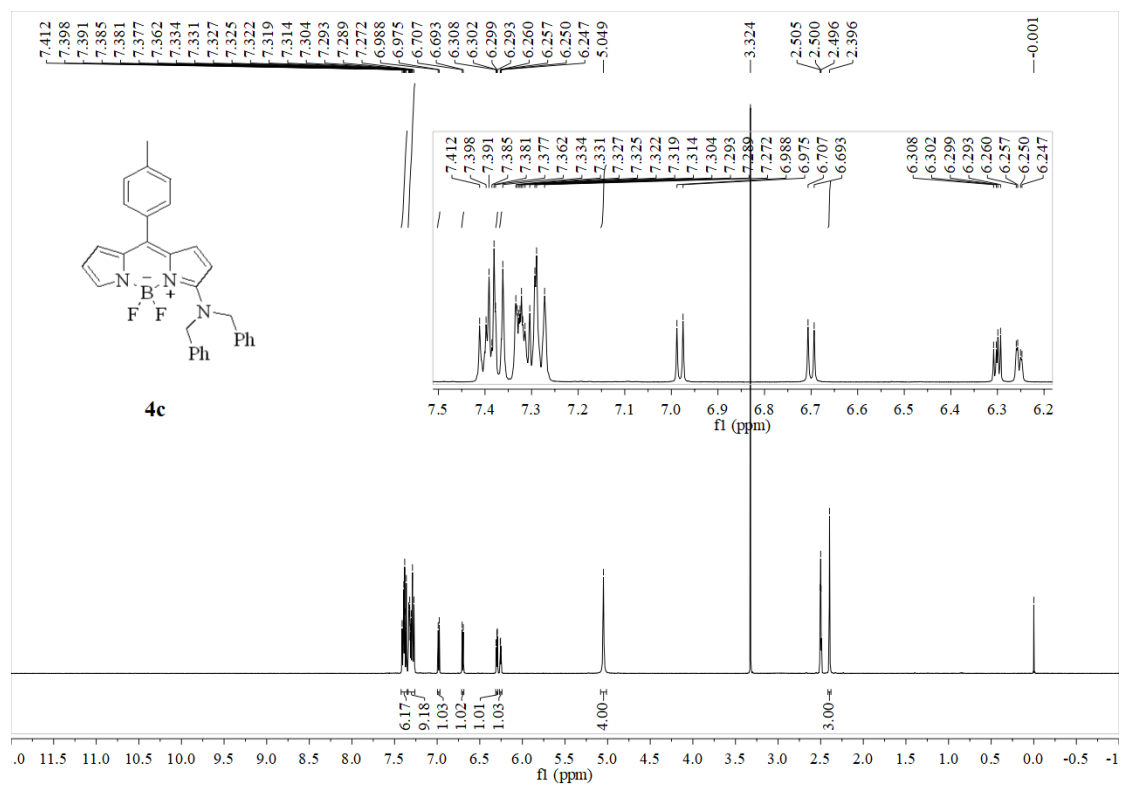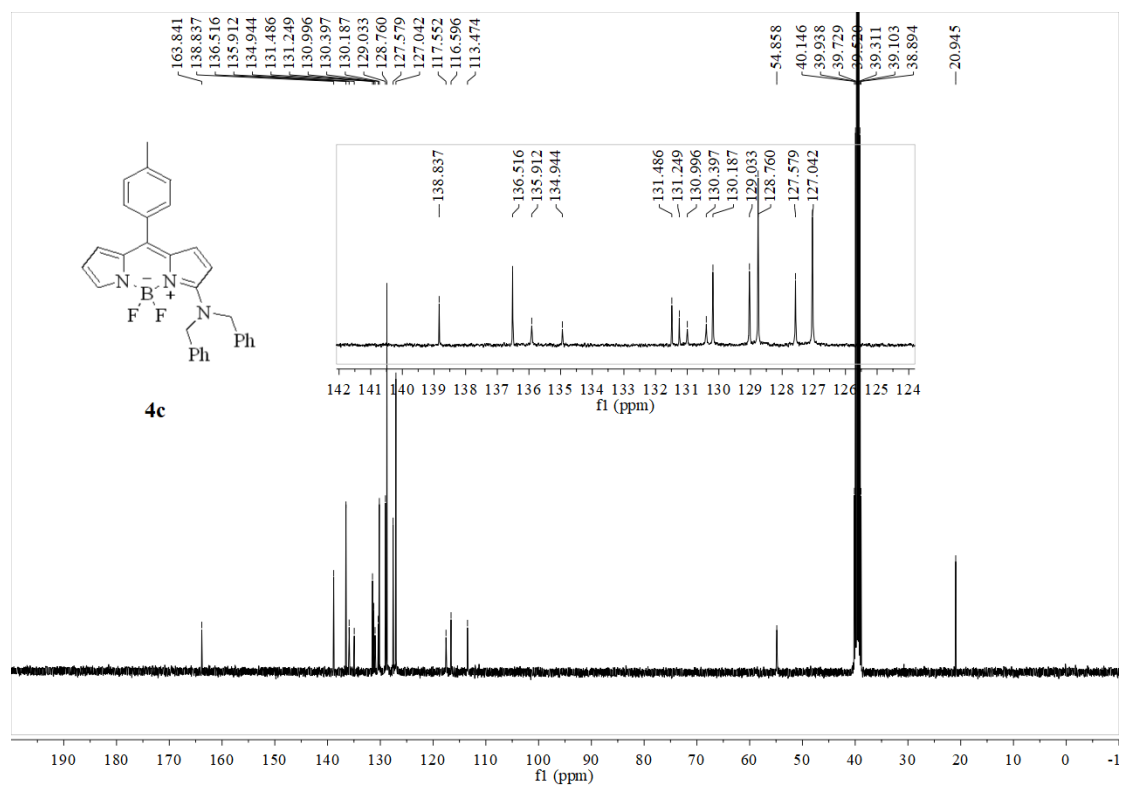

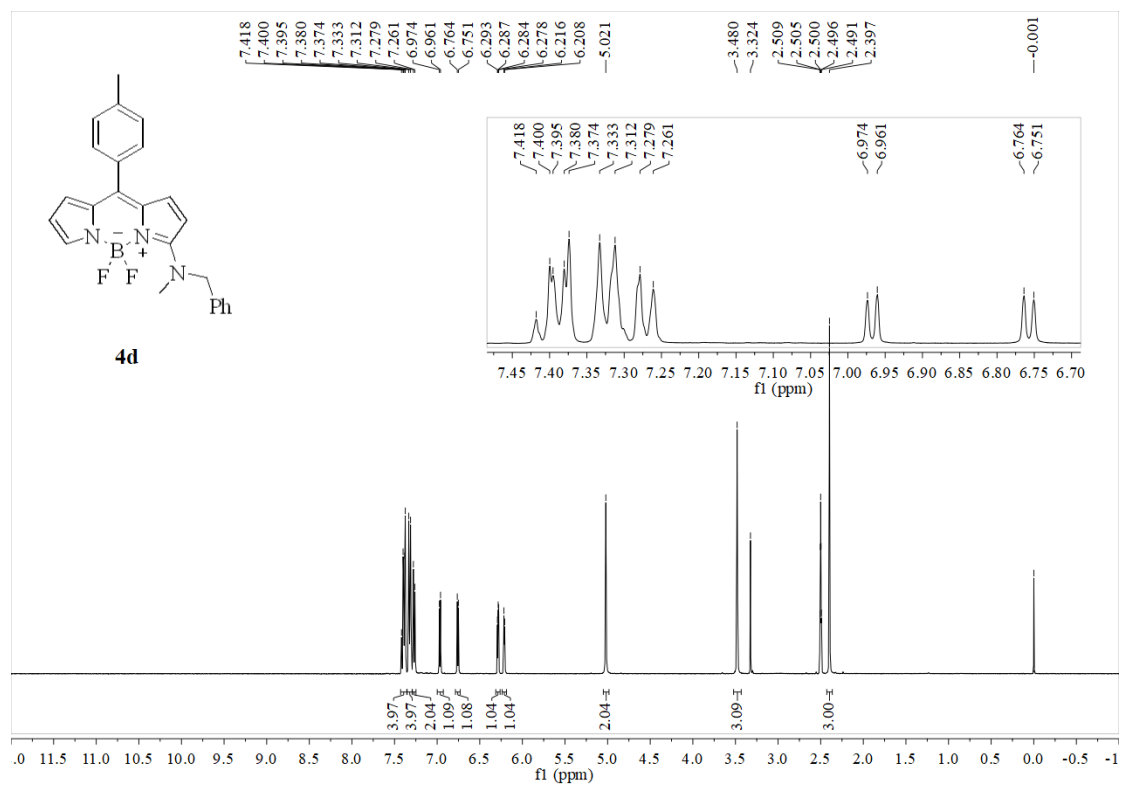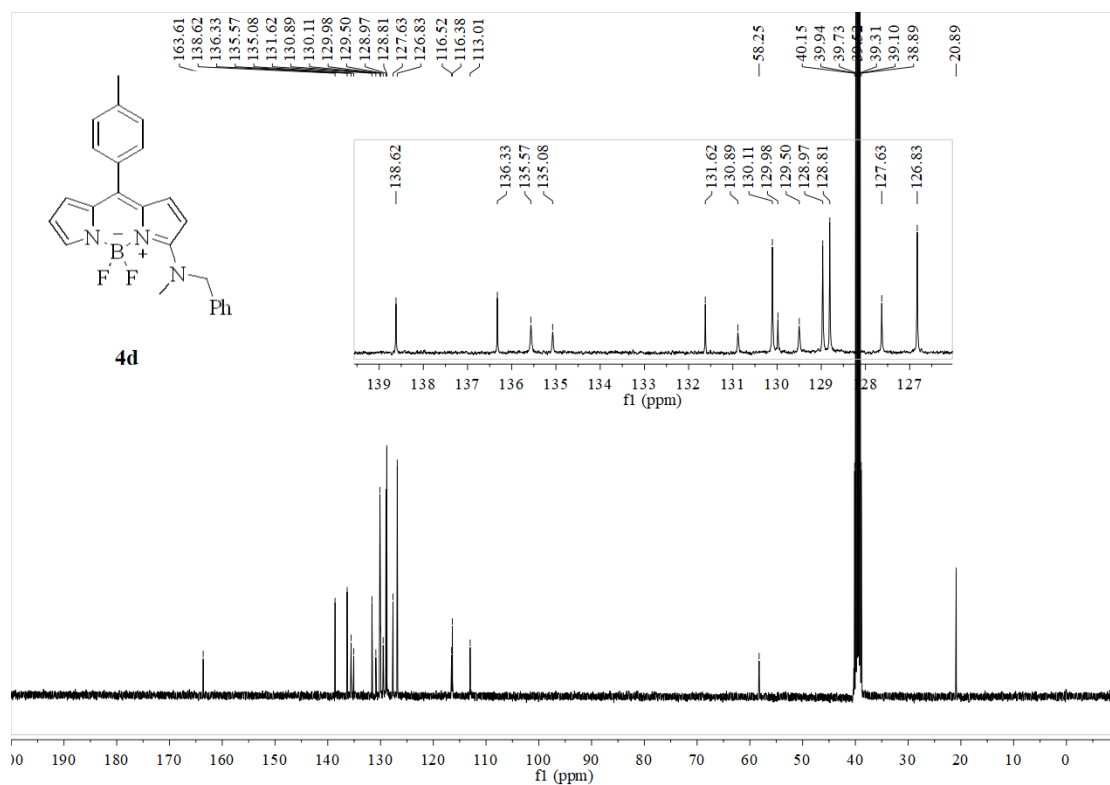

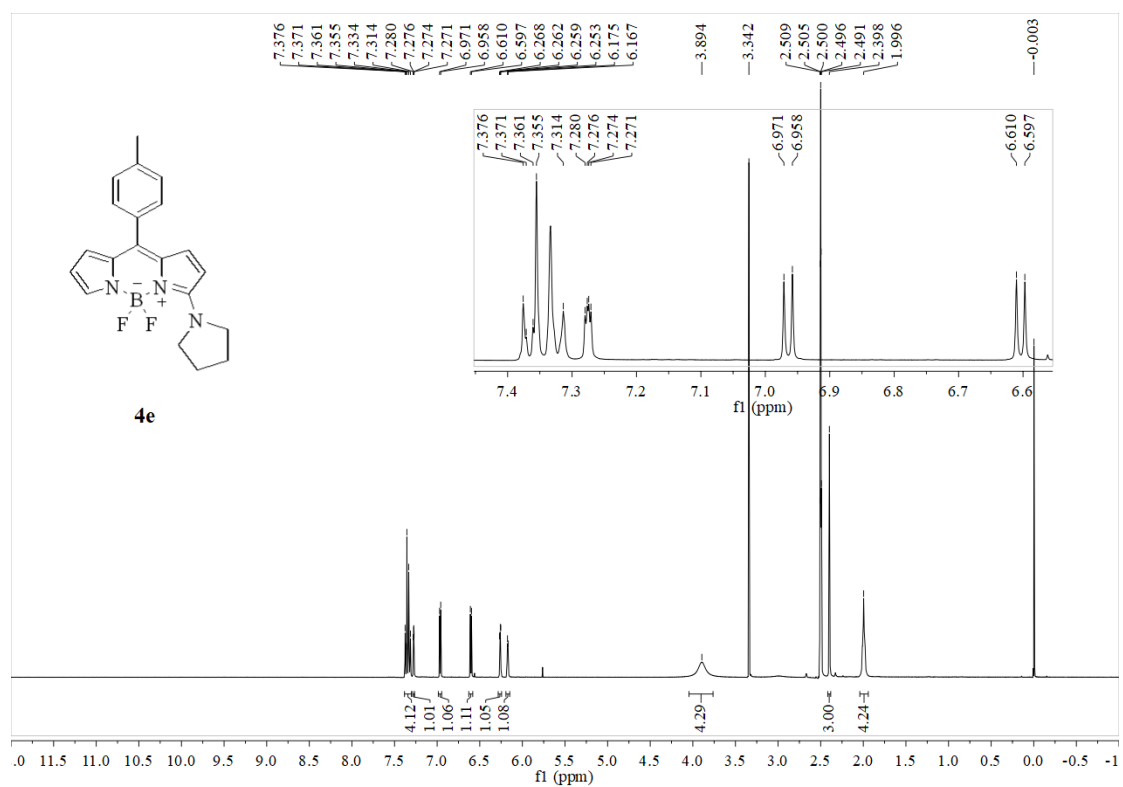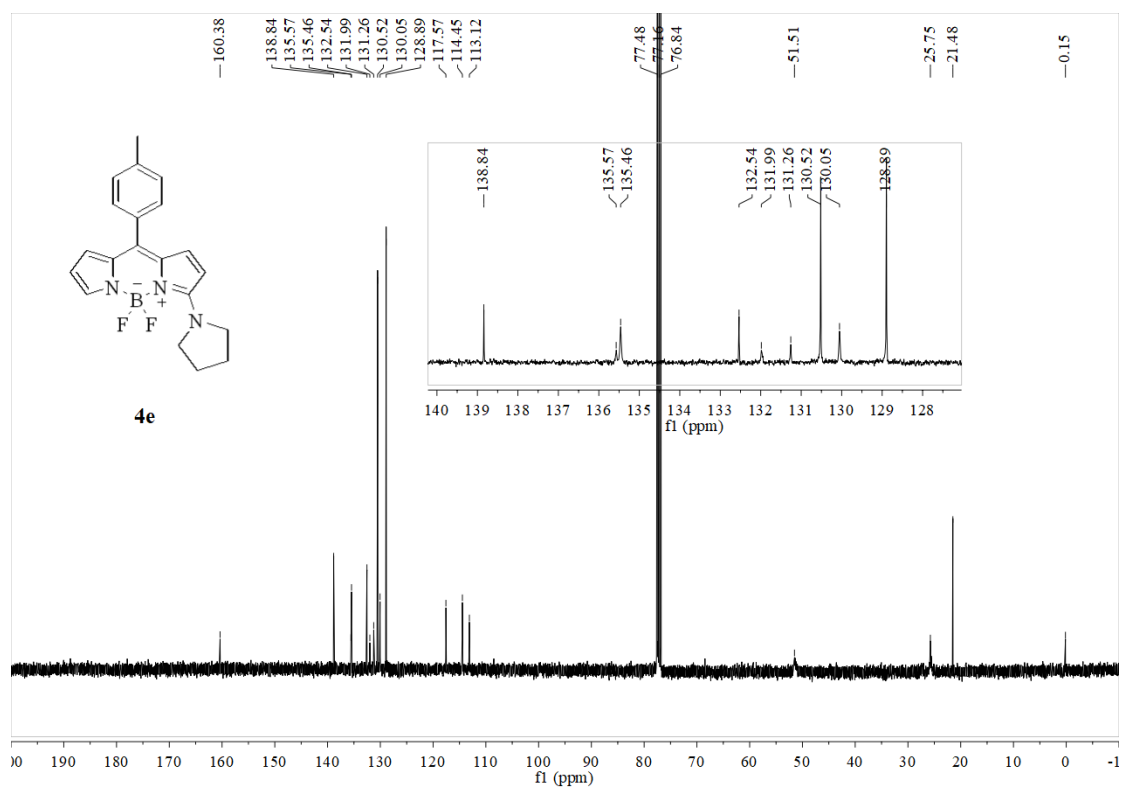

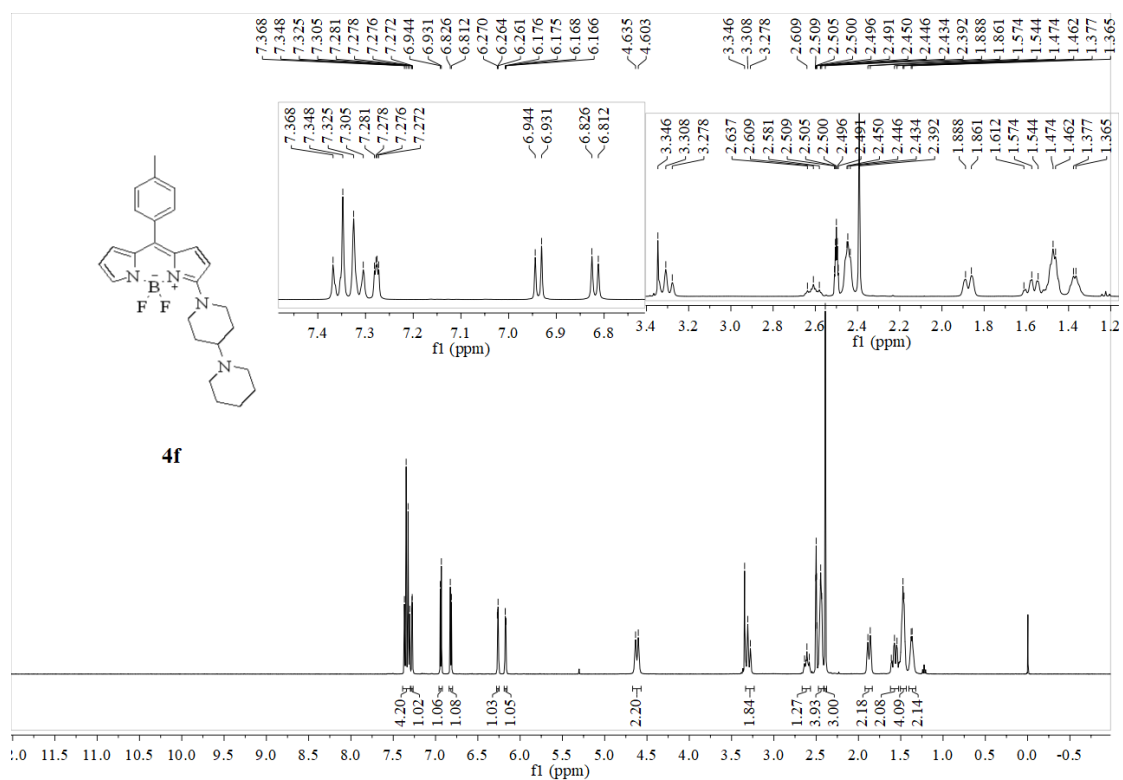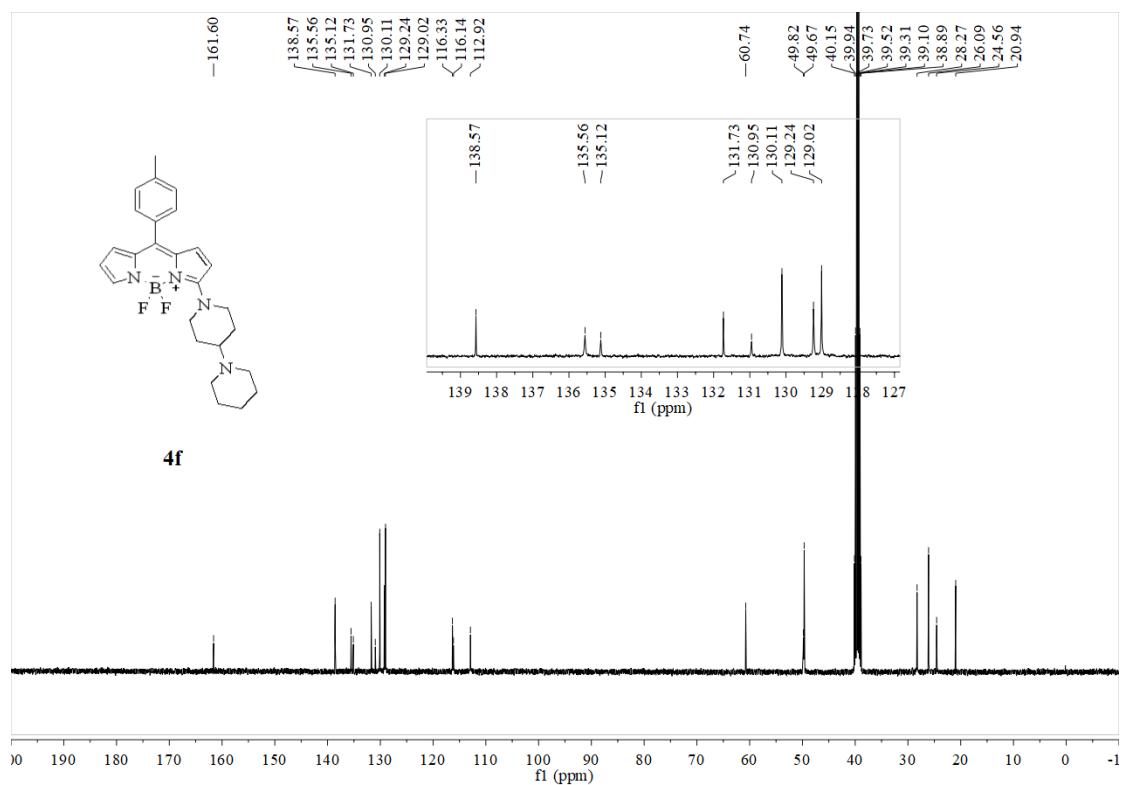

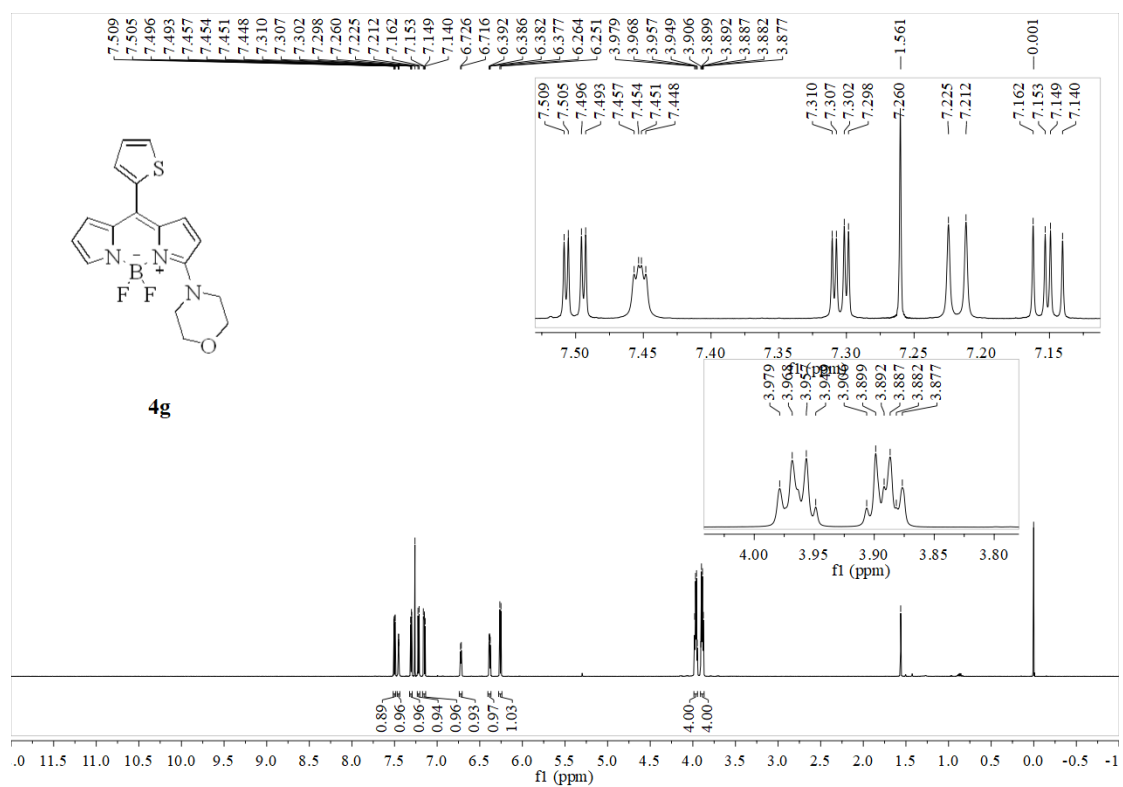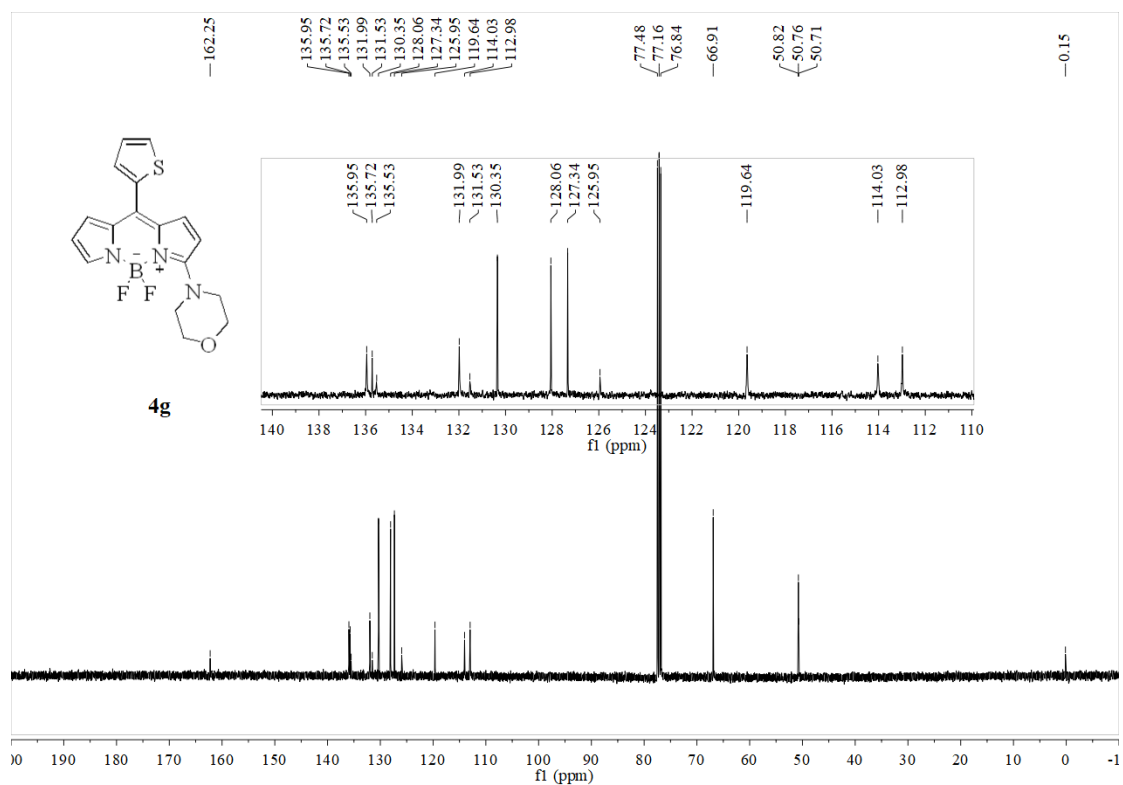

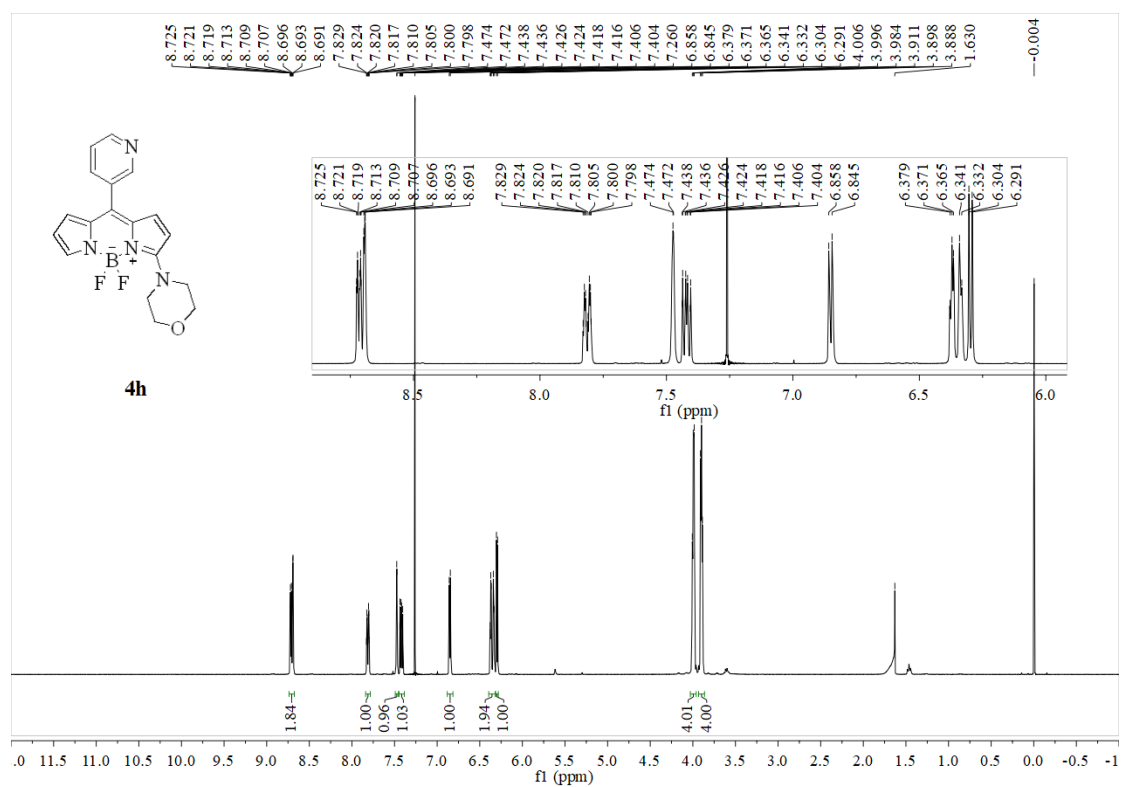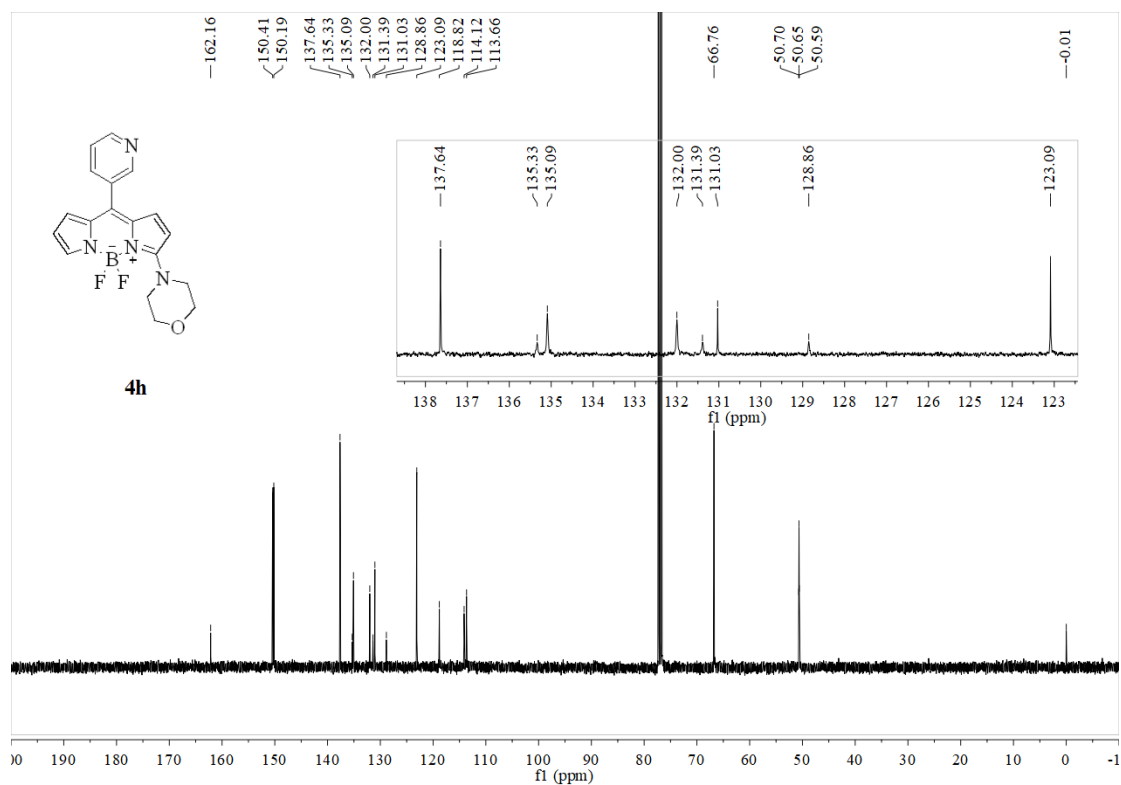

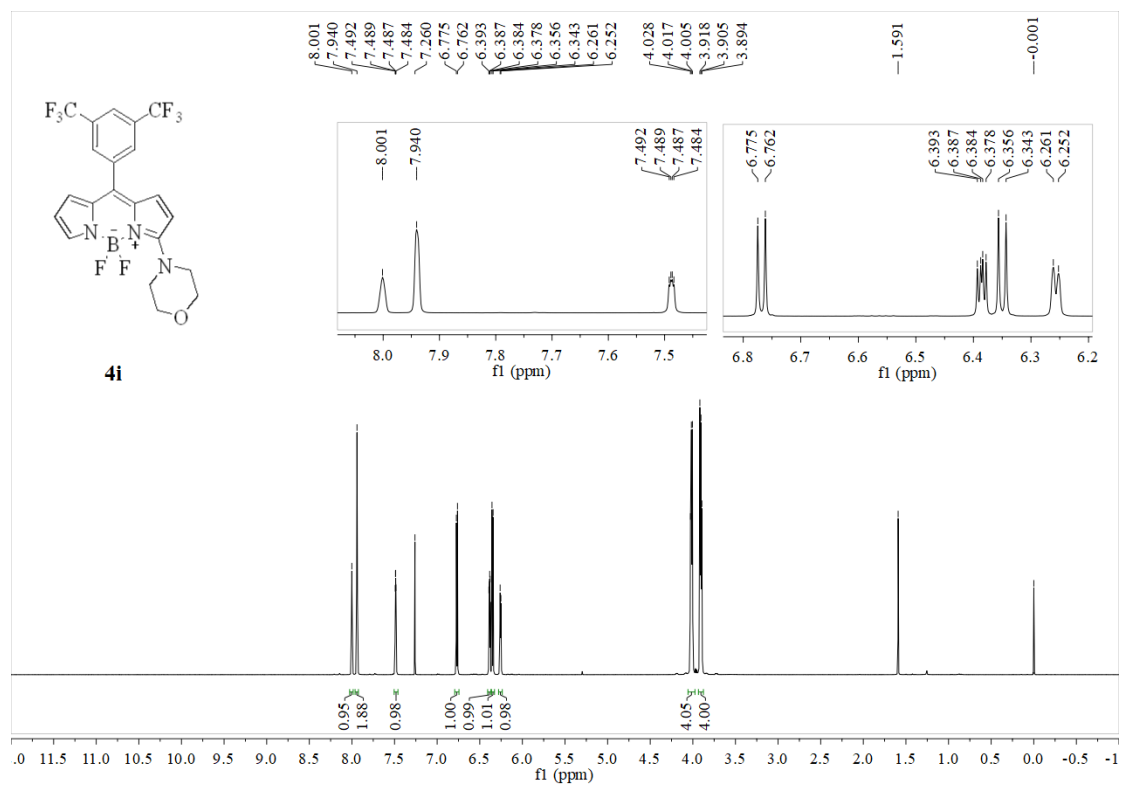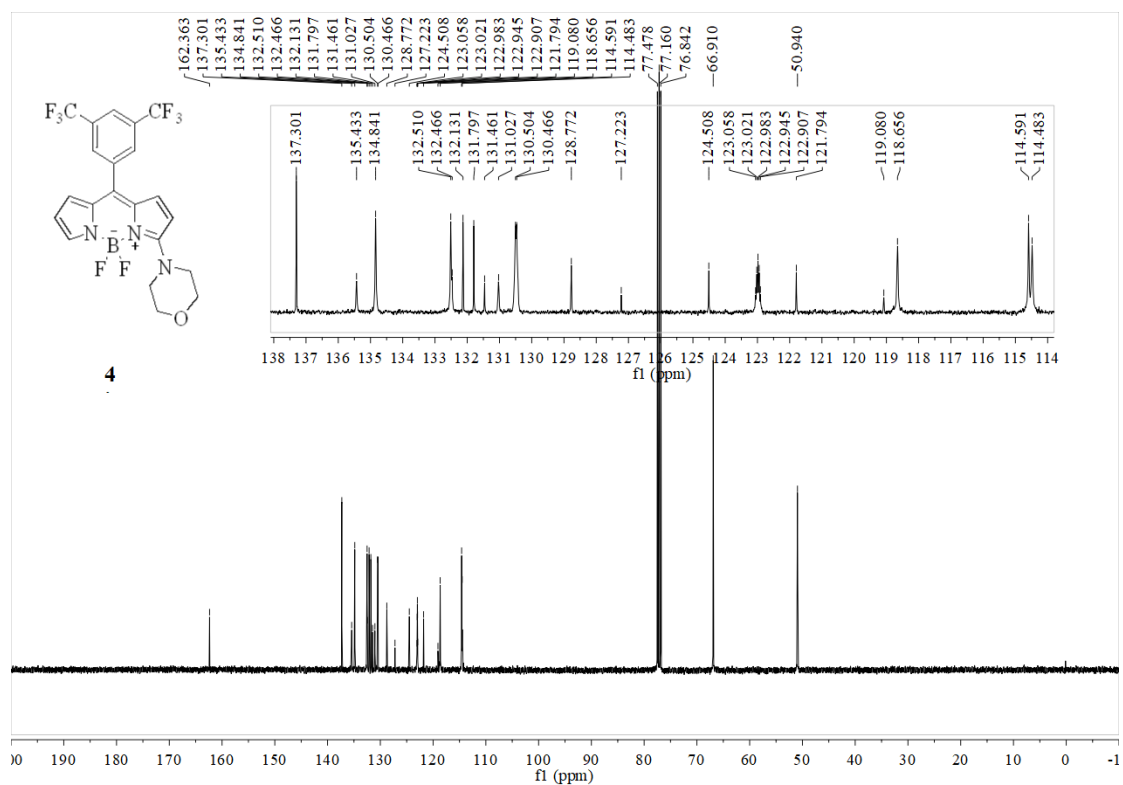

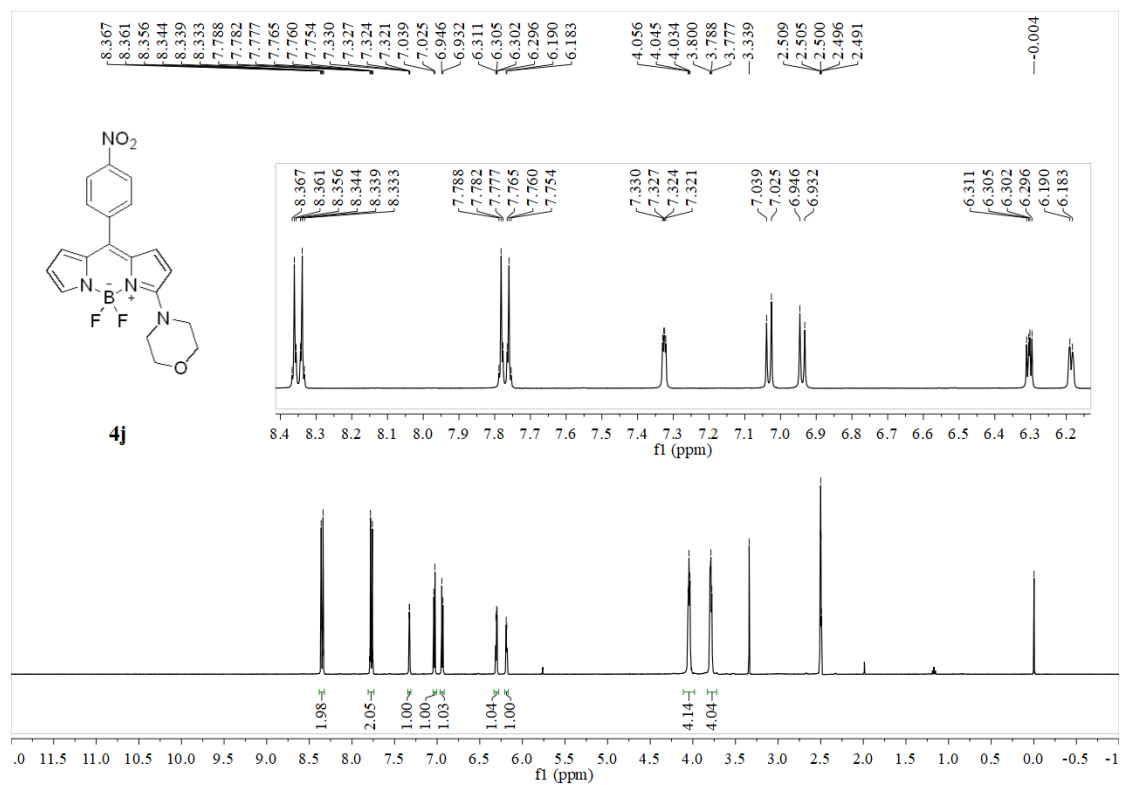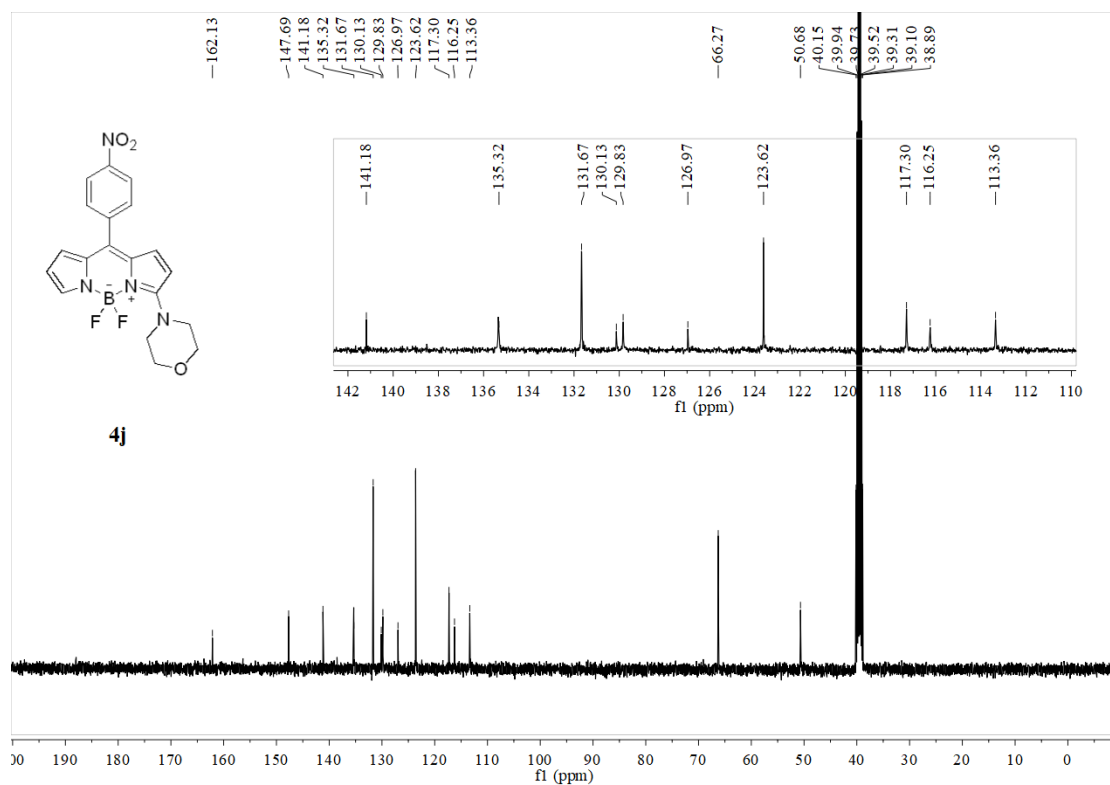

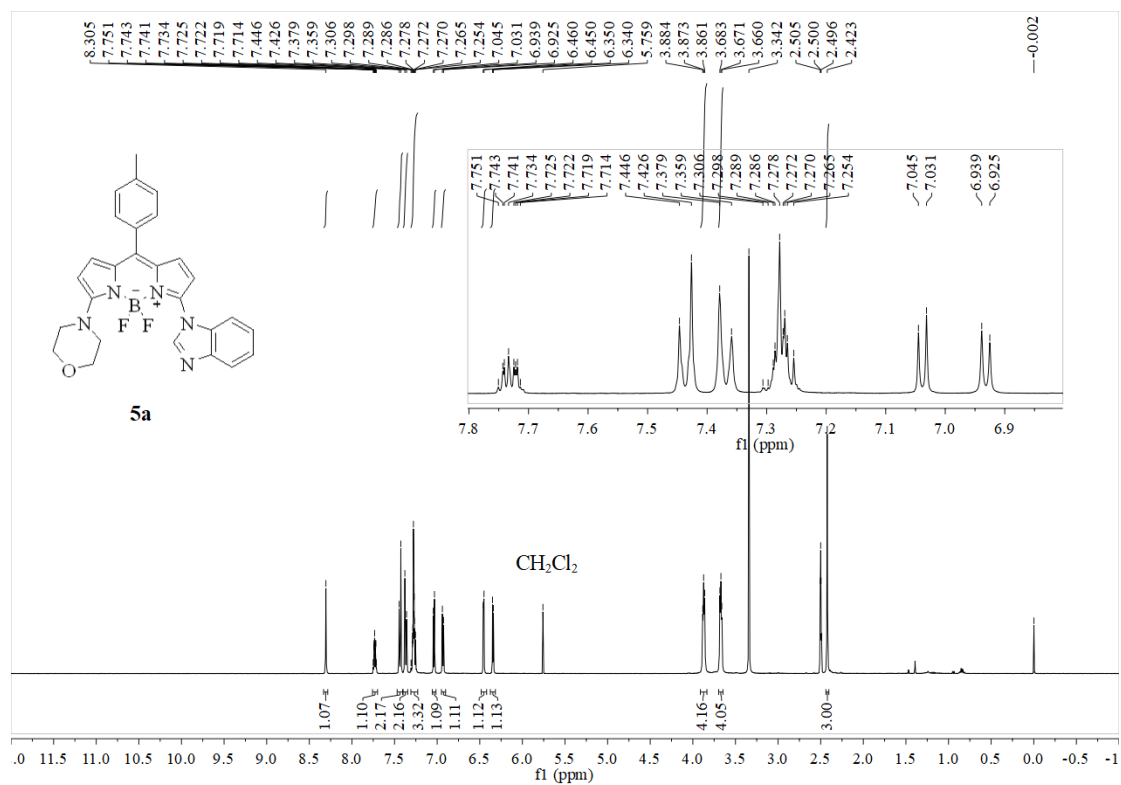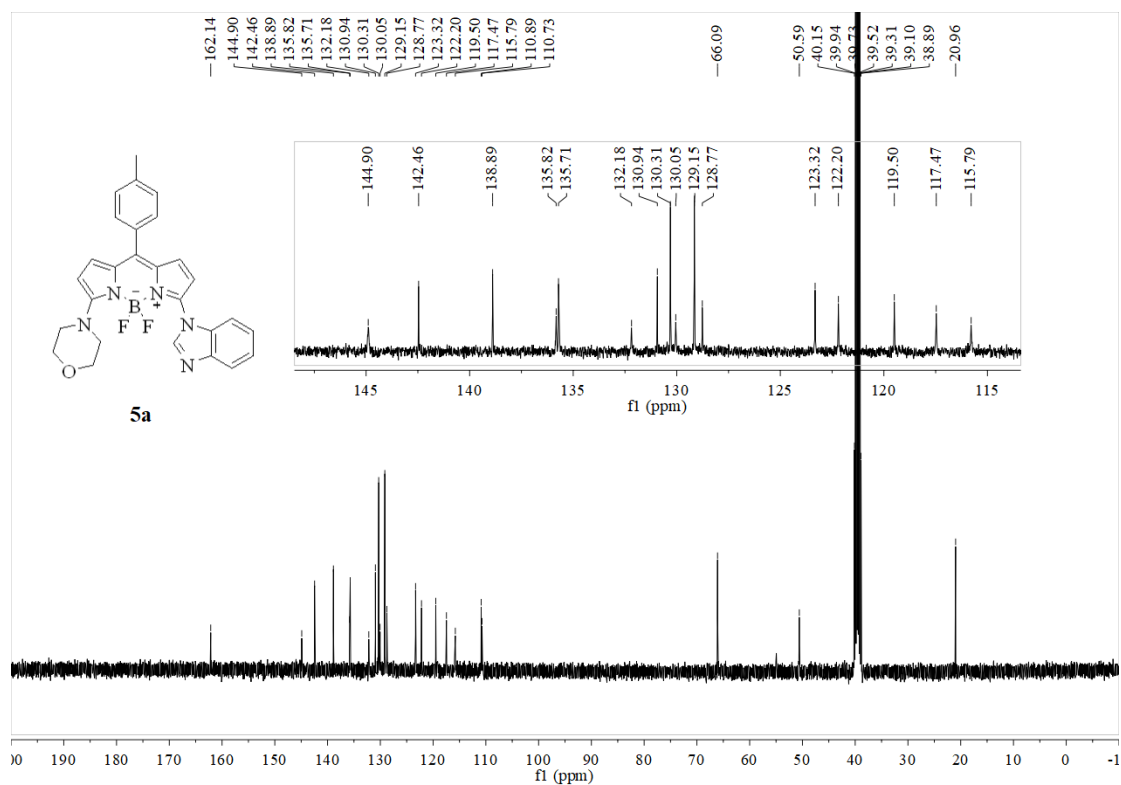

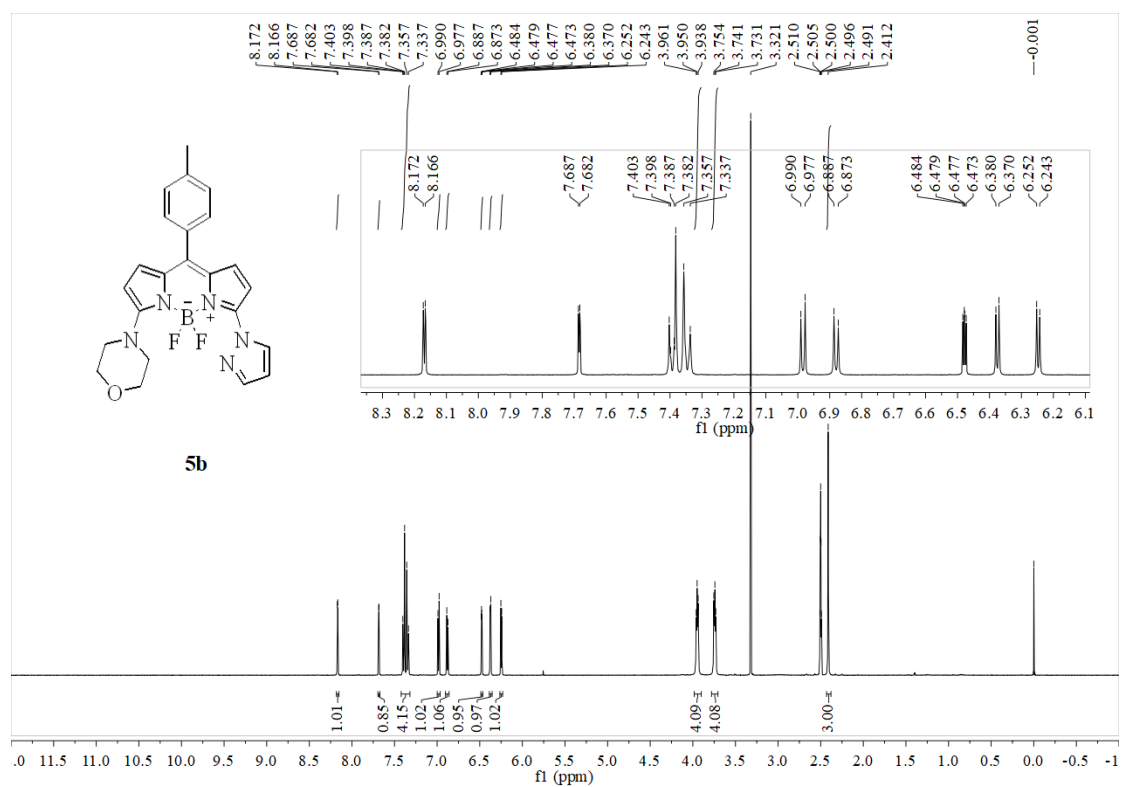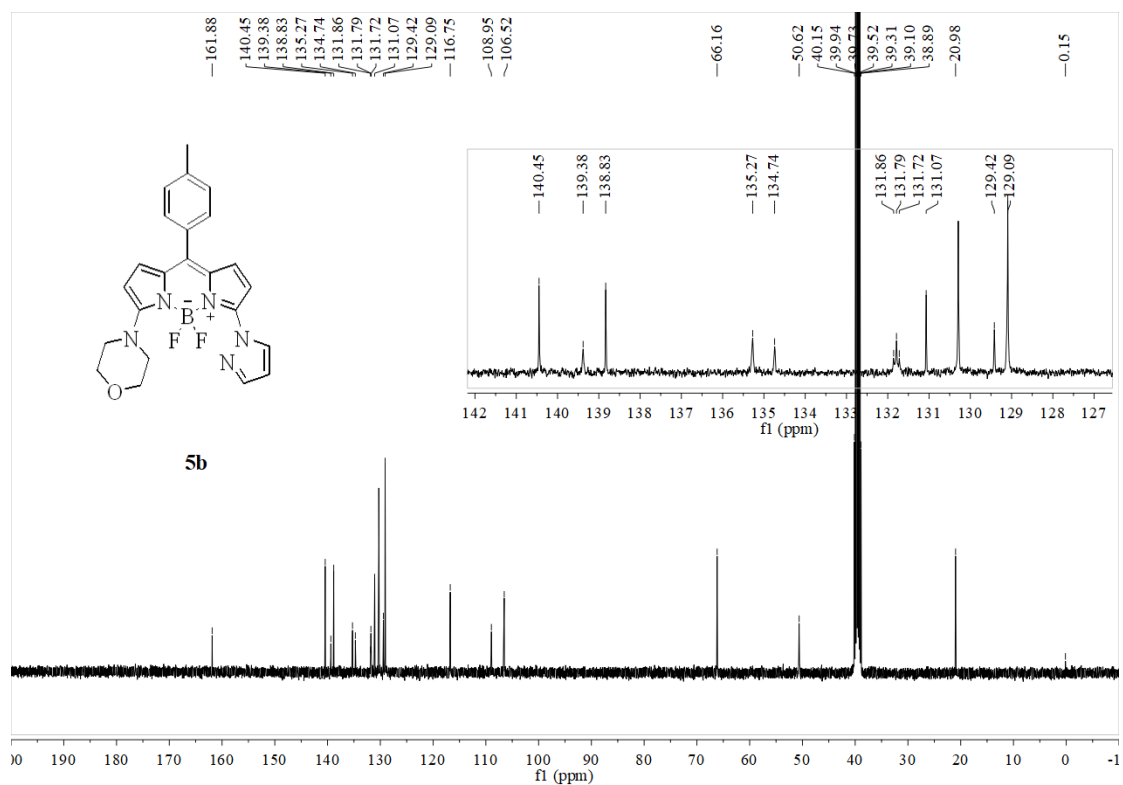

Supplement: c8cc00238j1.pdf [file c8cc00238j1.pdf]
